# Supplementary material for: Tersone A-G, New Pyridone Alkaloids from the Deep-Sea Fungus Phomopsis tersa
Source: MDPI journal article supplement (doi:10.3390/md17070394), 2019-07-03
Supplement: s1 [file s1]

## Supporting Information

### **Tersone A-G, new pyridone alkaloids from the deep-sea fungus *Phomopsis tersa***

Shan-Chong Chen<sup>1,2</sup>, Zhao-Ming Liu<sup>1</sup>, Hai-Bo Tan<sup>3</sup>, Yu-Chan Chen<sup>1</sup>, Sai-Ni Li<sup>1</sup>, Hao-Hua Li<sup>1</sup>, Heng Guo<sup>1</sup>, Shuang Zhu<sup>2</sup>, Hong-Xin Liu<sup>1,\*</sup> and Wei-Min Zhang<sup>1,\*</sup>

<sup>1</sup>State Key Laboratory of Applied Microbiology Southern China, Guangdong Provincial Key Laboratory of Microbial Culture Collection and Application, Guangdong Open Laboratory of Applied Microbiology, Guangdong Institute of Microbiology, Guangdong Academy of Sciences, Guangzhou 510070, China

<sup>2</sup>School of Biosciences and Biopharmaceutics, Guangdong Pharmaceutical University, Guangzhou 510006, China

<sup>3</sup>Program for Natural Products Chemical Biology, Key Laboratory of Plant Resources Conservation and Sustainable Utilization, Guangdong Provincial Key Laboratory of Applied Botany, South China Botanical Garden, Chinese Academy of Sciences, Guangzhou 510650, China

## Contents

### 1. Experimental Section

1.1 X-ray crystallographic analysis of compounds **1a** and **3**.

1.2 Computational details

### 2. NMR, HRESIMS, CD, UV and IR spectra of compounds 1-9

Figure S1.  $^1\text{H}$  NMR spectrum (600 MHz,  $\text{CD}_3\text{OD}$ ) of **1a**

Figure S2.  $^{13}\text{C}$  NMR spectrum (150 MHz,  $\text{CD}_3\text{OD}$ ) of **1a**

Figure S3.  $^1\text{H}$ - $^1\text{H}$  COSY spectrum of **1a** in  $\text{CD}_3\text{OD}$

Figure S4. HSQC spectrum of **1a** in  $\text{CD}_3\text{OD}$

Figure S5. HMBC spectrum of **1a** in  $\text{CD}_3\text{OD}$

Figure S6. NOESY spectrum of **1a** in  $\text{CD}_3\text{OD}$

Figure S7. HRESIMS spectrum of **1a**

Figure S8. CD spectrum of **1a**

Figure S9. UV spectrum of **1a**

Figure S10. IR spectrum of **1a**

Figure S11.  $^1\text{H}$  NMR spectrum (600 MHz,  $\text{CD}_3\text{OD}$ ) of **1b**

Figure S12.  $^{13}\text{C}$  NMR spectrum (150 MHz,  $\text{CD}_3\text{OD}$ ) of **1b**

Figure S13. HRESIMS spectrum of **1b**

Figure S14. CD spectrum of **1b**

Figure S15.  $^1\text{H}$  NMR spectrum (600 MHz,  $\text{CD}_3\text{OD}$ ) of **2a**

Figure S16.  $^{13}\text{C}$  NMR spectrum (150 MHz,  $\text{CD}_3\text{OD}$ ) of **2a**

Figure S17.  $^1\text{H}$ - $^1\text{H}$  COSY spectrum of **2a** in  $\text{CD}_3\text{OD}$

Figure S18. HSQC spectrum of **2a** in  $\text{CD}_3\text{OD}$

Figure S19. HMBC spectrum of **2a** in  $\text{CD}_3\text{OD}$

Figure S20. NOESY spectrum of **2a** in  $\text{CD}_3\text{OD}$

Figure S21. HRESIMS spectrum of **2a**

Figure S22. CD spectrum of **2a**

Figure S23. UV spectrum of **2a**

Figure S24. IR spectrum of **2a**

Figure S25.  $^1\text{H}$  NMR spectrum (600 MHz,  $\text{CD}_3\text{OD}$ ) of **2b**

Figure S26.  $^{13}\text{C}$  NMR spectrum (150 MHz,  $\text{CD}_3\text{OD}$ ) of **2b**

Figure S27. HRESIMS spectrum of **2b**

Figure S28. CD spectrum of **2b**

Figure S29.  $^1\text{H}$  NMR spectrum (600 MHz,  $\text{CD}_3\text{OD}$ ) of **3a**

Figure S30.  $^{13}\text{C}$  NMR spectrum (150 MHz,  $\text{CD}_3\text{OD}$ ) of **3a**

Figure S31.  $^1\text{H}$ - $^1\text{H}$  COSY spectrum of **3a** in  $\text{CD}_3\text{OD}$

Figure S32. HSQC spectrum of **3a** in  $\text{CD}_3\text{OD}$

Figure S33. HMBC spectrum of **3a** in  $\text{CD}_3\text{OD}$

Figure S34. NOESY spectrum of **3a** in  $\text{CD}_3\text{OD}$

Figure S35. HRESIMS spectrum of **3a**

Figure S36. CD spectrum of **3a**

Figure S37. UV spectrum of **3a**

Figure S38. IR spectrum of **3a**

Figure S39.  $^1\text{H}$  NMR spectrum (600 MHz,  $\text{CD}_3\text{OD}$ ) of **3b**

Figure S40.  $^{13}\text{C}$  NMR spectrum (150 MHz,  $\text{CD}_3\text{OD}$ ) of **3b**

Figure S41. HRESIMS spectrum of **3b**

Figure S42. CD spectrum of **3b**

Figure S43.  $^1\text{H}$  NMR spectrum (600 MHz,  $\text{CD}_3\text{OD}$ ) of **4a**

Figure S44.  $^{13}\text{C}$  NMR spectrum (150 MHz,  $\text{CD}_3\text{OD}$ ) of **4a**

Figure S45.  $^1\text{H}$ - $^1\text{H}$  COSY spectrum of **4a** in  $\text{CD}_3\text{OD}$

Figure S46. HSQC spectrum of **4a** in  $\text{CD}_3\text{OD}$

Figure S47. HMBC spectrum of **4a** in  $\text{CD}_3\text{OD}$

Figure S48. NOESY spectrum of **4a** in  $\text{CD}_3\text{OD}$

Figure S49. HRESIMS spectrum of **4a**

Figure S50. CD spectrum of **4a**

Figure S51. UV spectrum of **4a**

Figure S52. IR spectrum of **4a**

Figure S53.  $^1\text{H}$  NMR spectrum (600 MHz,  $\text{CD}_3\text{OD}$ ) of **4b**

Figure S54.  $^{13}\text{C}$  NMR spectrum (150 MHz,  $\text{CD}_3\text{OD}$ ) of **4b**

Figure S55. HRESIMS spectrum of **4b**

Figure S56. CD spectrum of **4b**

Figure S57.  $^1\text{H}$  NMR spectrum (600 MHz,  $\text{CD}_3\text{OD}$ ) of **5a**

Figure S58.  $^{13}\text{C}$  NMR spectrum (150 MHz,  $\text{CD}_3\text{OD}$ ) of **5a**

Figure S59.  $^1\text{H}$ - $^1\text{H}$  COSY spectrum of **5a** in  $\text{CD}_3\text{OD}$

Figure S60. HSQC spectrum of **5a** in  $\text{CD}_3\text{OD}$

Figure S61. HMBC spectrum of **5a** in  $\text{CD}_3\text{OD}$

Figure S62. NOESY spectrum of **5a** in  $\text{CD}_3\text{OD}$

Figure S63. HRESIMS spectrum of **5a**

Figure S64. CD spectrum of **5a**

Figure S65. UV spectrum of **5a**

Figure S66. IR spectrum of **5a**

Figure S67.  $^1\text{H}$  NMR spectrum (600 MHz,  $\text{CD}_3\text{OD}$ ) of **5b**

Figure S68.  $^{13}\text{C}$  NMR spectrum (150 MHz,  $\text{CD}_3\text{OD}$ ) of **5b**

Figure S69. HRESIMS spectrum of **5b**

Figure S70. CD spectrum of **5b**

Figure S71.  $^1\text{H}$  NMR spectrum (600 MHz,  $\text{CD}_3\text{OD}$ ) of **6**

Figure S72.  $^{13}\text{C}$  NMR spectrum (150 MHz,  $\text{CD}_3\text{OD}$ ) of **6**

Figure S73.  $^1\text{H}$ - $^1\text{H}$  COSY spectrum of **6** in  $\text{CD}_3\text{OD}$

Figure S74. HSQC spectrum of **6** in  $\text{CD}_3\text{OD}$

Figure S75. HMBC spectrum of **6** in  $\text{CD}_3\text{OD}$

Figure S76. NOESY spectrum of **6** in  $\text{CD}_3\text{OD}$

Figure S77. HRESIMS spectrum of **6**

Figure S78. CD spectrum of **6**

Figure S79. UV spectrum of **6**

Figure S80. IR spectrum of **6**

Figure S81.  $^1\text{H}$  NMR spectrum (600 MHz,  $\text{CD}_3\text{OD}$ ) of **7**

Figure S82.  $^{13}\text{C}$  NMR spectrum (150 MHz,  $\text{CD}_3\text{OD}$ ) of **7**

Figure S83.  $^1\text{H}$ - $^1\text{H}$  COSY spectrum of **7** in  $\text{CD}_3\text{OD}$

Figure S84. HSQC spectrum of **7** in CD<sub>3</sub>OD

Figure S85. HMBC spectrum of **7** in CD<sub>3</sub>OD

Figure S86. HRESIMS spectrum of **7**

Figure S87. UV spectrum of **7**

Figure S88. IR spectrum of **7**

Figure S89. <sup>1</sup>H NMR spectrum (600 MHz, CD<sub>3</sub>OD) of **8a**

Figure S90. <sup>13</sup>C NMR spectrum (150 MHz, CD<sub>3</sub>OD) of **8a**

Figure S91. <sup>1</sup>H NMR spectrum (600 MHz, CD<sub>3</sub>OD) of **8b**

Figure S92. <sup>13</sup>C NMR spectrum (150 MHz, CD<sub>3</sub>OD) of **8b**

Figure S93. <sup>1</sup>H NMR spectrum (600 MHz, CD<sub>3</sub>OD) of **9**

Figure S94. <sup>13</sup>C NMR spectrum (150 MHz, CD<sub>3</sub>OD) of **9**

## 1. Experimental Section

### 1.1 X-ray crystallographic analysis of compounds **1a** and **3**.

**Table S1.** X-ray crystallographic data for (–)-tersone A (**1a**).

|                                   |                                                                                                                                 |
|-----------------------------------|---------------------------------------------------------------------------------------------------------------------------------|
| Empirical formula                 | C <sub>19</sub> H <sub>19</sub> NO <sub>3</sub>                                                                                 |
| Formula weight                    | 309.34                                                                                                                          |
| Temperature                       | 99.9(8) K                                                                                                                       |
| Wavelength                        | 1.54184 Å                                                                                                                       |
| Crystal system                    | monoclinic                                                                                                                      |
| Space group                       | 12                                                                                                                              |
| Unit cell dimensions              | a = 15.4694(2) Å $\alpha = 90^\circ$<br>b = 11.28363(15) Å $\beta = 101.9564(15)^\circ$<br>c = 21.3051(3) Å $\gamma = 90^\circ$ |
| Volume                            | 3638.15(9) Å <sup>3</sup>                                                                                                       |
| Z                                 | 8                                                                                                                               |
| Density (calculated)              | 1.126 Mg/m <sup>3</sup>                                                                                                         |
| Absorption coefficient            | 0.617 mm <sup>-1</sup>                                                                                                          |
| F(000)                            | 1304.0                                                                                                                          |
| Crystal size                      | 0.08 x 0.06 x 0.05 mm <sup>3</sup>                                                                                              |
| Theta range for data collection   | 8.484 to 148.346 °                                                                                                              |
| Index ranges                      | -18 ≤ h ≤ 19, -13 ≤ k ≤ 13, -26 ≤ l ≤ 26                                                                                        |
| Reflections collected             | 18985                                                                                                                           |
| Independent reflections           | 7142 [R(int) = 0.0489]                                                                                                          |
| Completeness to theta = 66.97 °   | 99.94 %                                                                                                                         |
| Absorption correction             | multi-scan                                                                                                                      |
| Refinement method                 | Full-matrix least-squares on F <sup>2</sup>                                                                                     |
| Data / restraints / parameters    | 7142 / 1 / 423                                                                                                                  |
| Goodness-of-fit on F <sup>2</sup> | 1.062                                                                                                                           |
| Final R indices [I > 2σ(I)]       | R1 = 0.0404, wR2 = 0.1055                                                                                                       |
| R indices (all data)              | R1 = 0.0483, wR2 = 0.1101                                                                                                       |
| Absolute structure parameter      | 0.09(10)                                                                                                                        |
| Largest diff. peak and hole       | 0.23 and -0.19 e.Å <sup>-3</sup>                                                                                                |

**Table S2.** X-ray crystallographic data for ( $\pm$ )-tersone C (**3**).

|                                   |                                                                                                                     |
|-----------------------------------|---------------------------------------------------------------------------------------------------------------------|
| Empirical formula                 | C <sub>19</sub> H <sub>19</sub> NO <sub>3</sub>                                                                     |
| Formula weight                    | 309.35                                                                                                              |
| Temperature                       | 103(6) K                                                                                                            |
| Wavelength                        | 1.54184 Å                                                                                                           |
| Crystal system                    | monoclinic                                                                                                          |
| Space group                       | P2 <sub>1</sub> /n                                                                                                  |
| Unit cell dimensions              | a = 8.94020(10) Å $\alpha$ = 90 °<br>b = 17.2446(2) Å $\beta$ = 98.8880(10) °<br>c = 10.33770(10) Å $\gamma$ = 90 ° |
| Volume                            | 1574.63(3) Å <sup>3</sup>                                                                                           |
| Z                                 | 4                                                                                                                   |
| Density (calculated)              | 1.305 Mg/m <sup>3</sup>                                                                                             |
| Absorption coefficient            | 0.713 mm <sup>-1</sup>                                                                                              |
| F(000)                            | 656.0                                                                                                               |
| Crystal size                      | 0.08 x 0.07 x 0.05 mm <sup>3</sup>                                                                                  |
| Theta range for data collection   | 10.066 to 148.01 °                                                                                                  |
| Index ranges                      | -10 ≤ h ≤ 10, -15 ≤ k ≤ 21, -12 ≤ l ≤ 11                                                                            |
| Reflections collected             | 8528                                                                                                                |
| Independent reflections           | 3083 [R(int) = 0.0280]                                                                                              |
| Completeness to theta = 67.97 °   | 99.76 %                                                                                                             |
| Absorption correction             | multi-scan                                                                                                          |
| Refinement method                 | Full-matrix least-squares on F <sup>2</sup>                                                                         |
| Data / restraints / parameters    | 3083 / 0 / 211                                                                                                      |
| Goodness-of-fit on F <sup>2</sup> | 1.044                                                                                                               |
| Final R indices [I > 2σ(I)]       | R1 = 0.0368, wR2 = 0.0964                                                                                           |
| R indices (all data)              | R1 = 0.0429, wR2 = 0.1002                                                                                           |
| Largest diff. peak and hole       | 0.20 and -0.23 e.Å <sup>-3</sup>                                                                                    |

## 1.2 Computational details

**Methods.** Merck molecular force field (MMFF) and DFT/TD-DFT calculations were carried out with the Spartan'14 software (Wavefunction Inc., Irvine, CA, USA) and the Gaussian 09 program, respectively [1]. Conformers within the 10 kcal mol<sup>-1</sup> energy window were generated and optimized using DFT calculations at the b3lyp/6-31+g(d,p) level. Frequency calculations were performed at the same level to confirm that each optimized conformer was true minimum and to estimate their relative thermal free energy ( $\Delta G$ ) at 298.15 K. Conformers with the Boltzmann distribution over 5% were chosen for ECD calculations in methanol at the b3lyp/6-311+g(d,p) level. Solvent effects were taken into consideration using the self-consistent reaction field (SCRF) method with the polarizable continuum model (PCM) [2]. The ECD spectrum was generated by the

SpecDis program [3] using a Gaussian band shape with 0.26 eV exponential half-width from dipole-length dipolar and rotational strengths.

## Results.

**Table S3.** Energy analysis for the conformers of **4**.

| compounds | conformation | G (Hartree)   | G (Kcal/mol) | $\Delta G$<br>(Kcal/mol) | Boltzma<br>nn Dist<br>(%) |
|-----------|--------------|---------------|--------------|--------------------------|---------------------------|
| <b>4</b>  | a            | -940.73426083 | -590313.4768 | 0                        | 74.82%                    |
|           | b            | -940.73323300 | -590312.8319 | 0.644901673              | 25.18%                    |

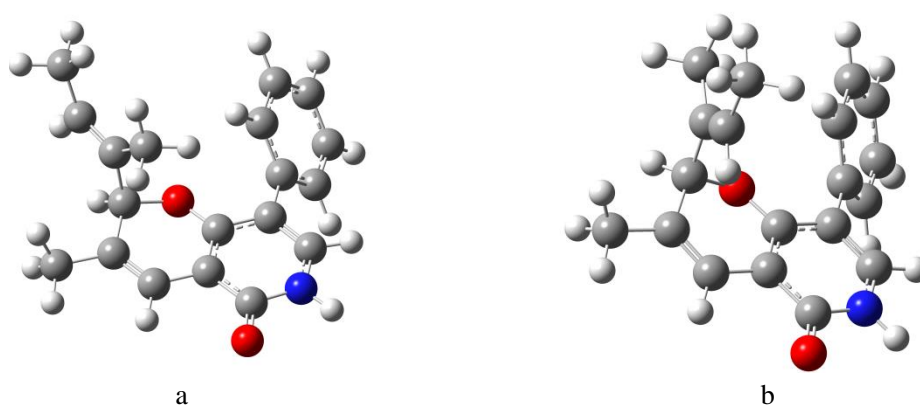

**Figure S1.** B3LYP/6-31G(d) optimized low-energy conformers of **4**

## References

1. Frisch, M.J.; Trucks, G.W.; Schlegel, H.B.; Scuseria, G.E.; Robb, M.A.; Cheeseman, J.R.; Scalmani, G.; Barone, V.; Mennucci, B.; Petersson, G.A.; Nakatsuji, H.; Caricato, M.; Li, X.; Hratchian, H.P.; Izmaylov, A.F.; Bloino, J.; Zheng, G.; Sonnenberg, J.L.; Hada, M.; Ehara, M.; Toyota, K.; Fukuda, R.; Hasegawa, J.; Ishida, M.; Nakajima, T.; Honda, Y.; Kitao, O.; Nakai, H.; Vreven, T.; Montgomery Jr., J.A.; Peralta, J.E.; Ogliaro, F.; Bearpark, M.; Heyd, J.J.; Brothers, E.; Kudin, K.N.; Staroverov, V.N.; Kobayashi, R.; Normand, J.; Raghavachari, K.; Rendell, A.; Burant, J.C.; Iyengar, S.S.; Tomasi, J.; Cossi, M.; Rega, N.; Millam, J.M.; Klene, M.; Knox, J.E.; Cross, J.B.; Bakken, V.; Adamo, C.; Jaramillo, J.; Gomperts, R.; Stratmann, R.E.; Yazyev, O.; Austin, A.J.; Cammi, R.; Pomelli, C.; Ochterski, J.W.; Martin, R.L.; Morokuma, K.; Zakrzewski, V.G.; Voth, G. A.; Salvador, P.; Dannenberg, J.J.; Dapprich, S.; Daniels, A.D.; Farkas, Ö.; Foresman, J.B.; Ortiz, J.V.; Cioslowski, J.; Fox, D.J. Gaussian 09, revision D.01, Gaussian, Inc., Wallingford, CT, **2013**.
2. Wu, P.; Xue, J.; Yao, L.; Xu, L.; Li, H.; Wei, X. Bisacremine E-G, three polycyclic dimeric acemine produced by *Acremonium persicinum* SC0105. *Org. Lett.*, **2015**, *17*, 4922.
3. Bruhn, T.; Schaumlöffel, A.; Hemberger, Y.; Bringmann, G. SpecDis: Quantifying the comparison of calculated and experimental electronic circular dichroism spectra. *Chirality*, **2013**, *25*, 243.



## 2. NMR, HRESIMS, CD, UV and IR spectrum of compounds 1-9

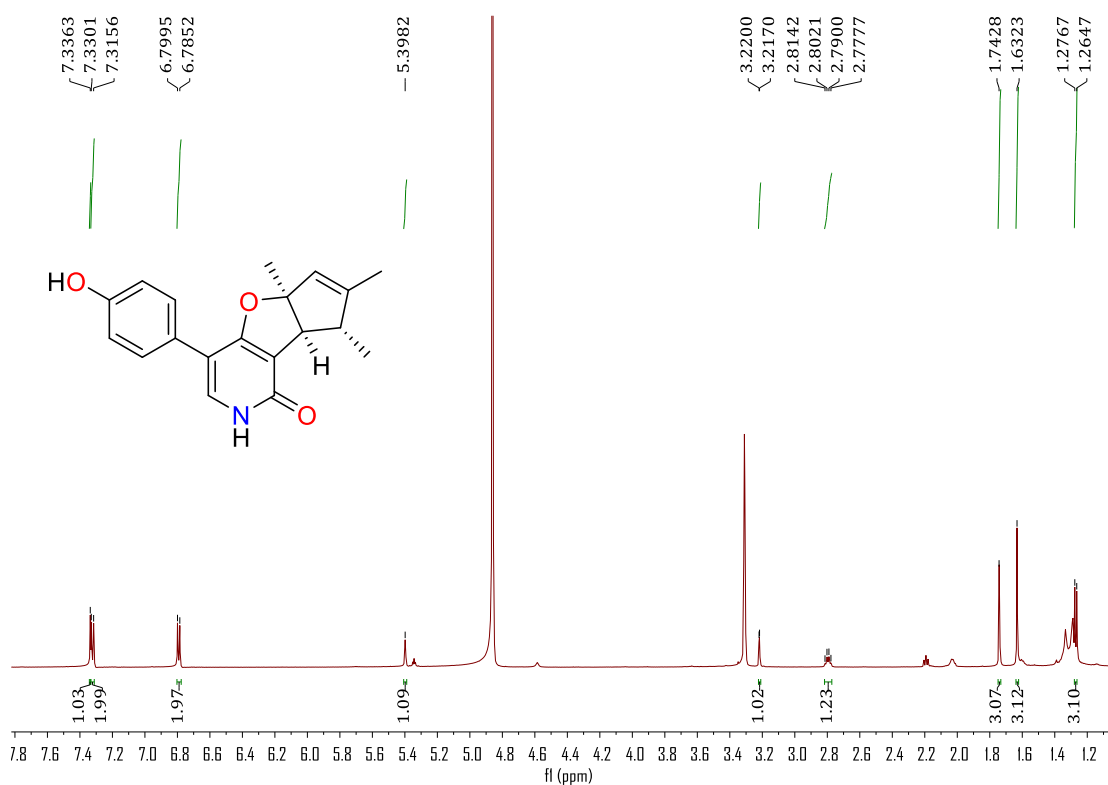

Figure S1.  $^1\text{H}$  NMR spectrum (600 MHz,  $\text{CD}_3\text{OD}$ ) of **1a**

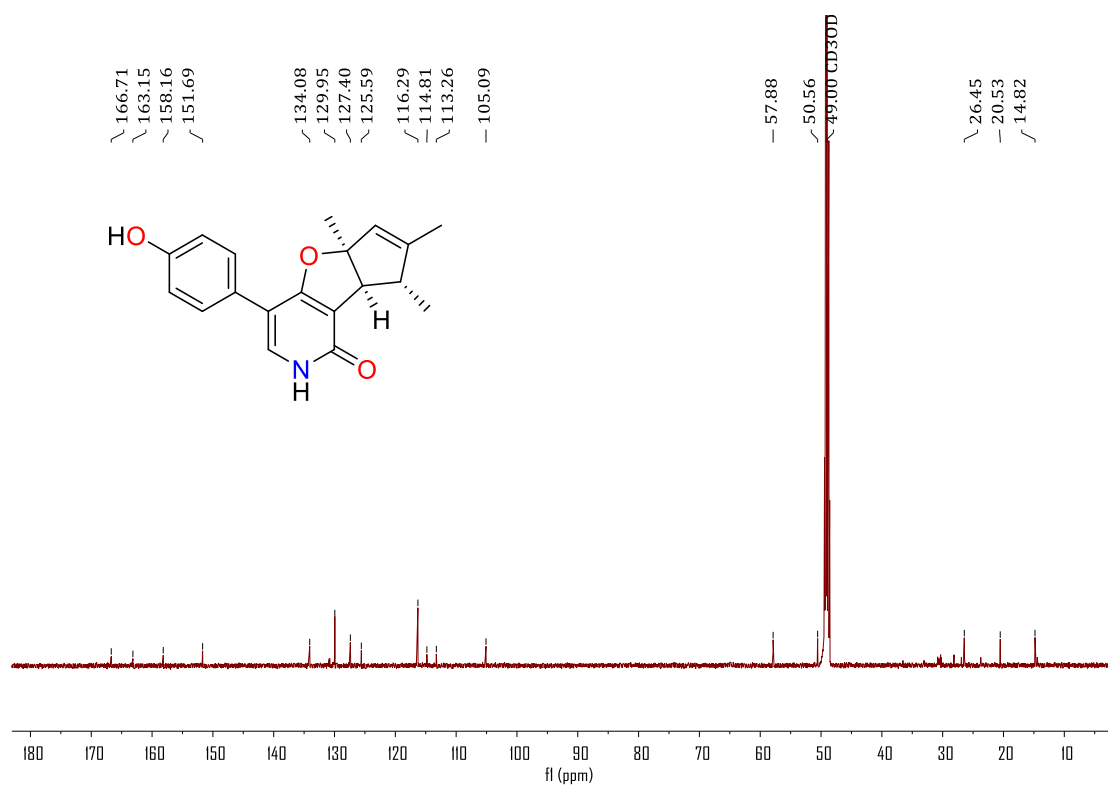

Figure S2.  $^{13}\text{C}$  NMR spectrum (150 MHz,  $\text{CD}_3\text{OD}$ ) of **1a**

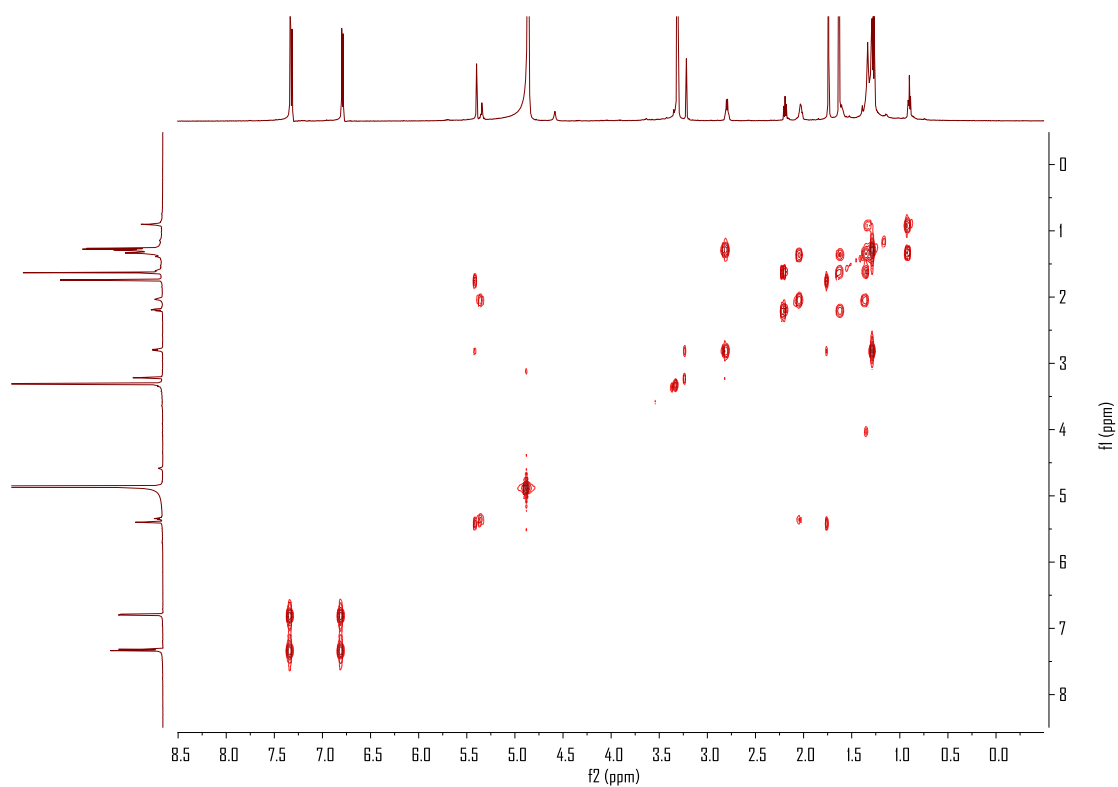

Figure S3.  $^1\text{H}$ - $^1\text{H}$  COSY spectrum of **1a** in  $\text{CD}_3\text{OD}$

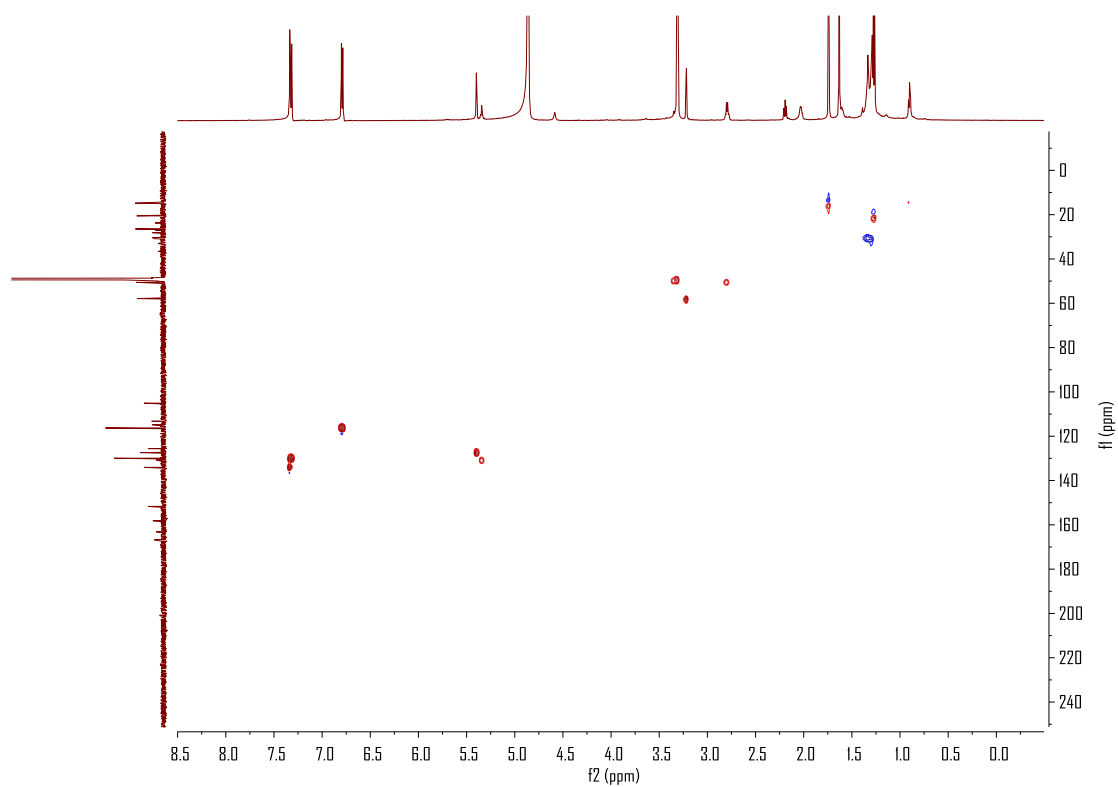

Figure S4. HSQC spectrum of **1a** in  $\text{CD}_3\text{OD}$

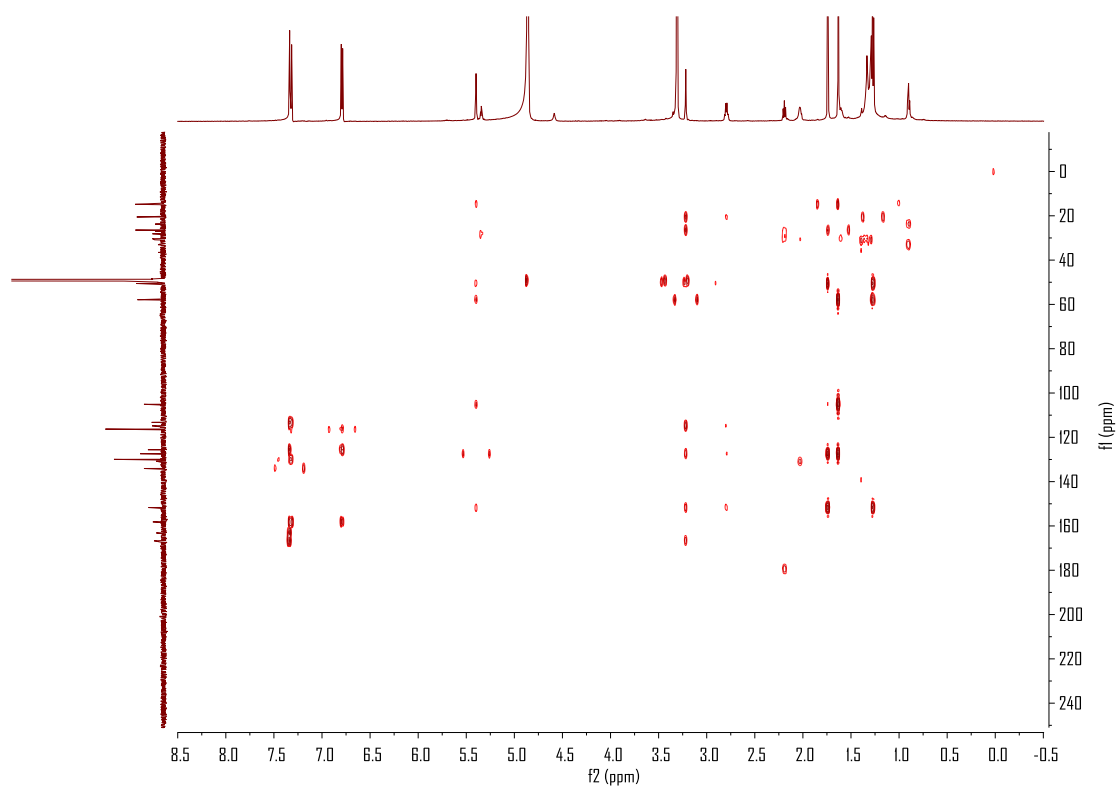

Figure S5. HMBC spectrum of **1a** in CD<sub>3</sub>OD

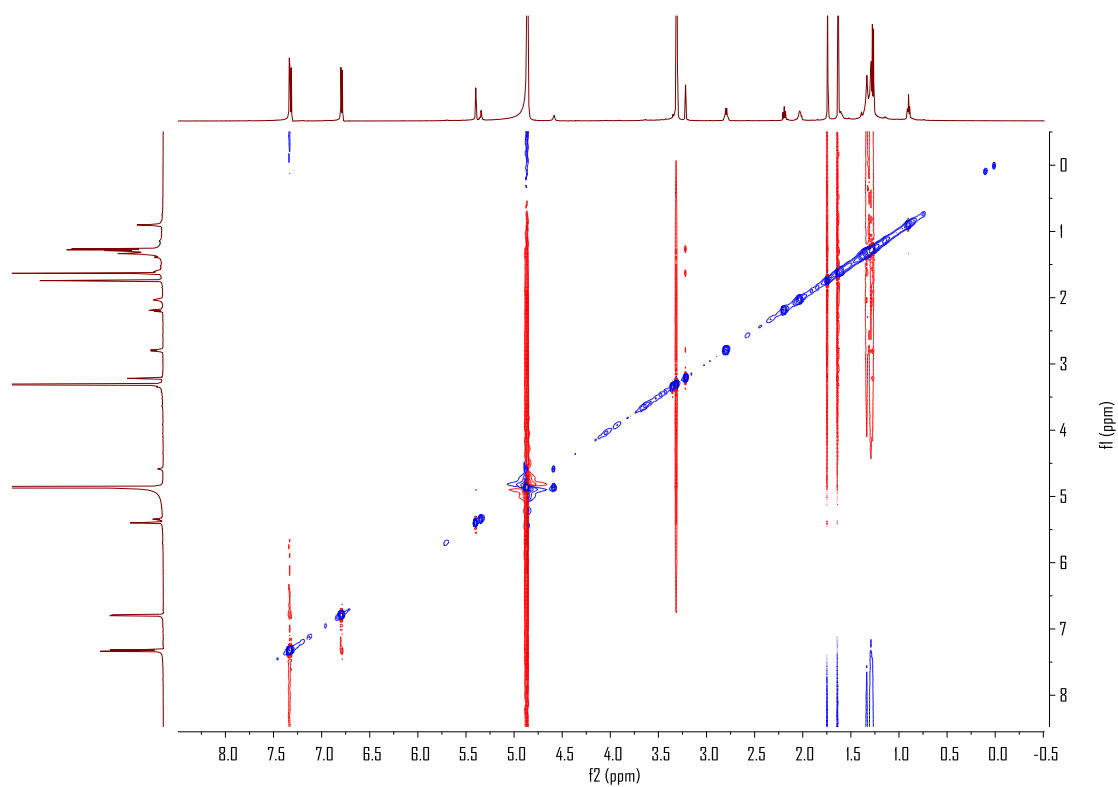

Figure S6. NOESY spectrum of **1a** in CD<sub>3</sub>OD

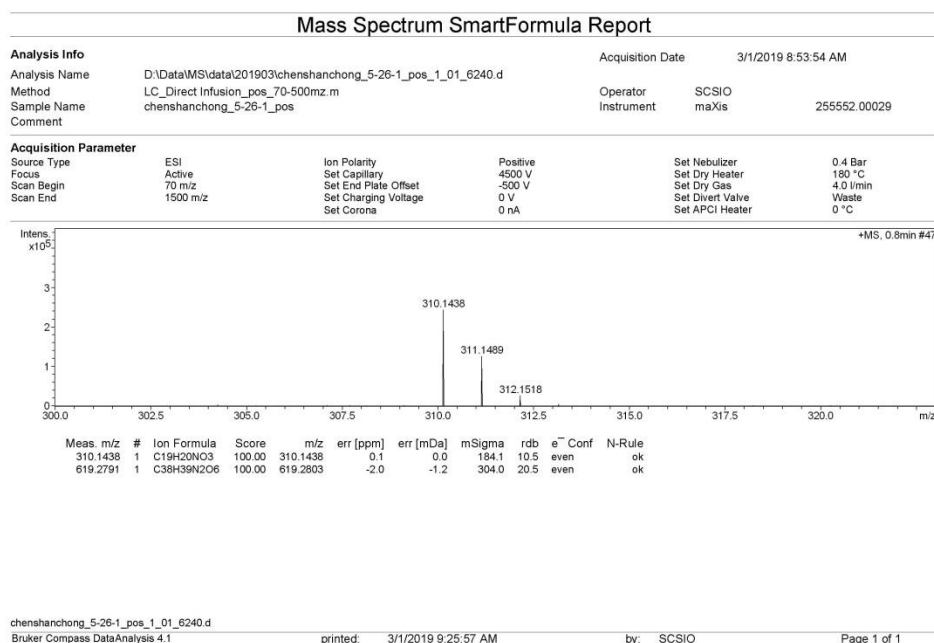

Figure S7. HRESIMS spectrum of **1a**

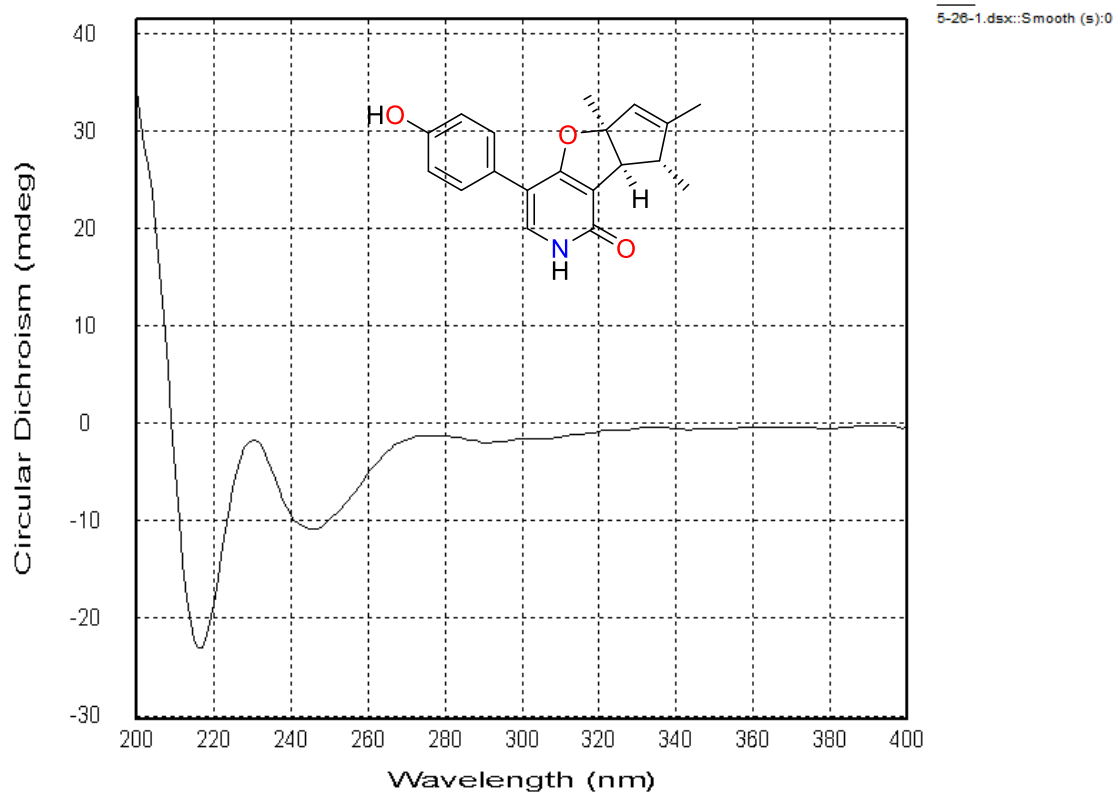

Figure S8. CD spectrum of **1a**

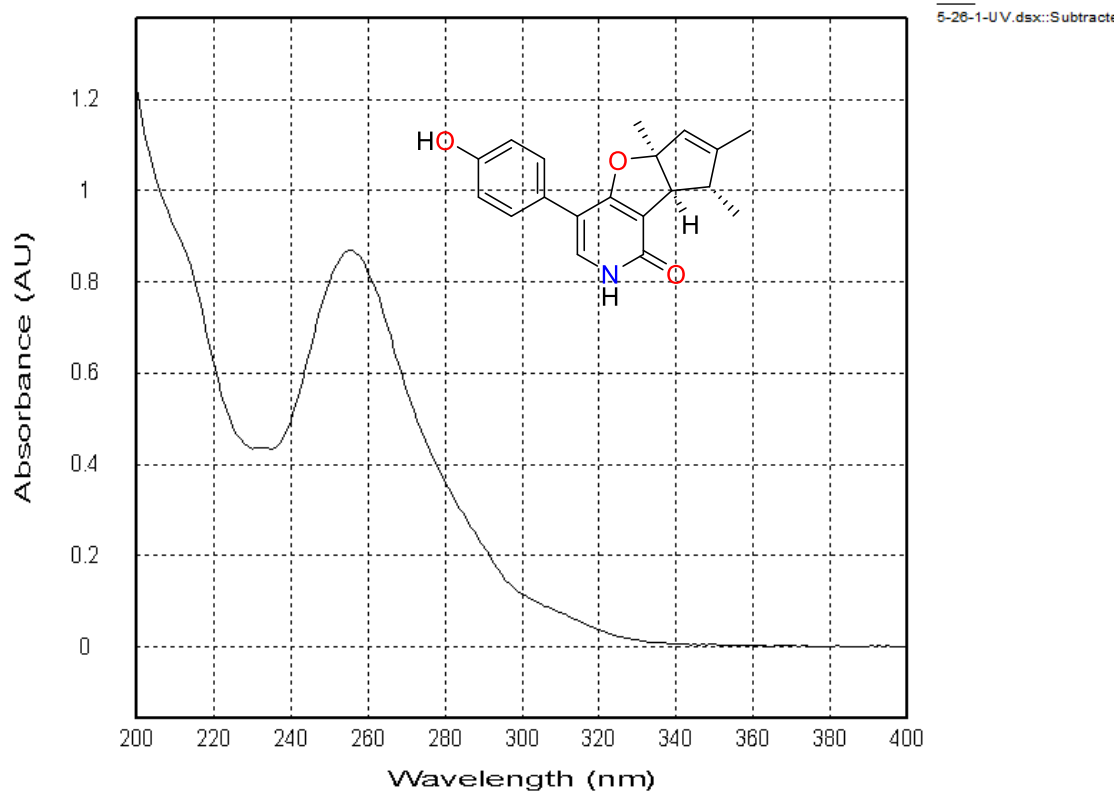

Figure S9. UV spectrum of **1a**

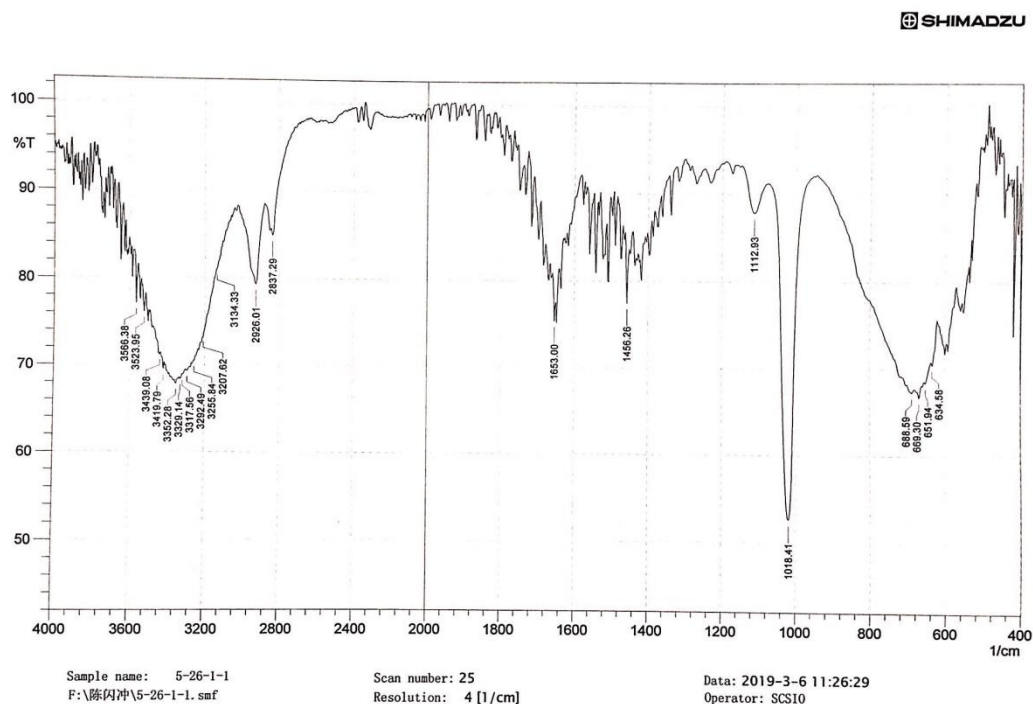

Figure S10. IR spectrum of **1a**

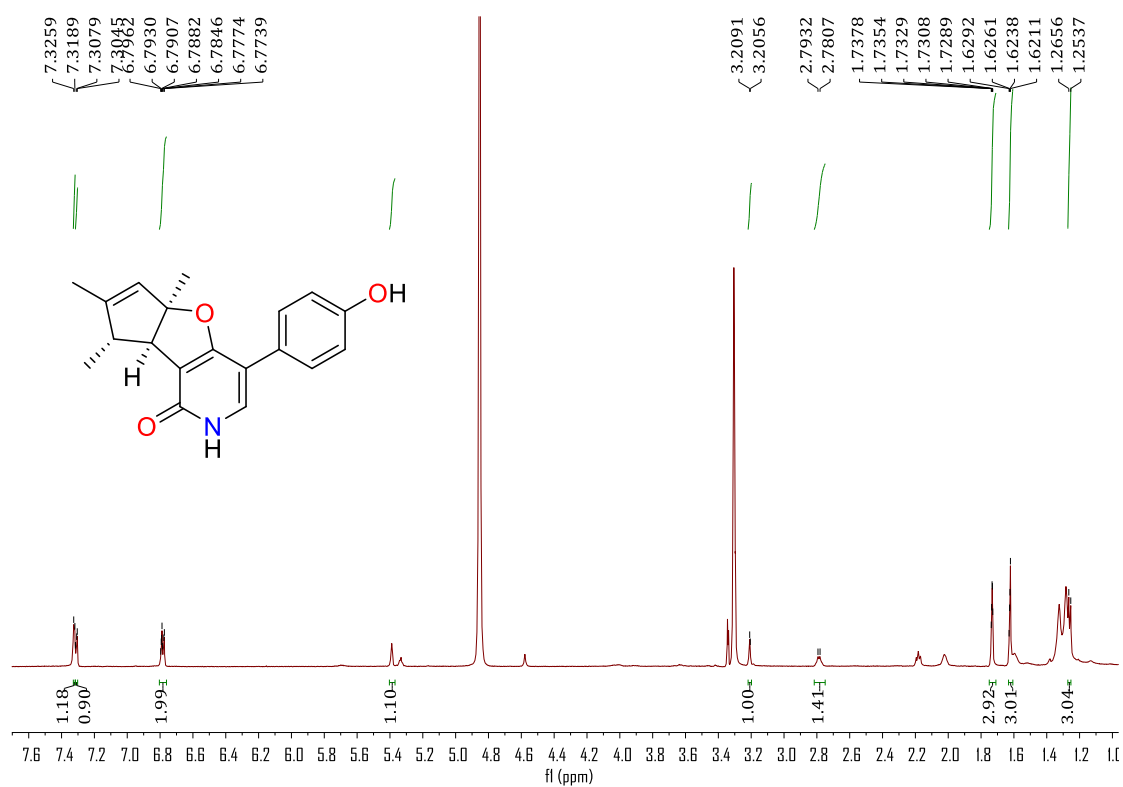

Figure S11. <sup>1</sup>H NMR spectrum (600 MHz, CD<sub>3</sub>OD) of **1b**

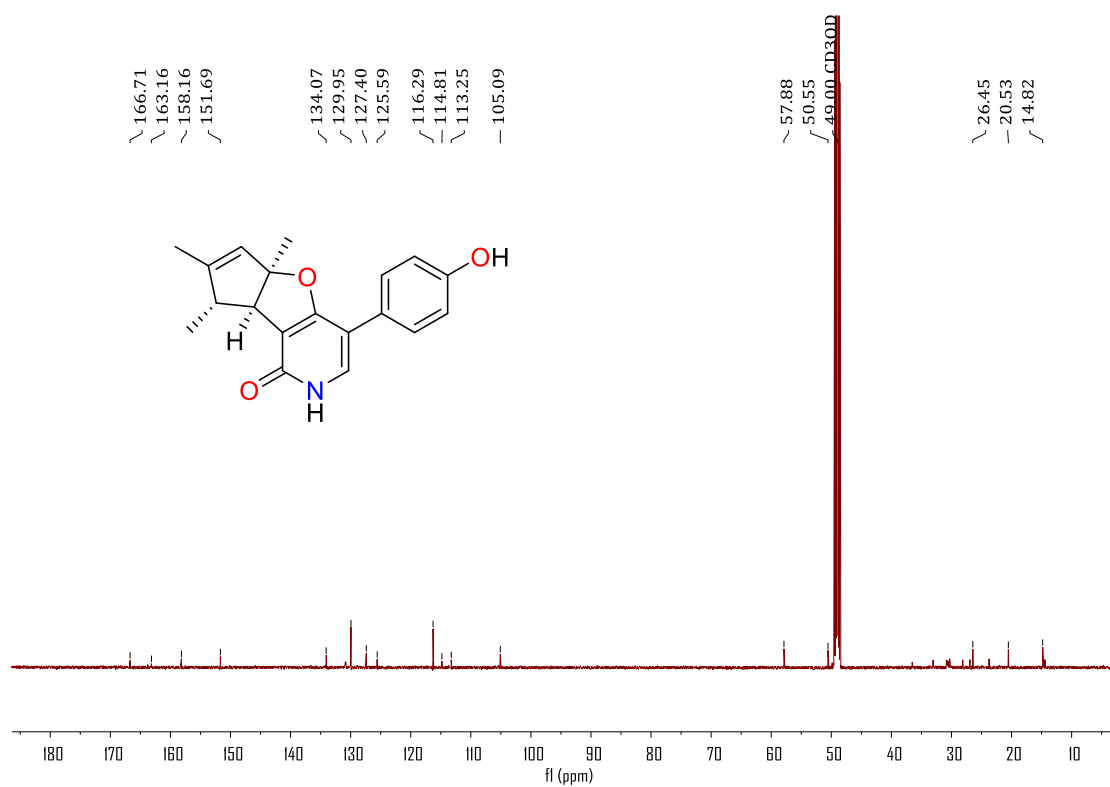

Figure S12. <sup>13</sup>C NMR spectrum (150 MHz, CD<sub>3</sub>OD) of **1b**

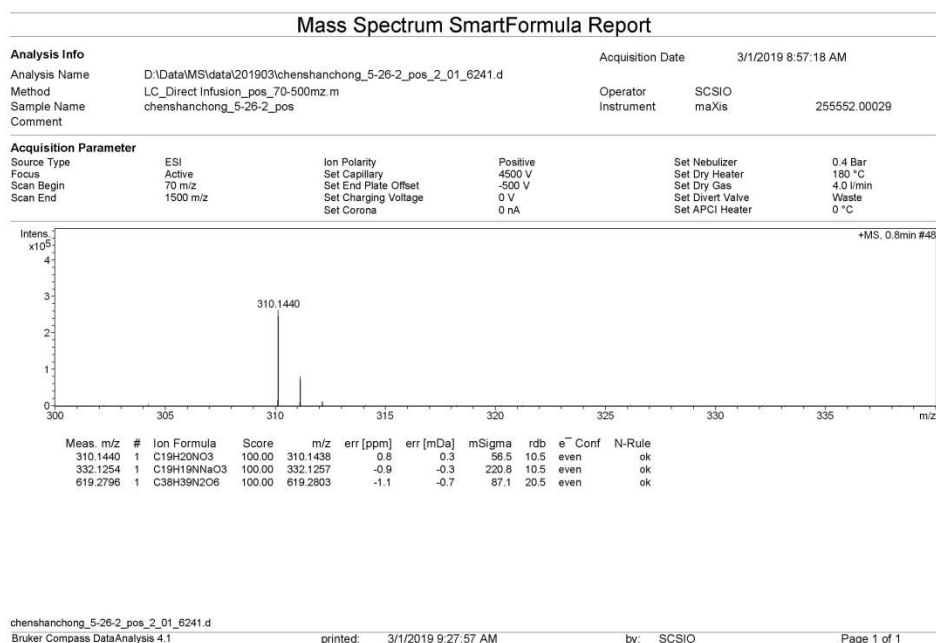

Figure S13. HRESIMS spectrum of **1b**

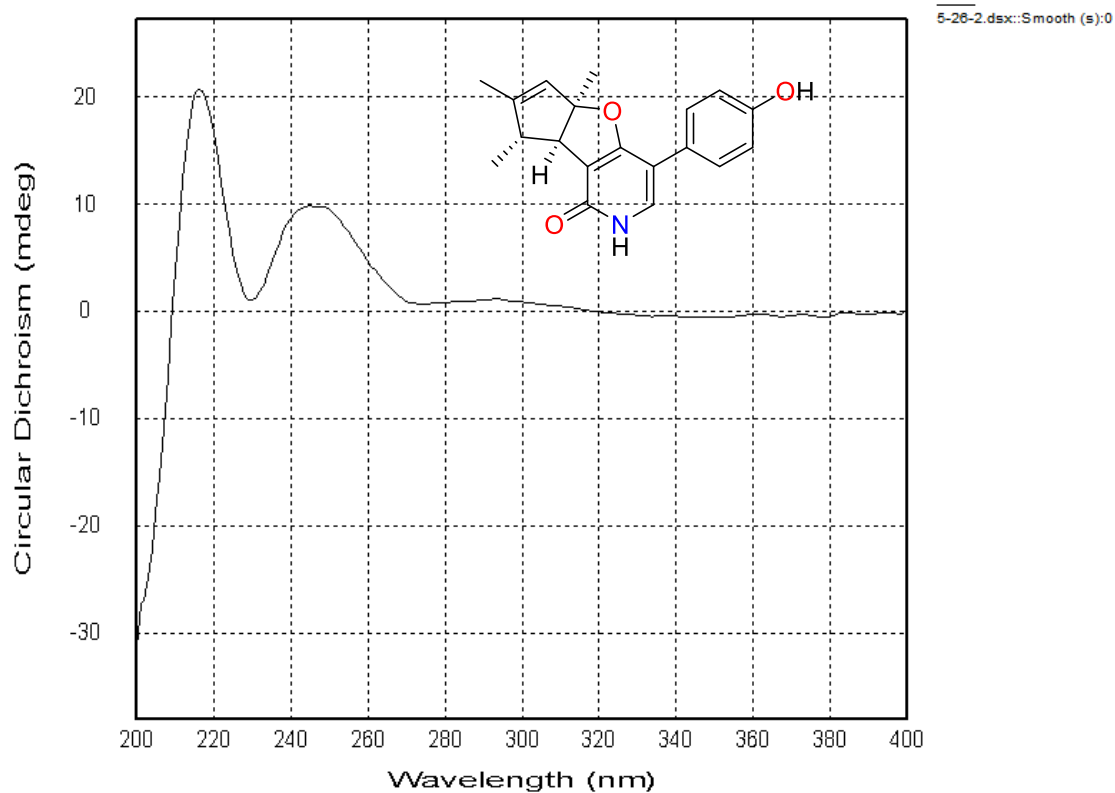

Figure S14. CD spectrum of **1b**

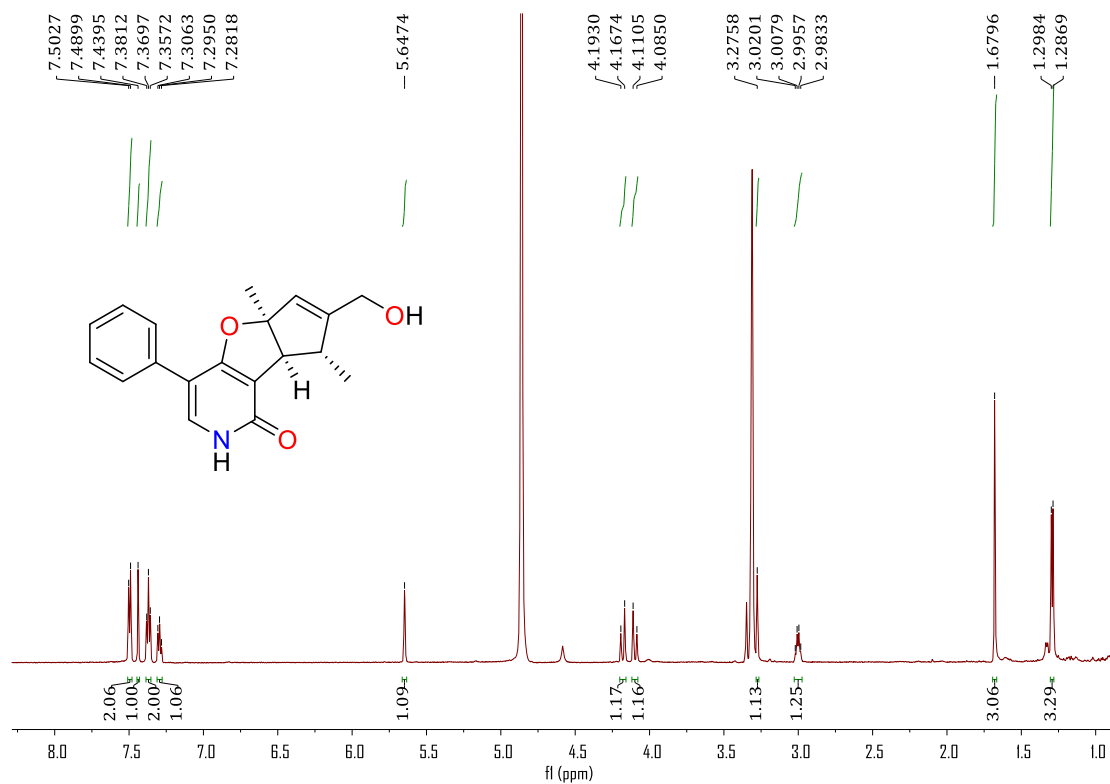

Figure S15.  $^1\text{H}$  NMR spectrum (600 MHz,  $\text{CD}_3\text{OD}$ ) of **2a**

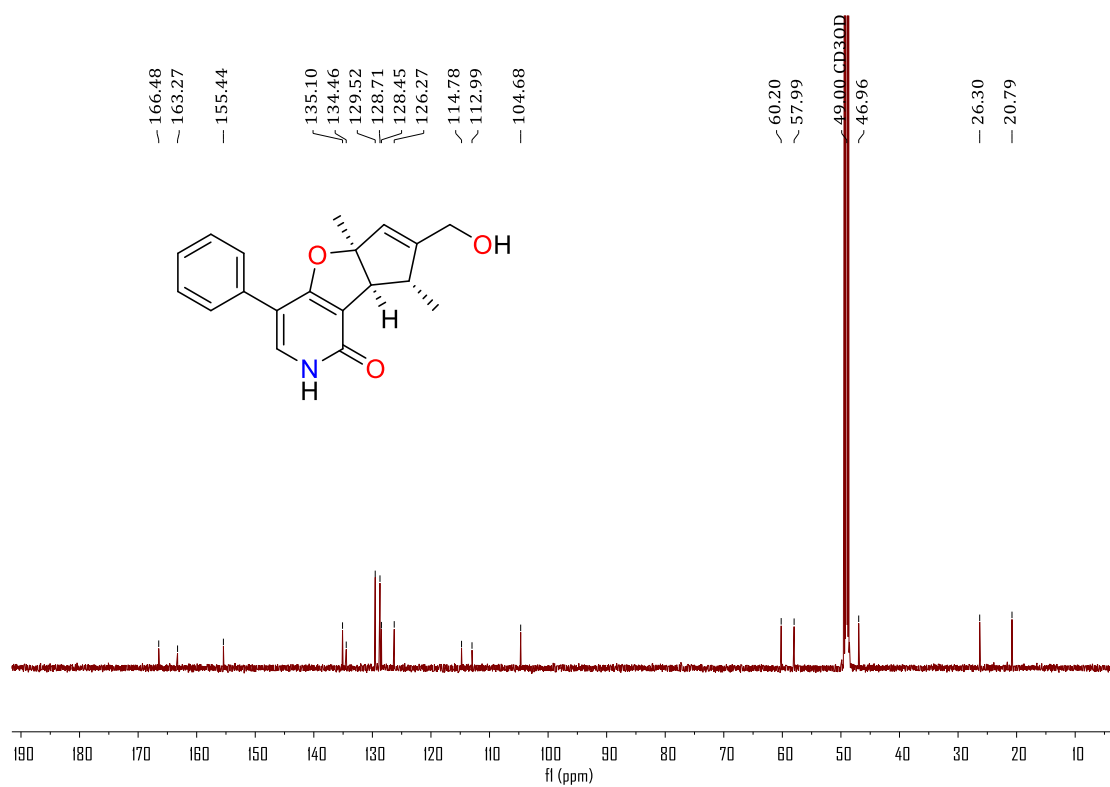

Figure S16.  $^{13}\text{C}$  NMR spectrum (150 MHz,  $\text{CD}_3\text{OD}$ ) of **2a**



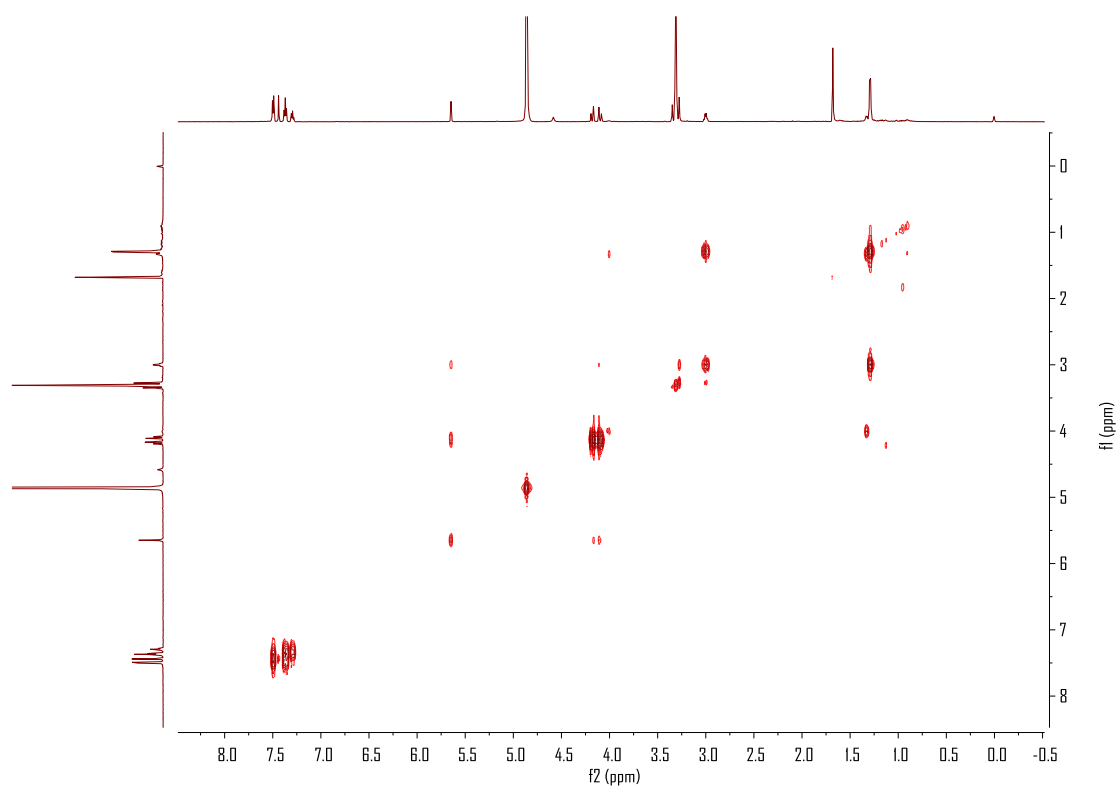

Figure S17.  $^1\text{H}$ - $^1\text{H}$  COSY spectrum of **2a** in  $\text{CD}_3\text{OD}$

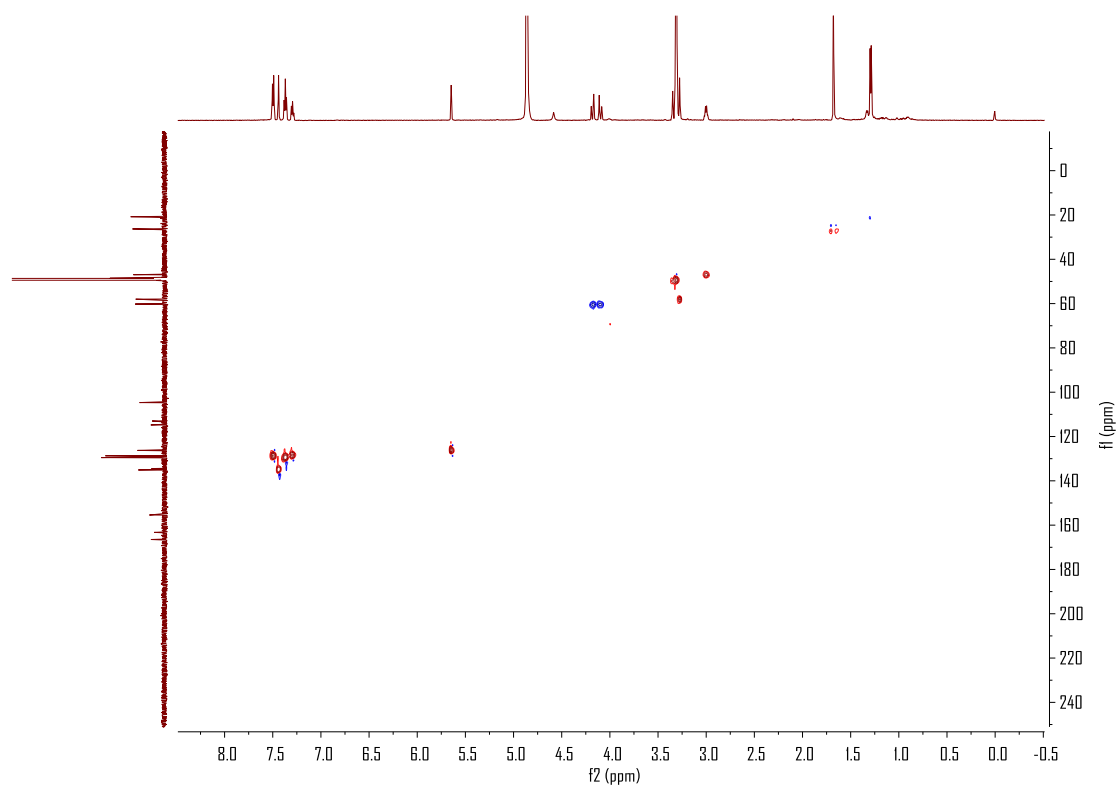

Figure S18. HSQC spectrum of **2a** in  $\text{CD}_3\text{OD}$

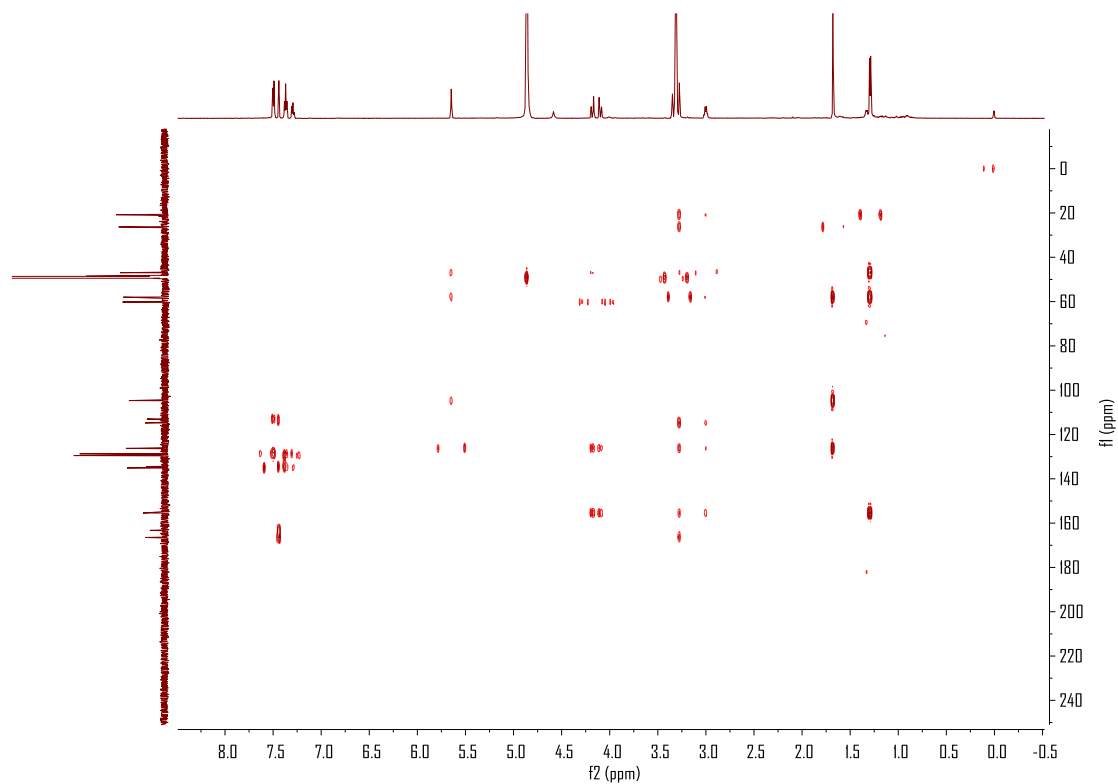

Figure S19. HMBC spectrum of **2a** in CD<sub>3</sub>OD

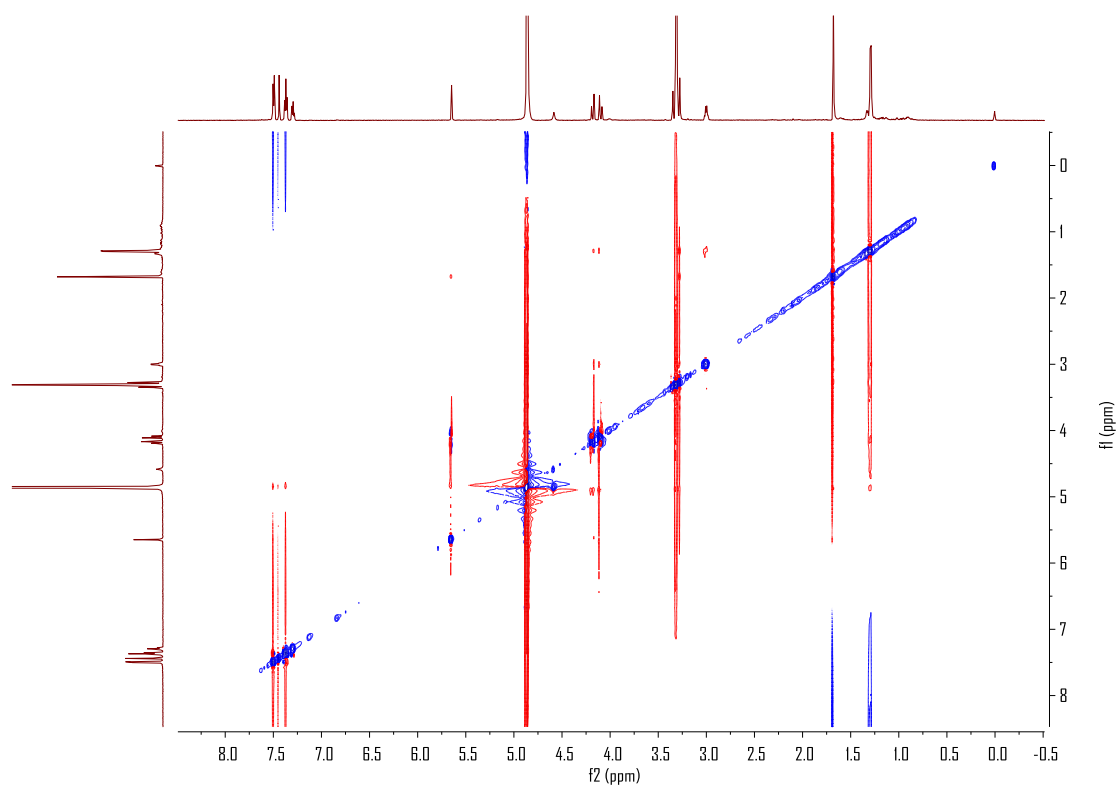

Figure S20. NOESY spectrum of **2a** in CD<sub>3</sub>OD

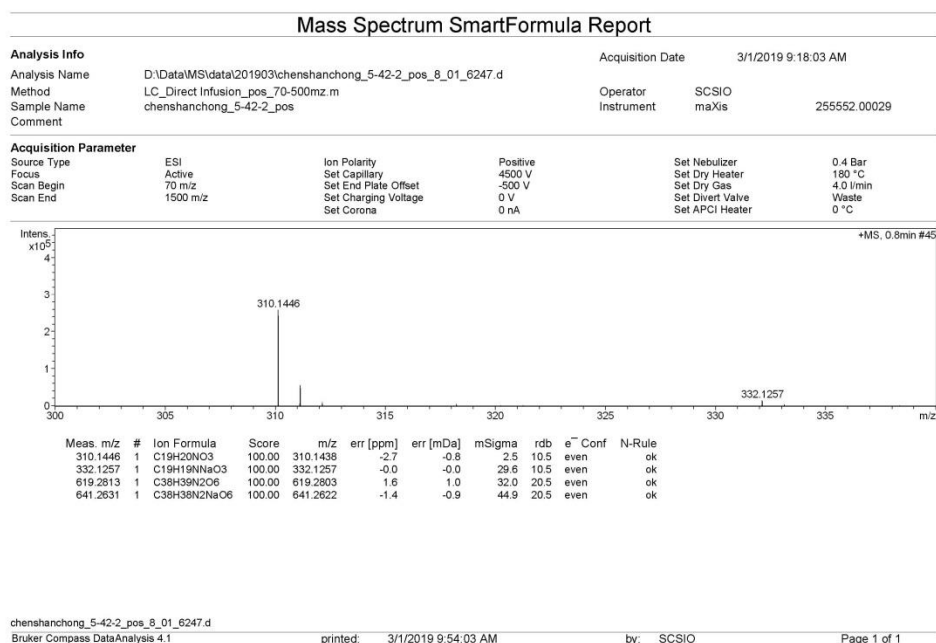

Figure S21. HRESIMS spectrum of **2a**

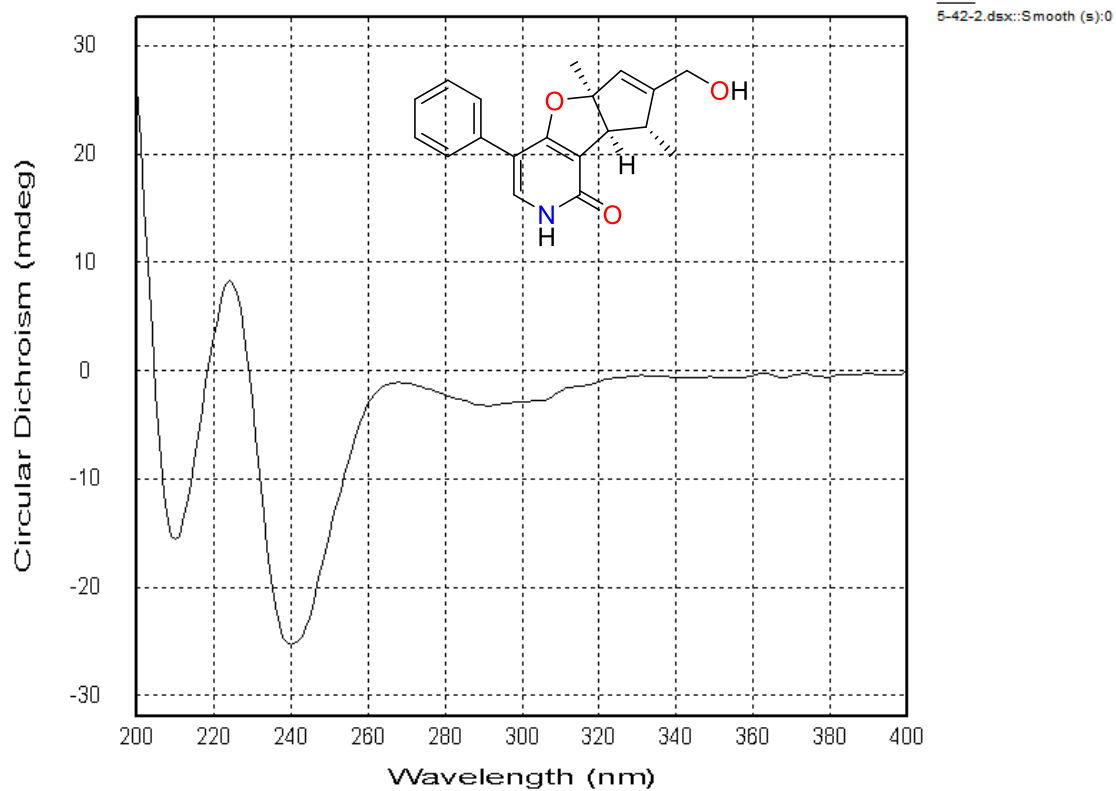

Figure S22. CD spectrum of **2a**

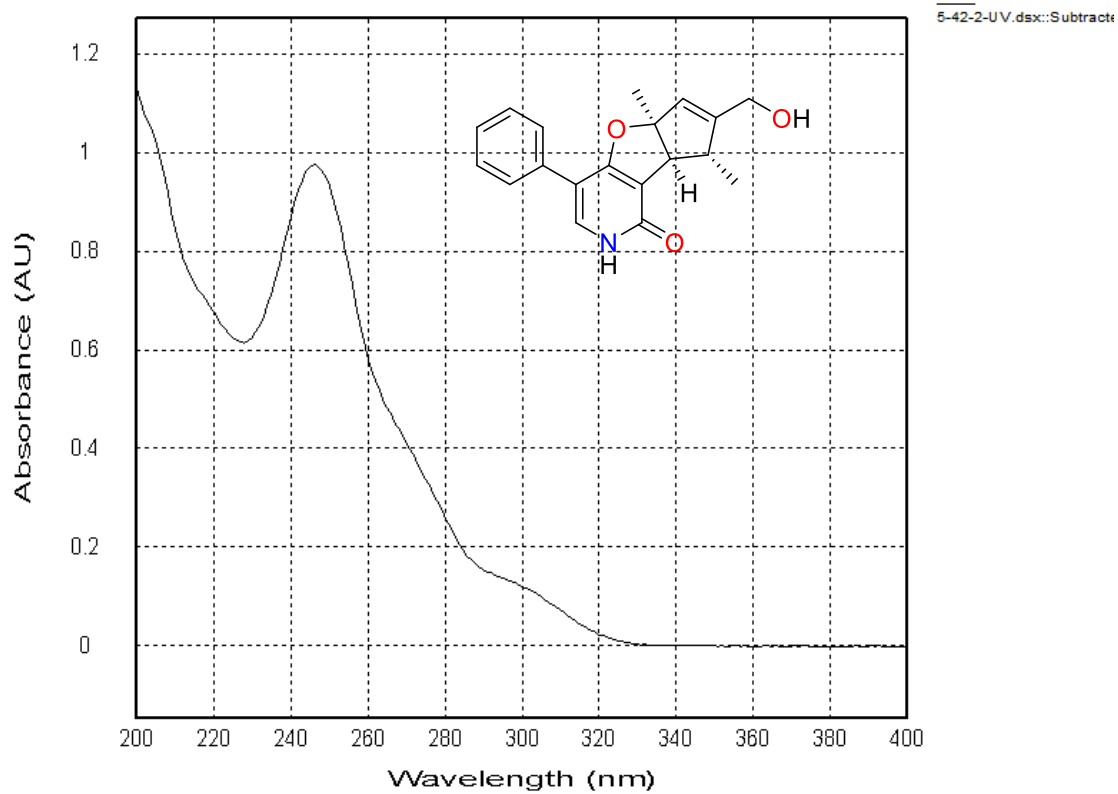

Figure S23. UV spectrum of **2a**

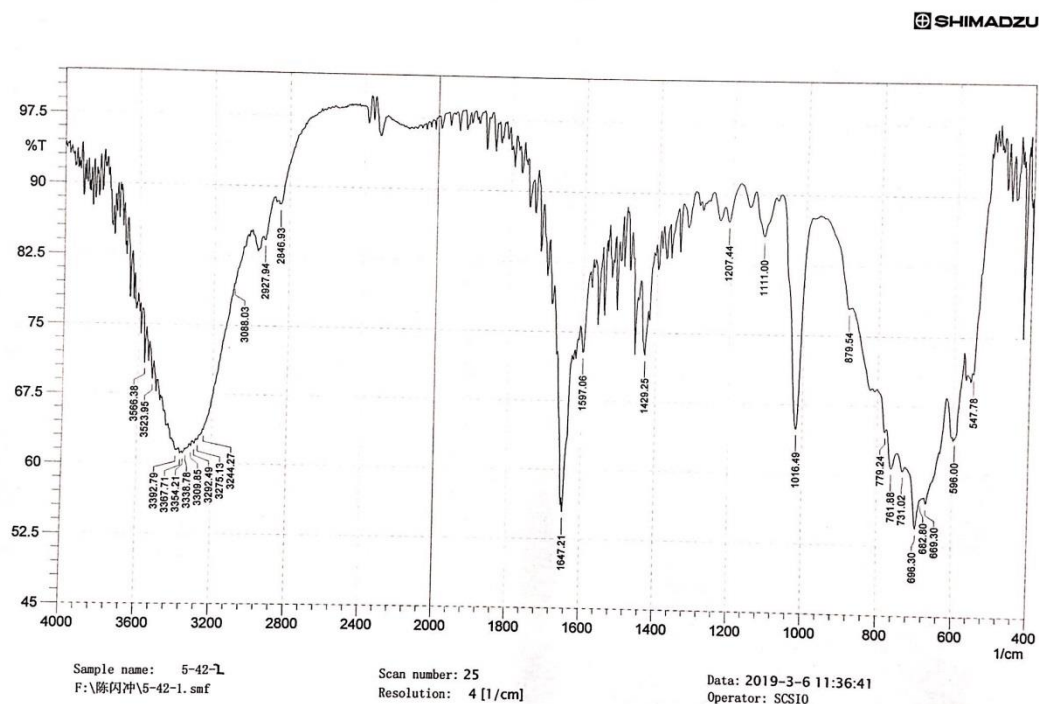

Figure S24. IR spectrum of **2a**

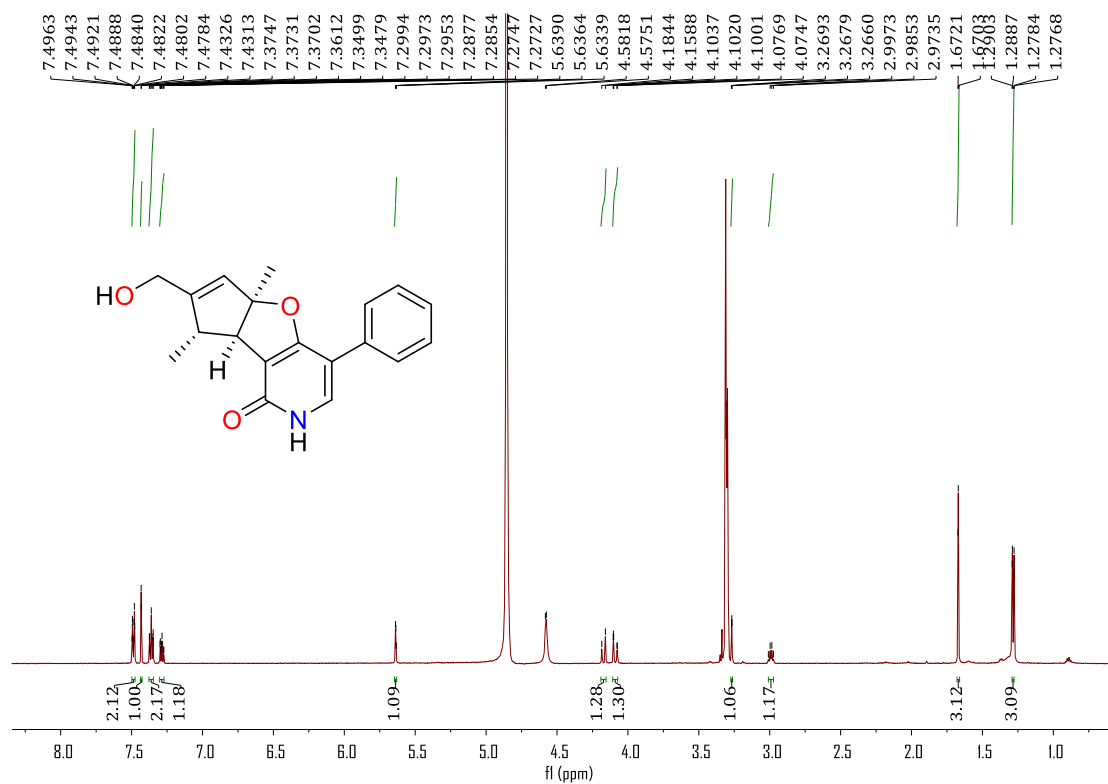

Figure S25. <sup>1</sup>H NMR spectrum (600 MHz, CD<sub>3</sub>OD) of **2b**

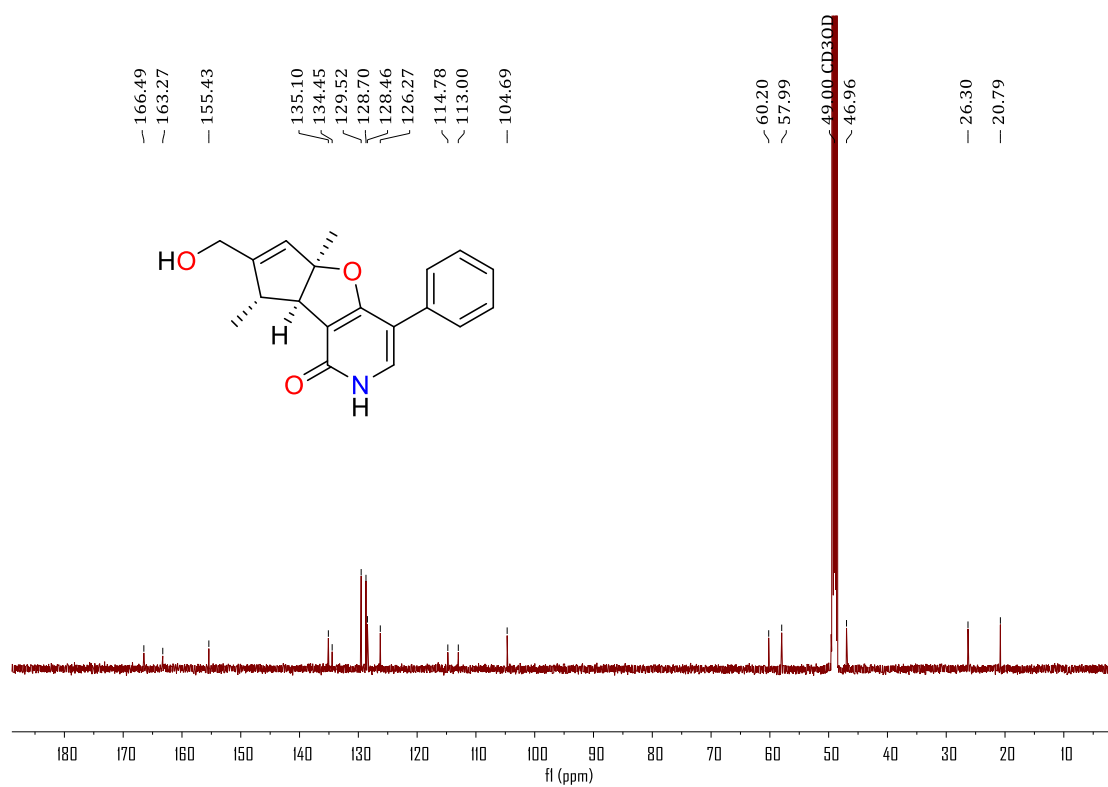

Figure S26. <sup>13</sup>C NMR spectrum (150 MHz, CD<sub>3</sub>OD) of **2b**

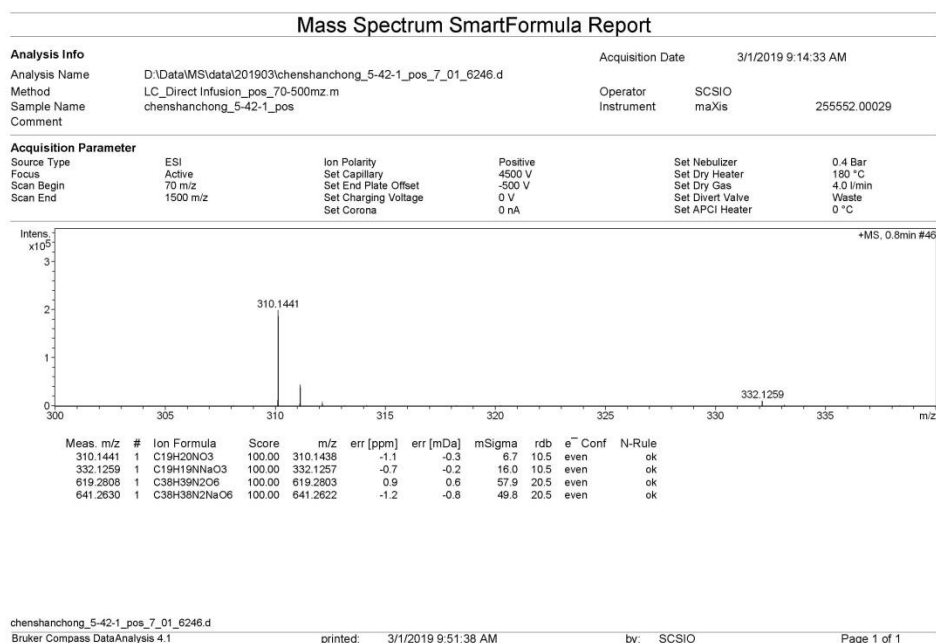

Figure S27. HRESIMS spectrum of **2b**

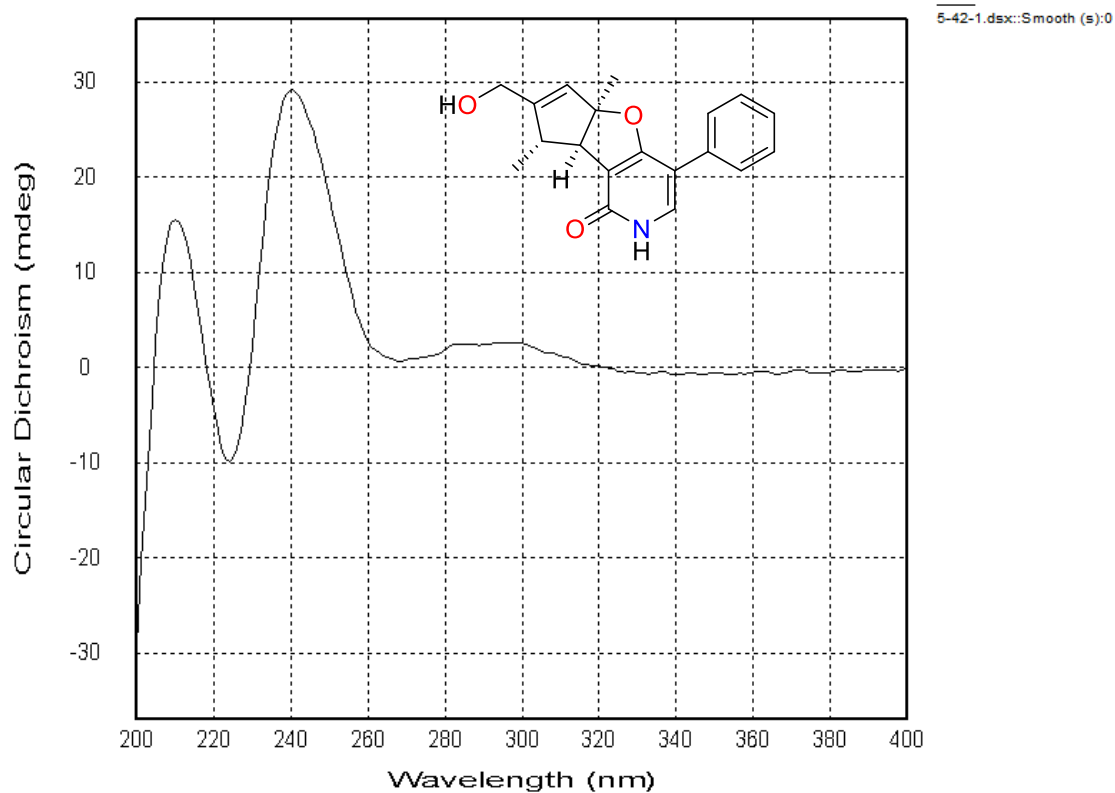

Figure S28. CD spectrum of **2b**

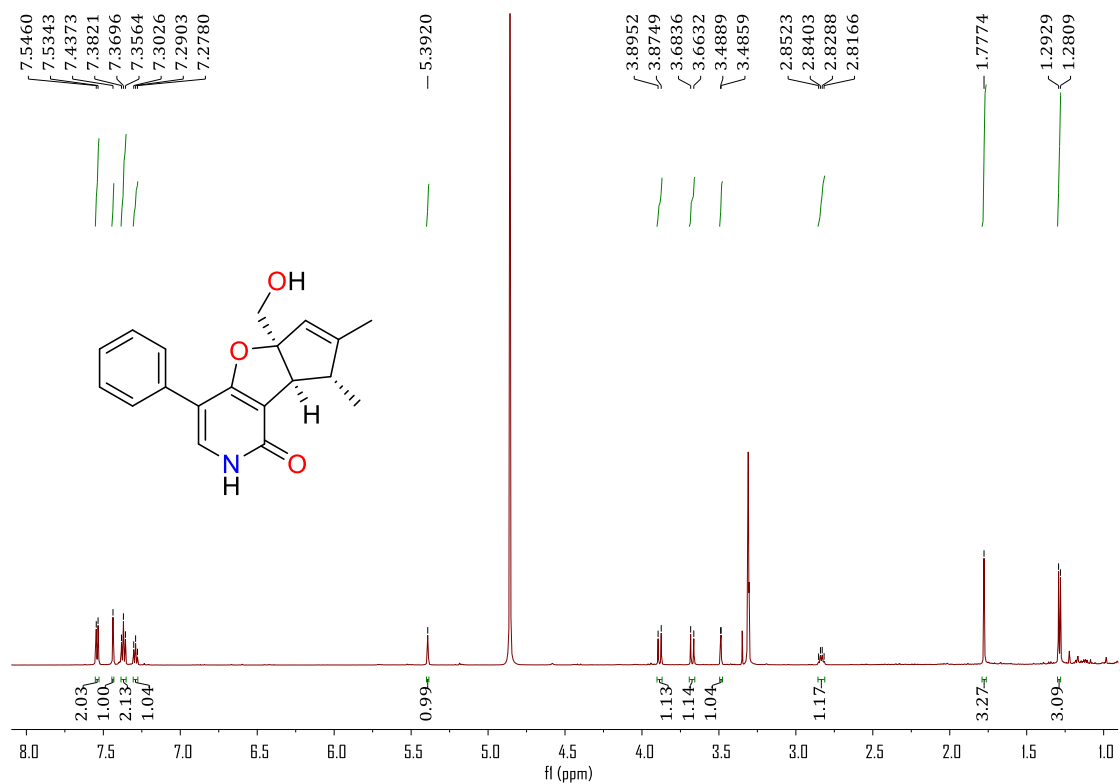

Figure S29. <sup>1</sup>H NMR spectrum (600 MHz, CD<sub>3</sub>OD) of **3a**

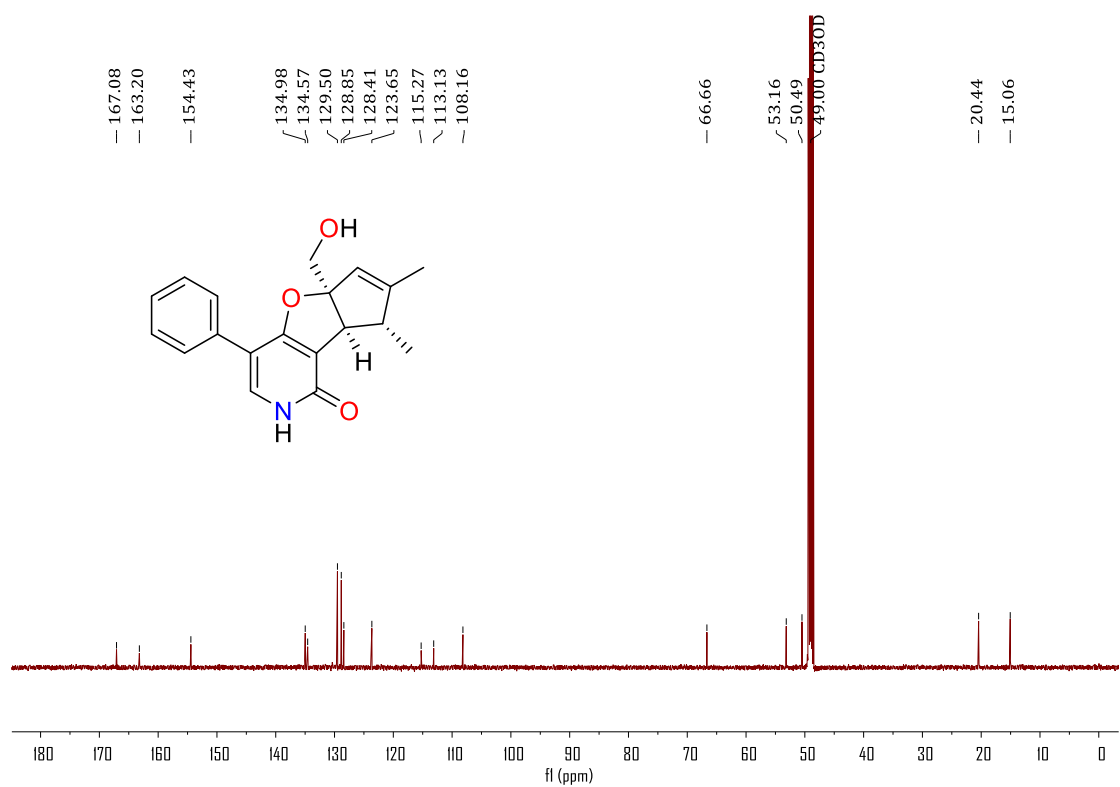

Figure S30. <sup>13</sup>C NMR spectrum (150 MHz, CD<sub>3</sub>OD) of **3a**

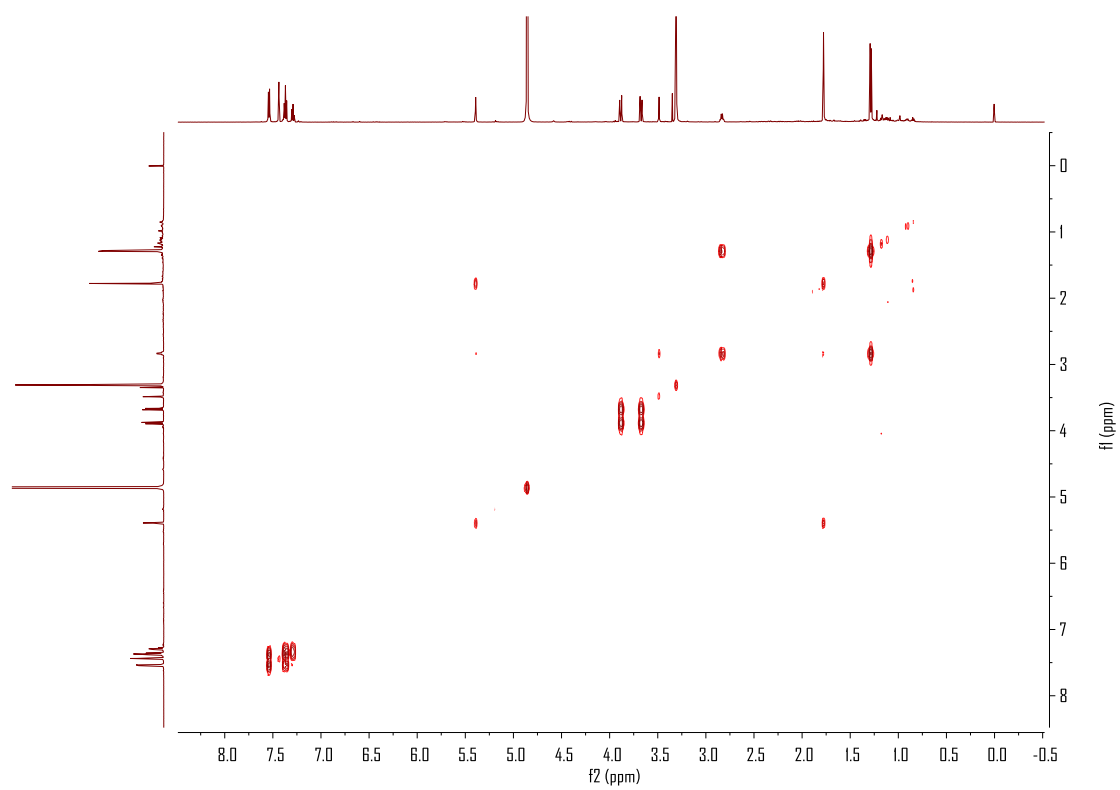

Figure S31.  $^1\text{H}$ - $^1\text{H}$  COSY spectrum of **3a** in  $\text{CD}_3\text{OD}$

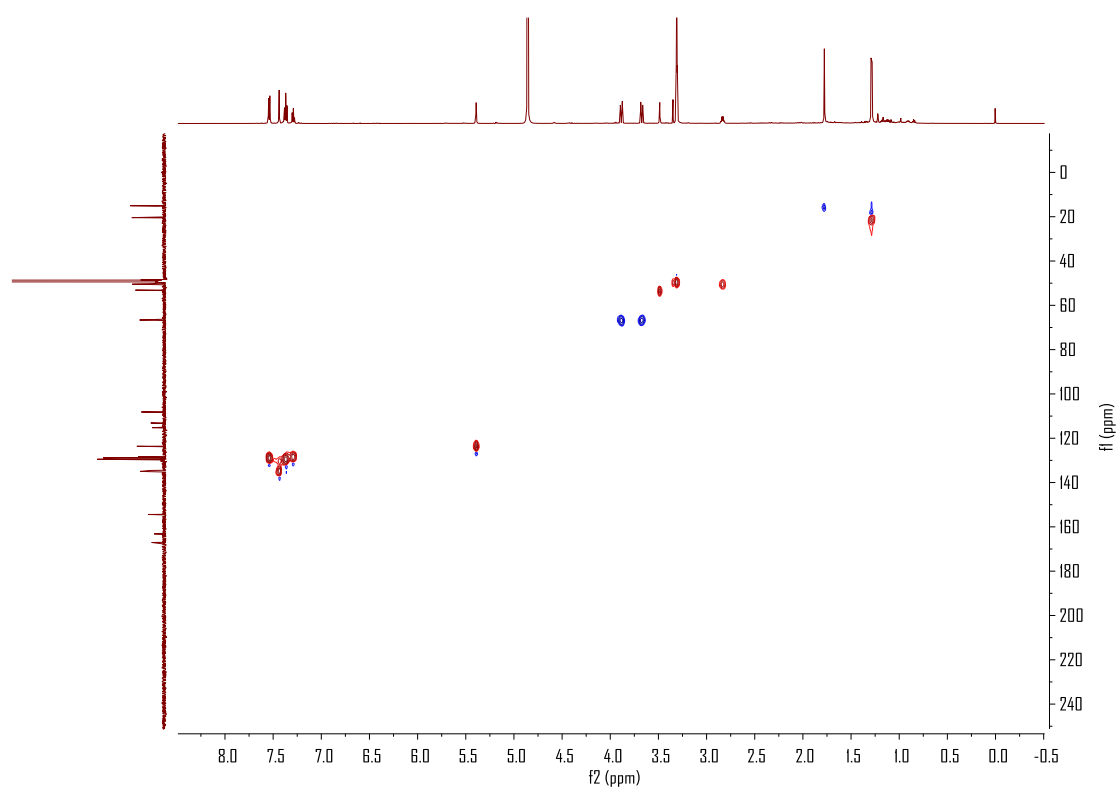

Figure S32. HSQC spectrum of **3a** in  $\text{CD}_3\text{OD}$



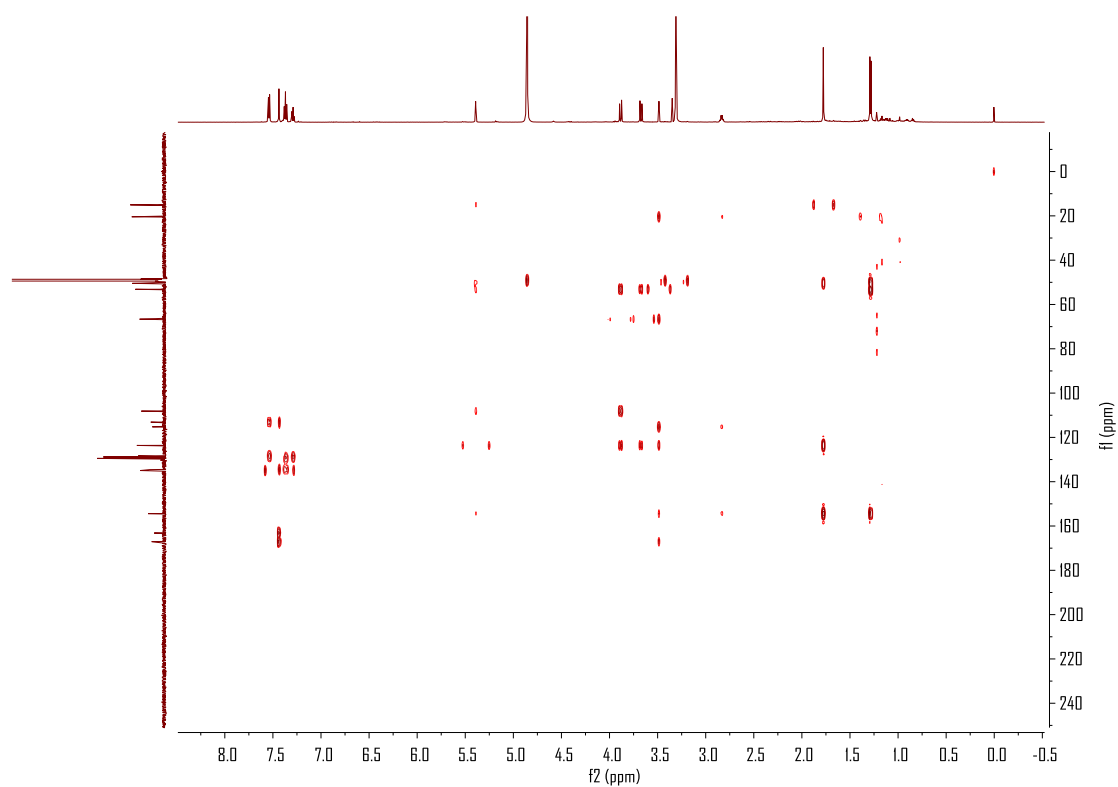

Figure S33. HMBC spectrum of **3a** in CD<sub>3</sub>OD

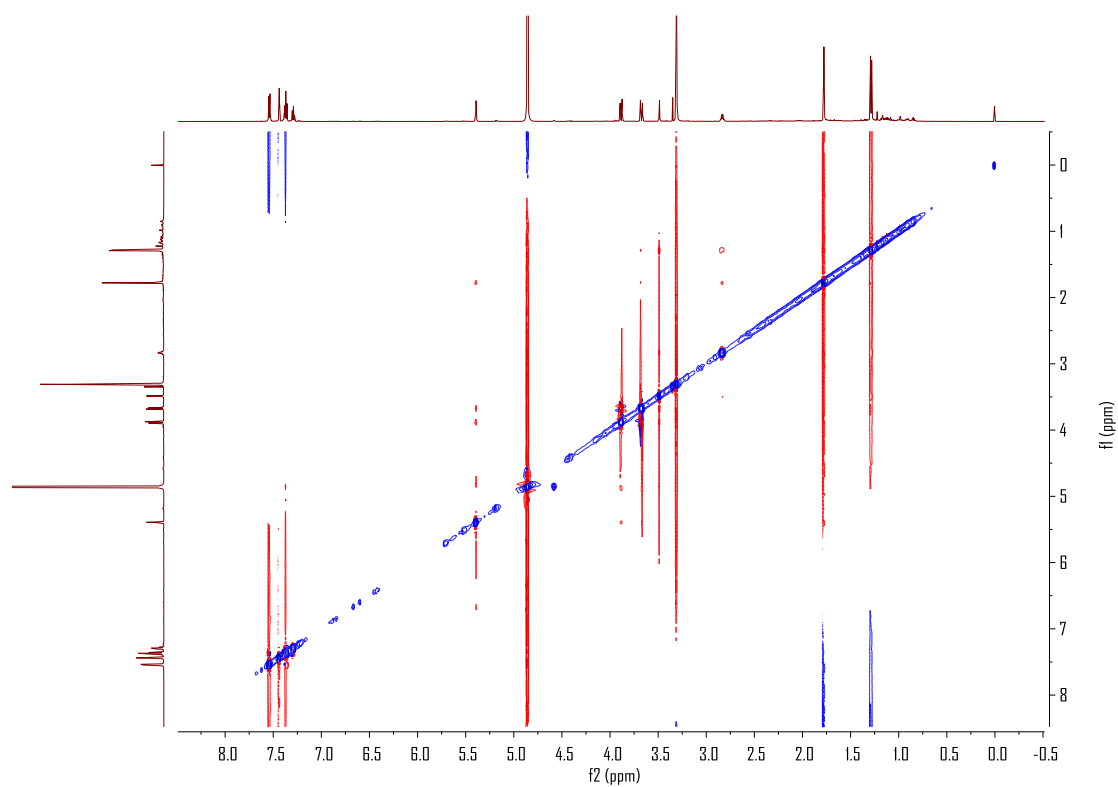

Figure S34. NOESY spectrum of **3a** in CD<sub>3</sub>OD

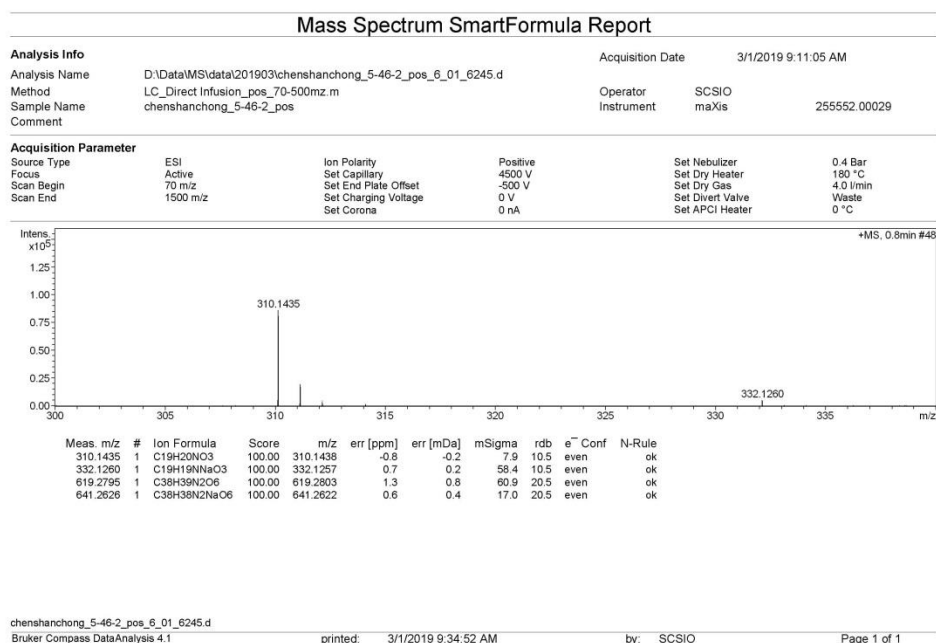

Figure S35. HRESIMS spectrum of **3a**

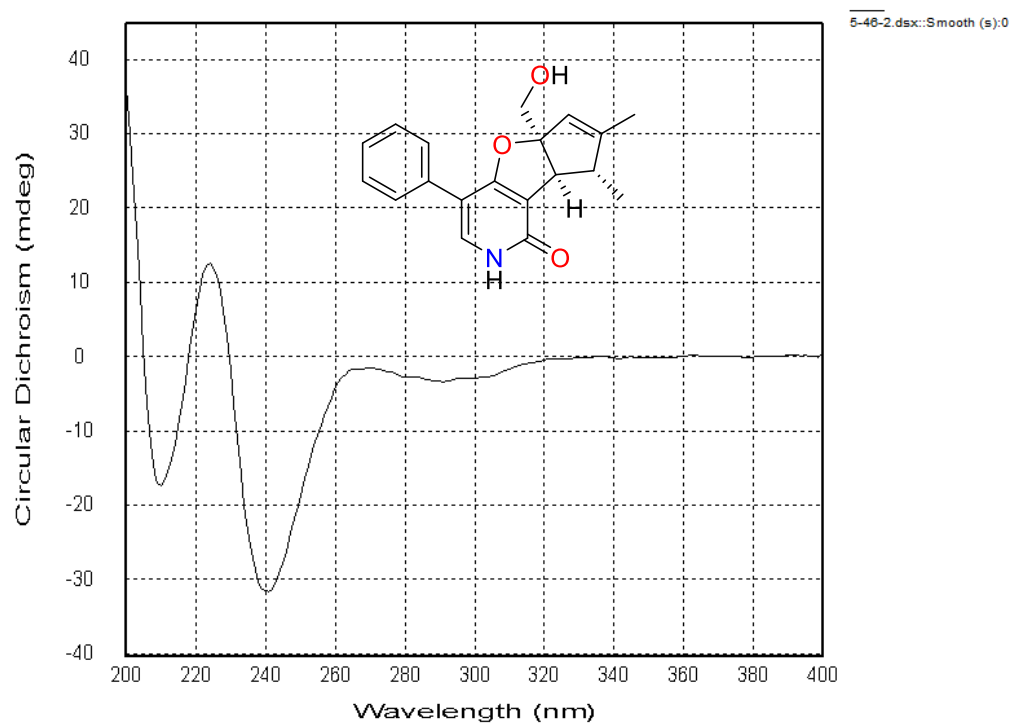

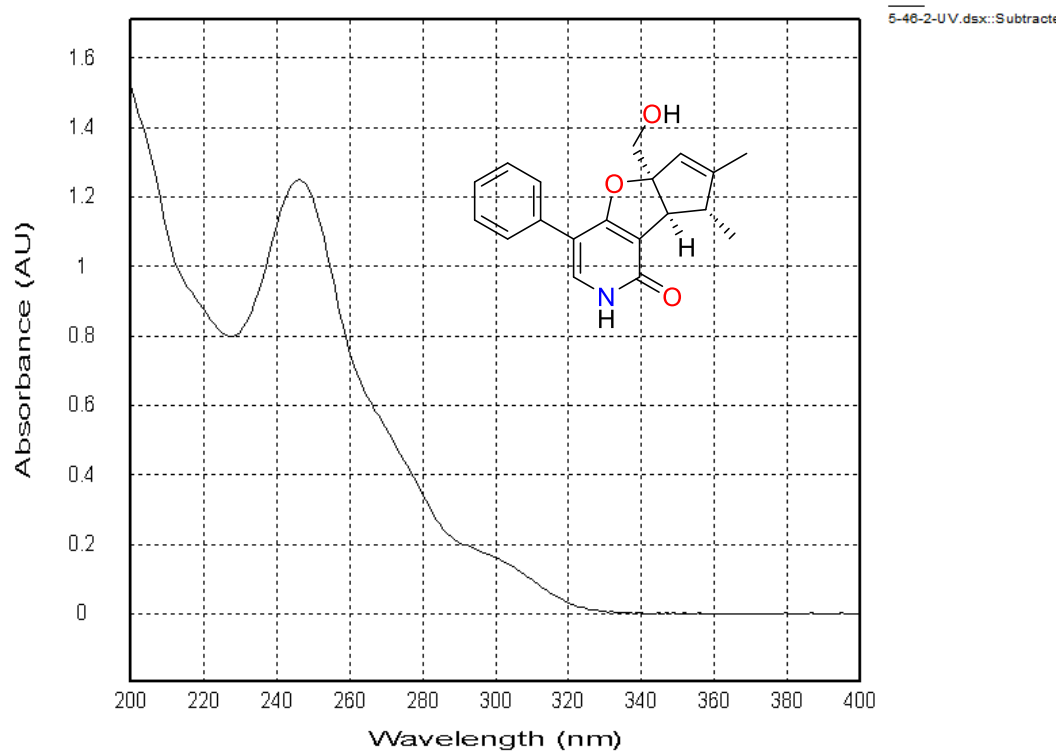

Figure S37. UV spectrum of **3a**

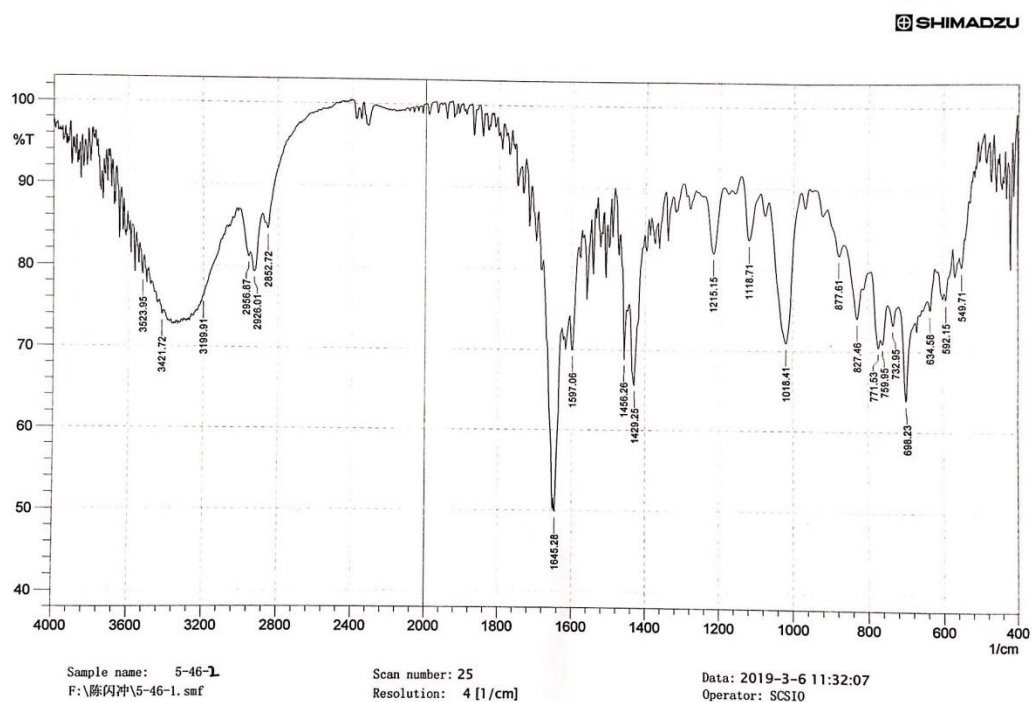

Figure S38. IR spectrum of **3a**

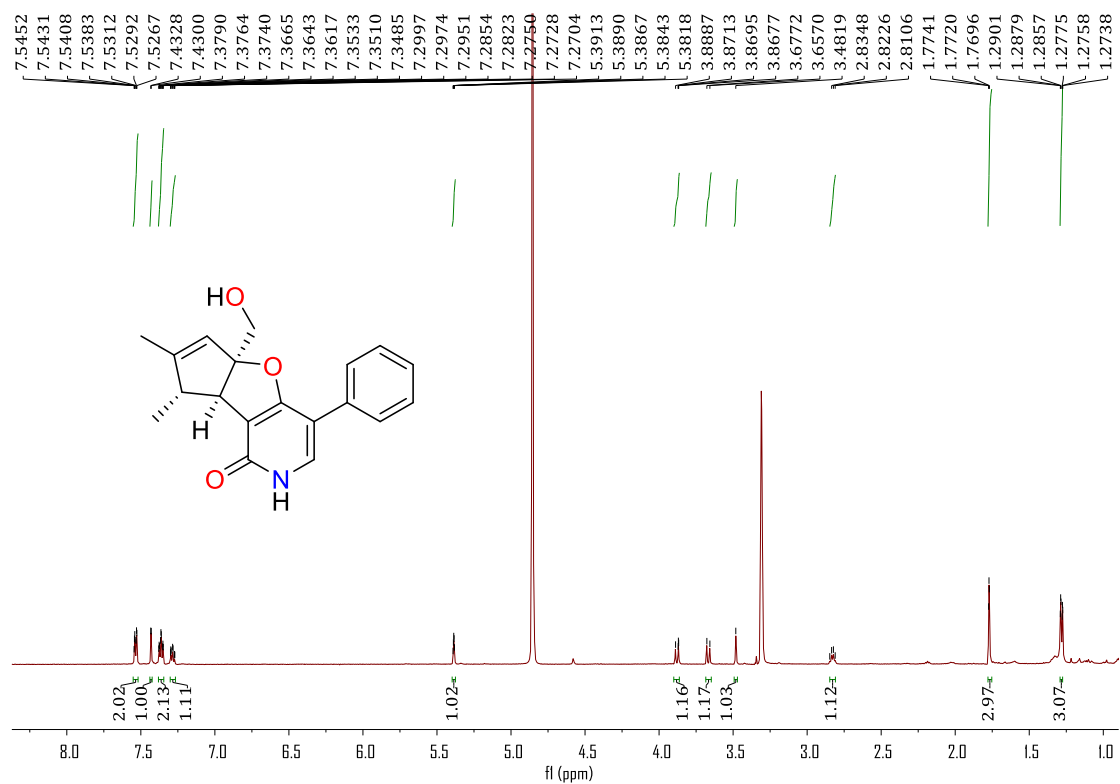

Figure S39. <sup>1</sup>H NMR spectrum (600 MHz, CD<sub>3</sub>OD) of **3b**

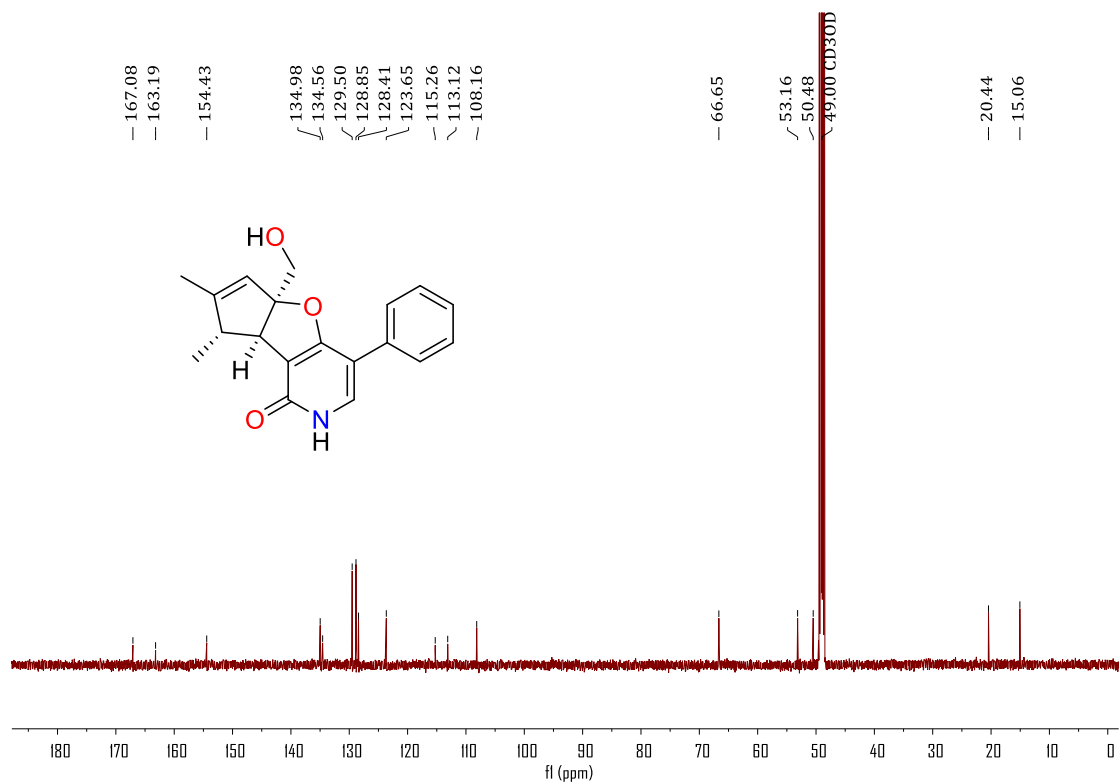

Figure S40. <sup>13</sup>C NMR spectrum (150 MHz, CD<sub>3</sub>OD) of **3b**

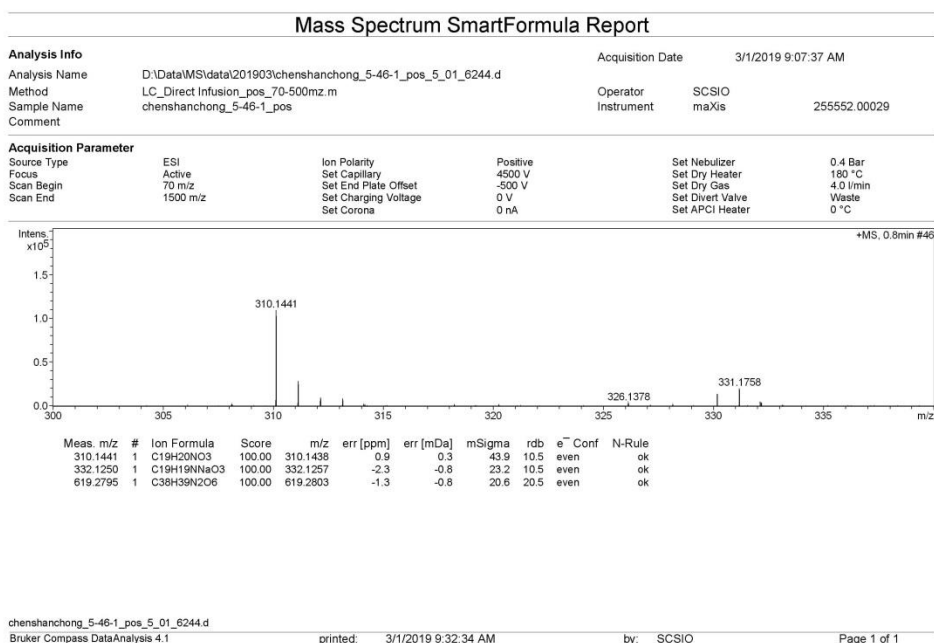

Figure S41. HRESIMS spectrum of **3b**

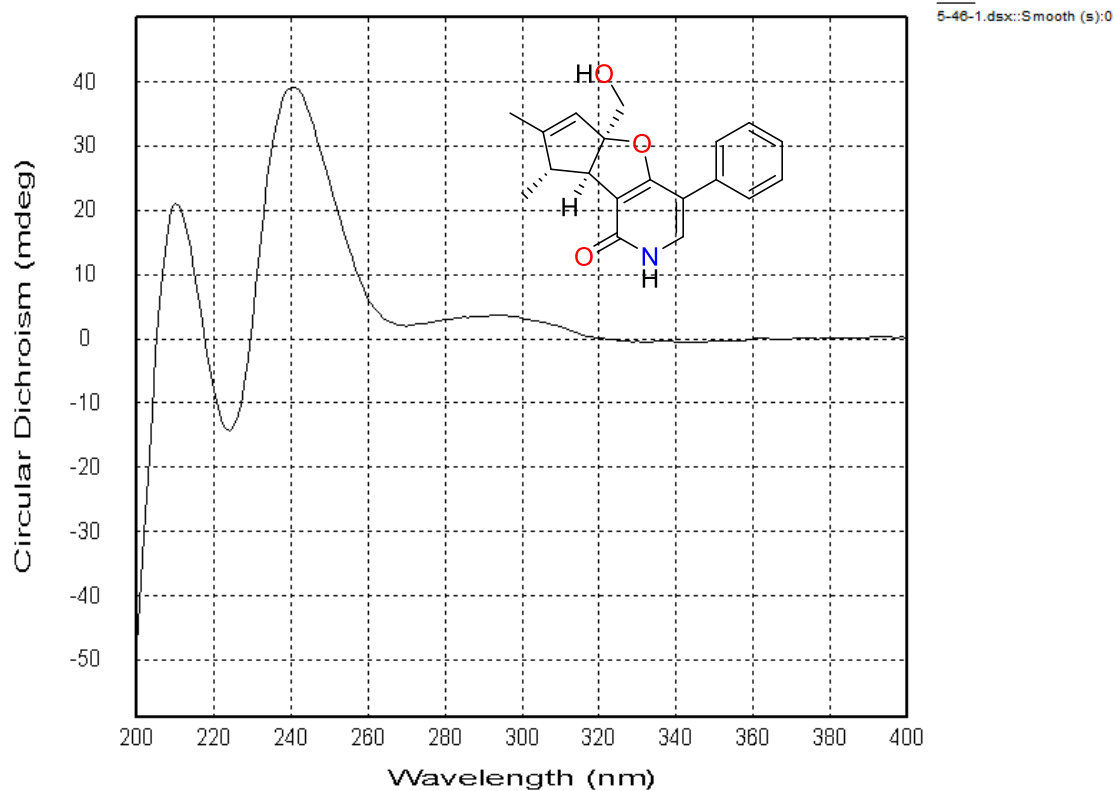

Figure S42. CD spectrum of **3b**

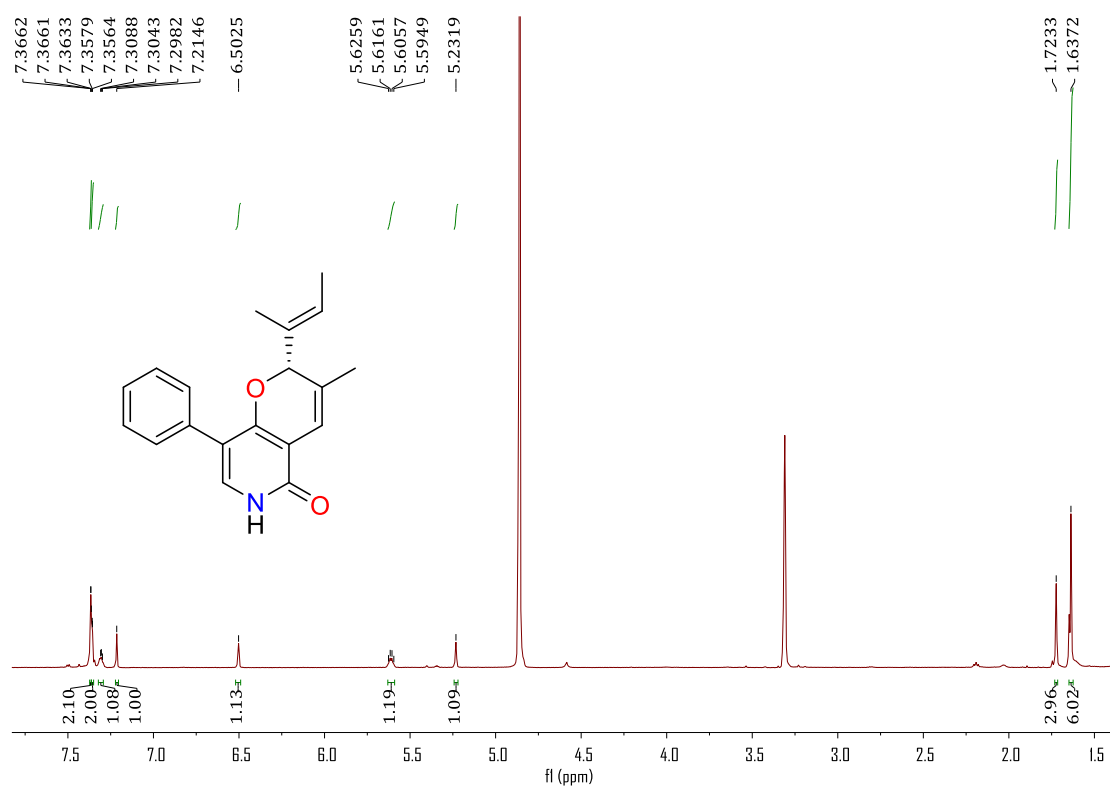

Figure S43. <sup>1</sup>H NMR spectrum (600 MHz, CD<sub>3</sub>OD) of 4a

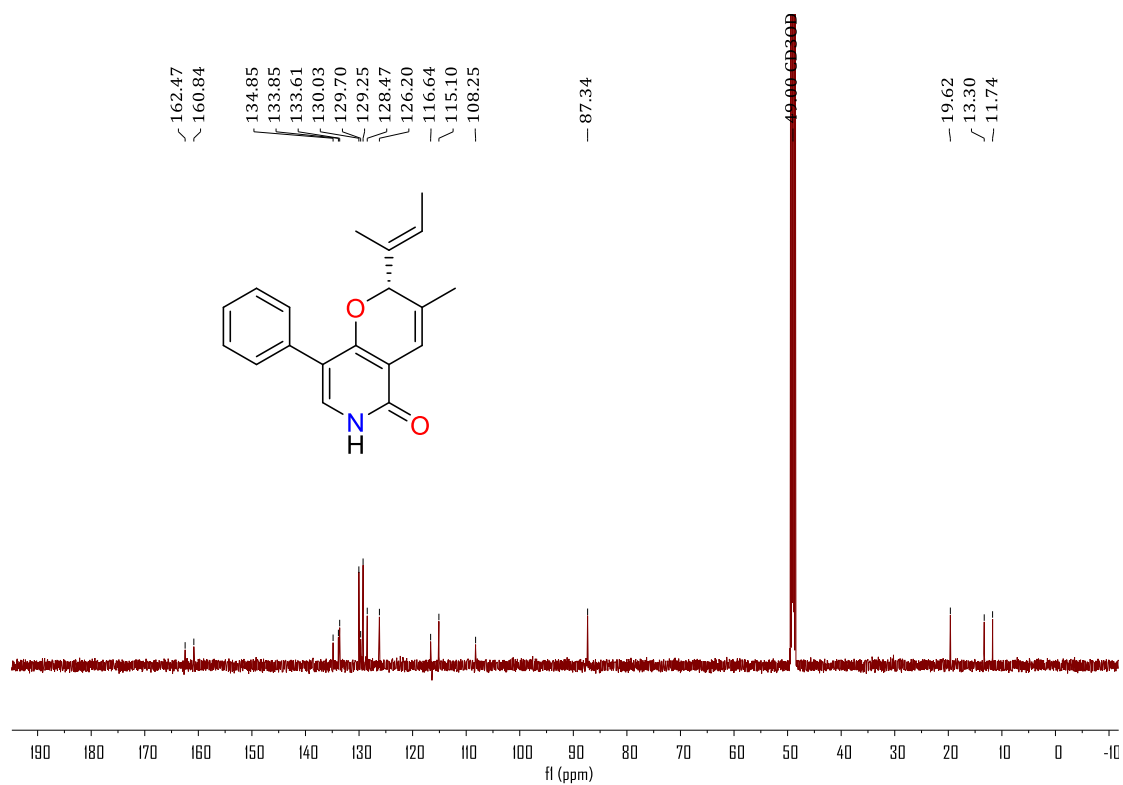

Figure S44. <sup>13</sup>C NMR spectrum (150 MHz, CD<sub>3</sub>OD) of 4a

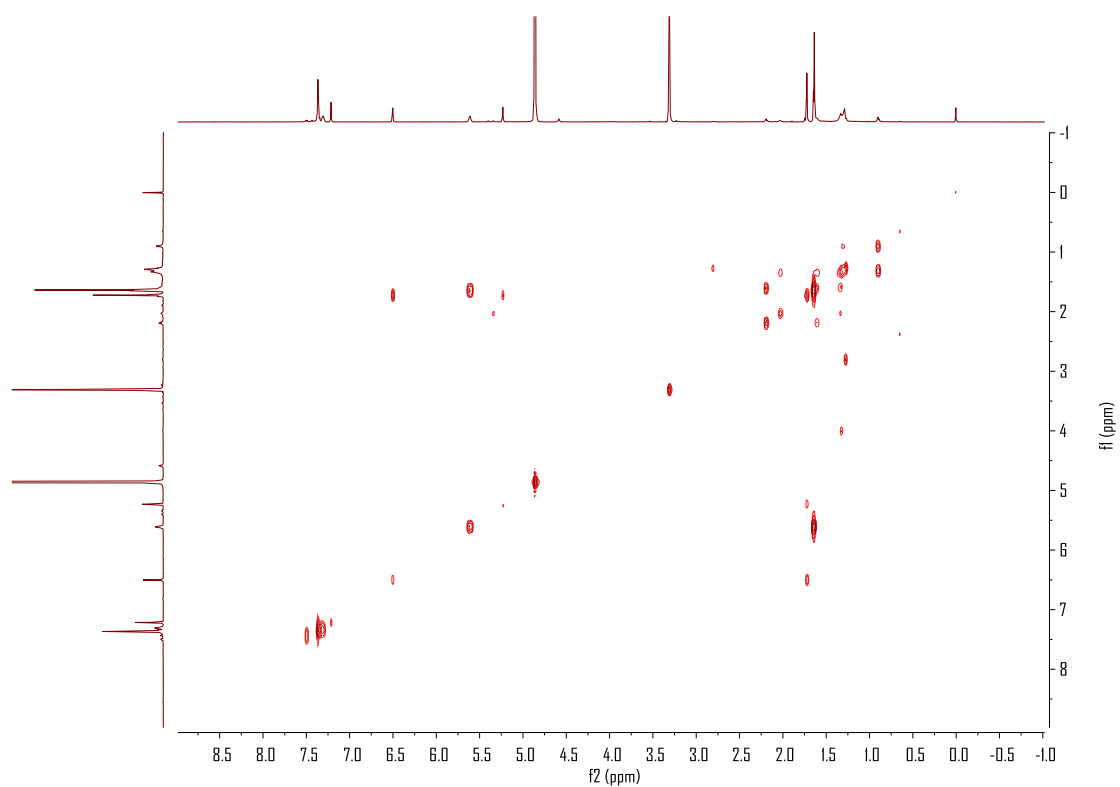

Figure S45.  $^1\text{H}$ - $^1\text{H}$  COSY spectrum of **4a** in  $\text{CD}_3\text{OD}$

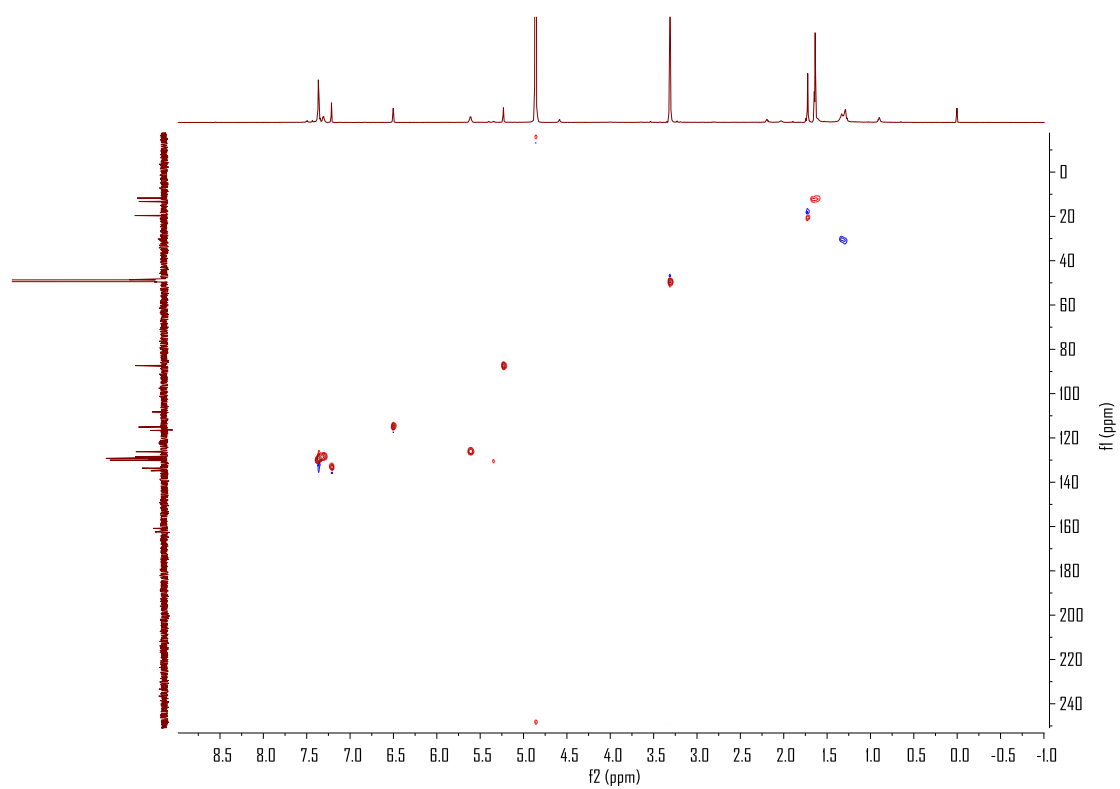

Figure S46. HSQC spectrum of **4a** in  $\text{CD}_3\text{OD}$

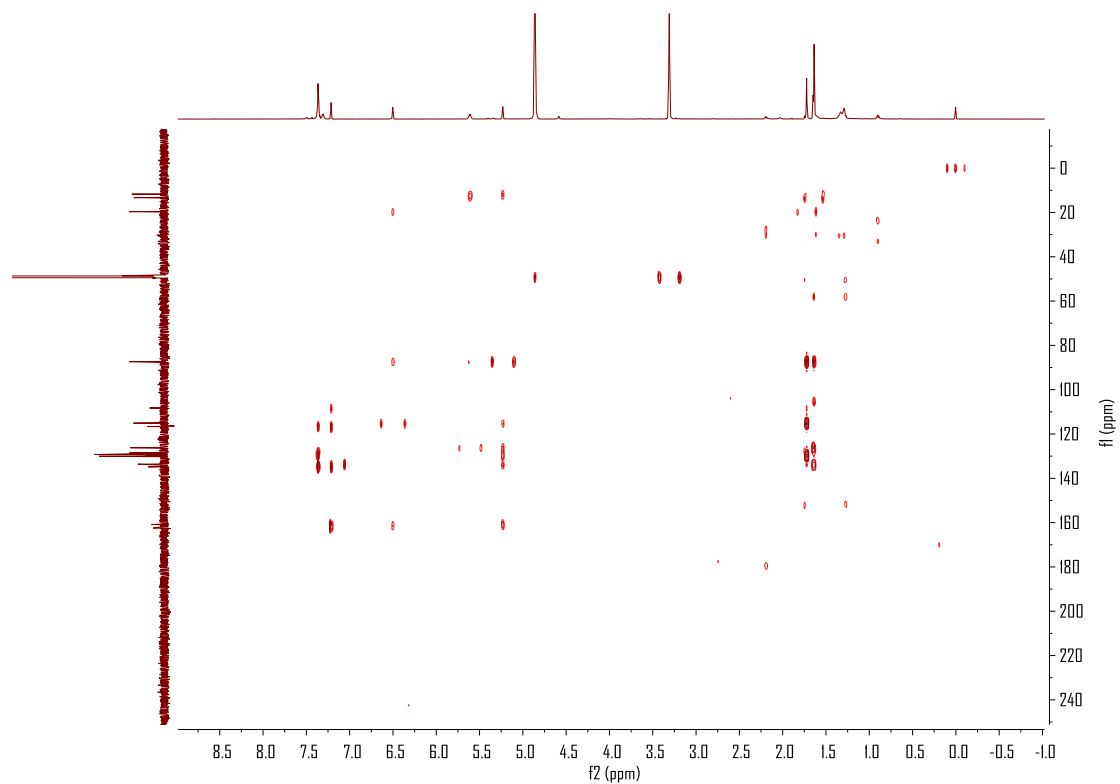

Figure S47. HMBC spectrum of **4a** in CD<sub>3</sub>OD

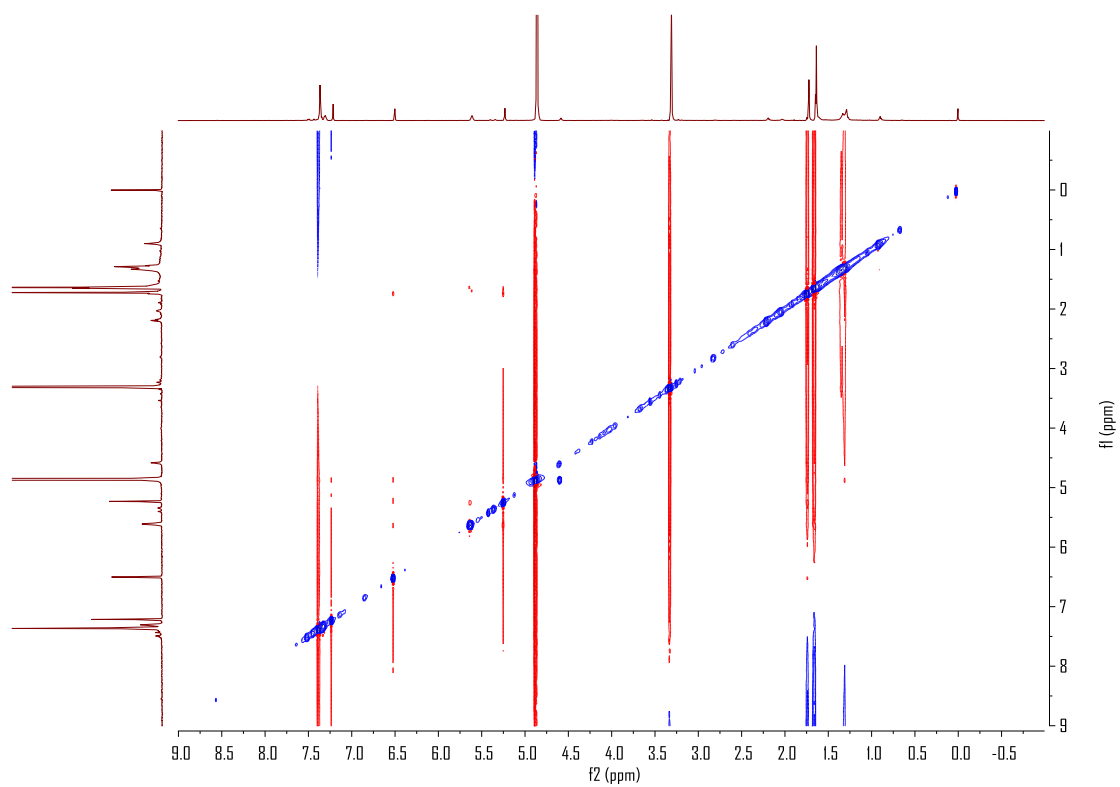

Figure S48. NOESY spectrum of **4a** in CD<sub>3</sub>OD



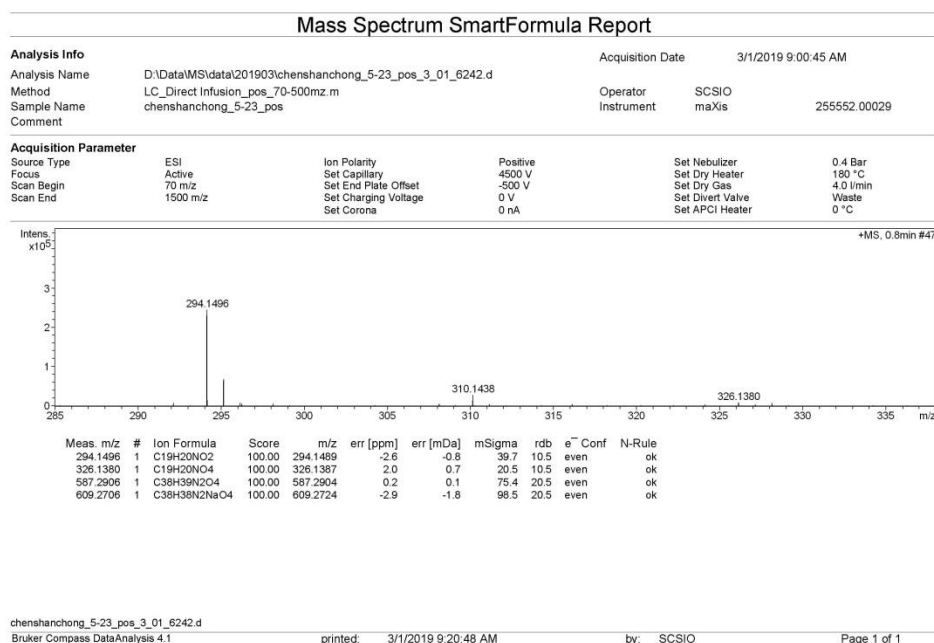

Figure S49. HRESIMS spectrum of **4a**

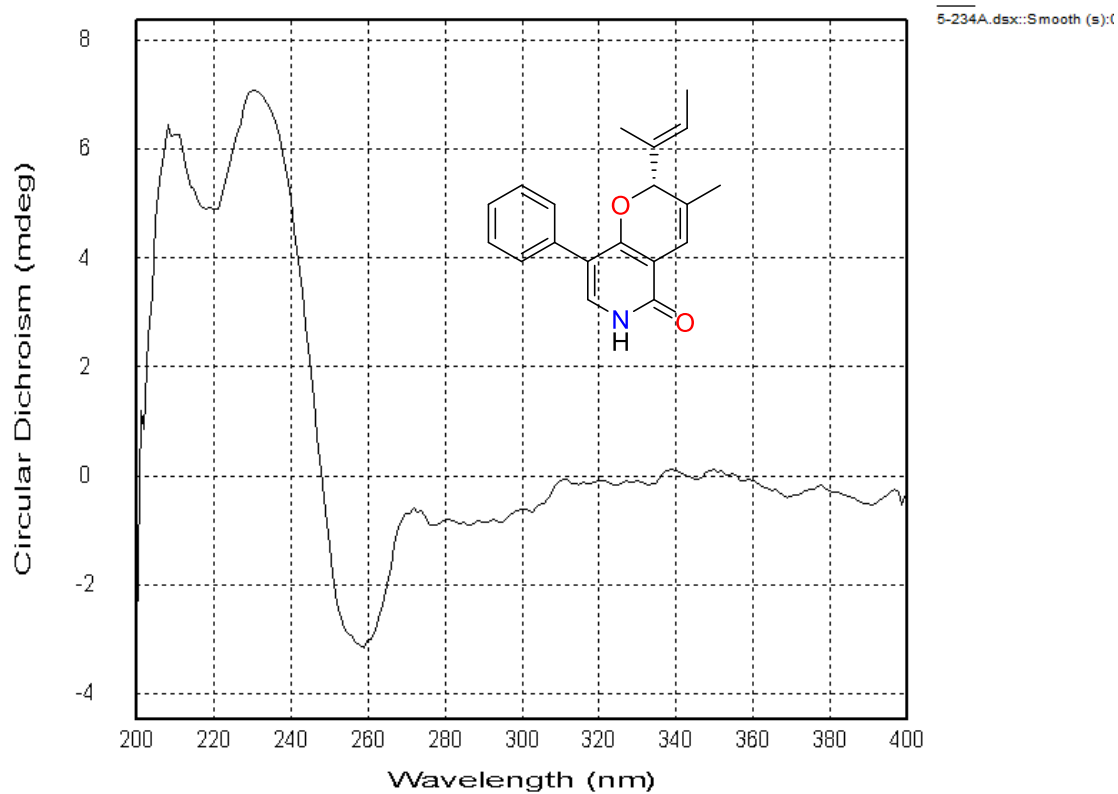

Figure S50. CD spectrum of **4a**

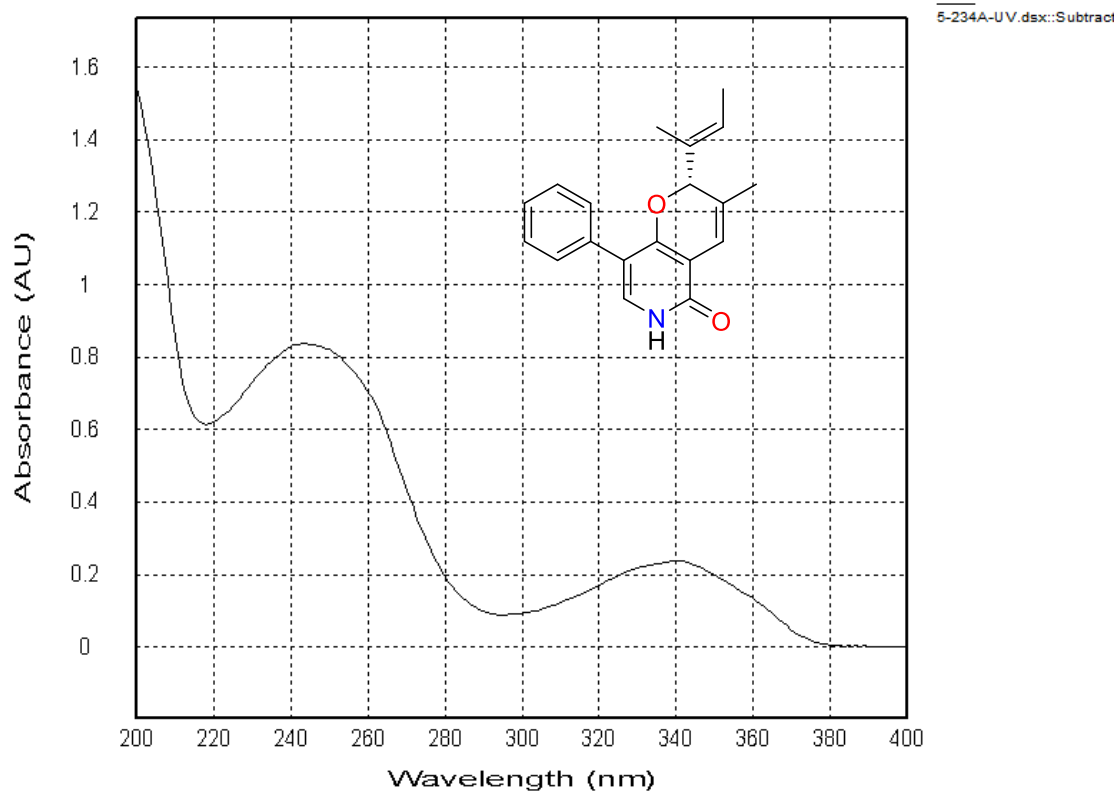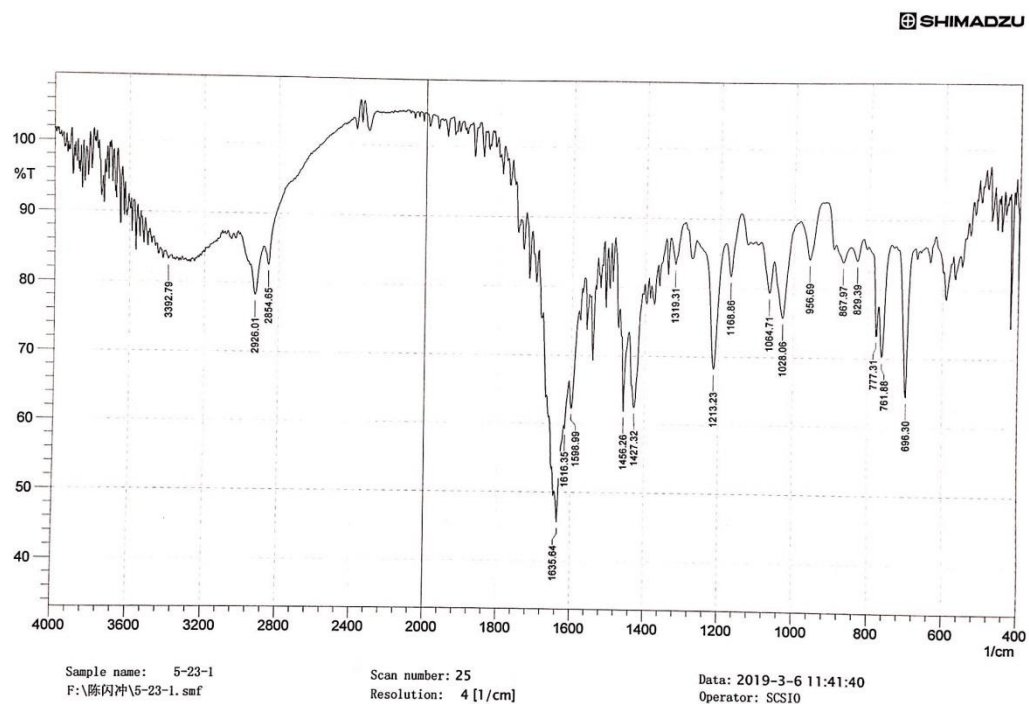

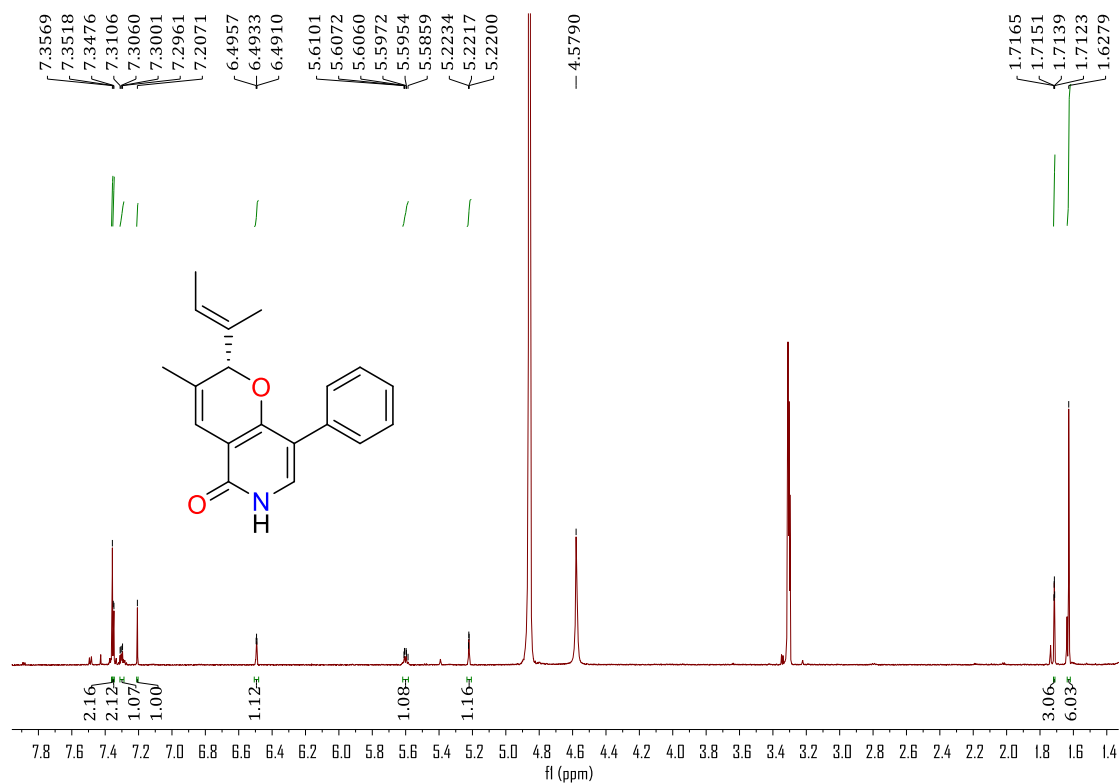

Figure S53. <sup>1</sup>H NMR spectrum (600 MHz, CD<sub>3</sub>OD) of **4b**

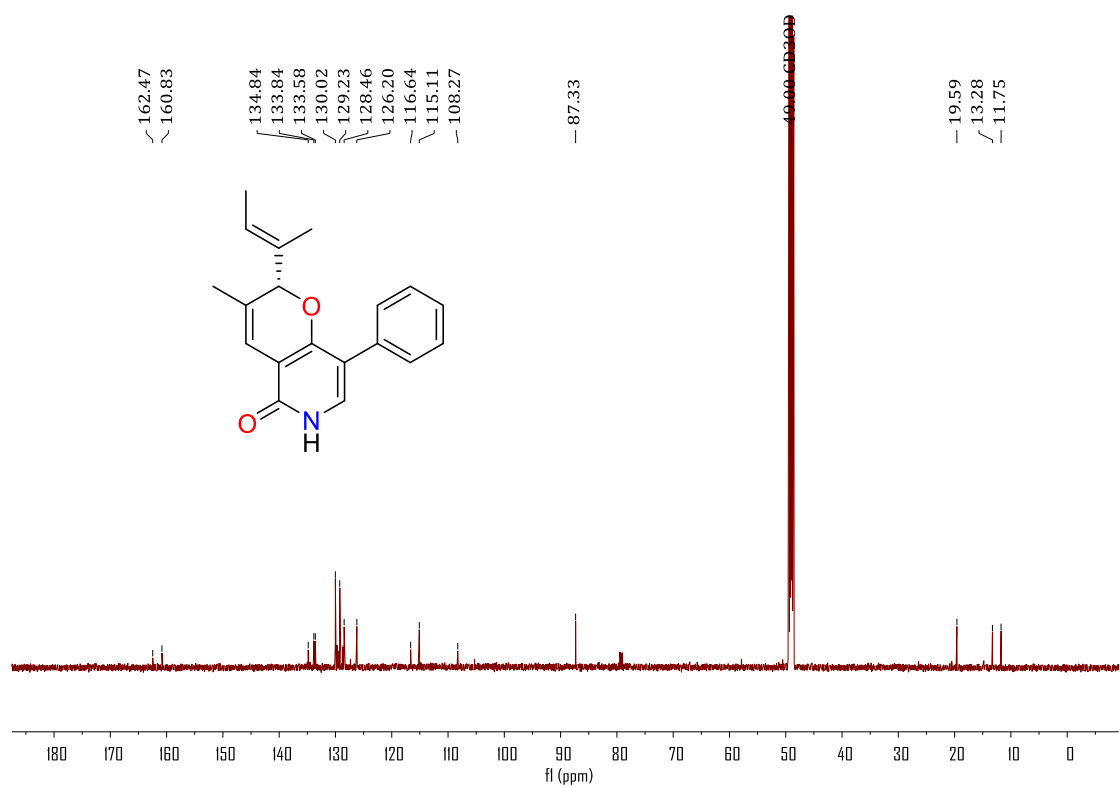

Figure S54. <sup>13</sup>C NMR spectrum (150 MHz, CD<sub>3</sub>OD) of **4b**

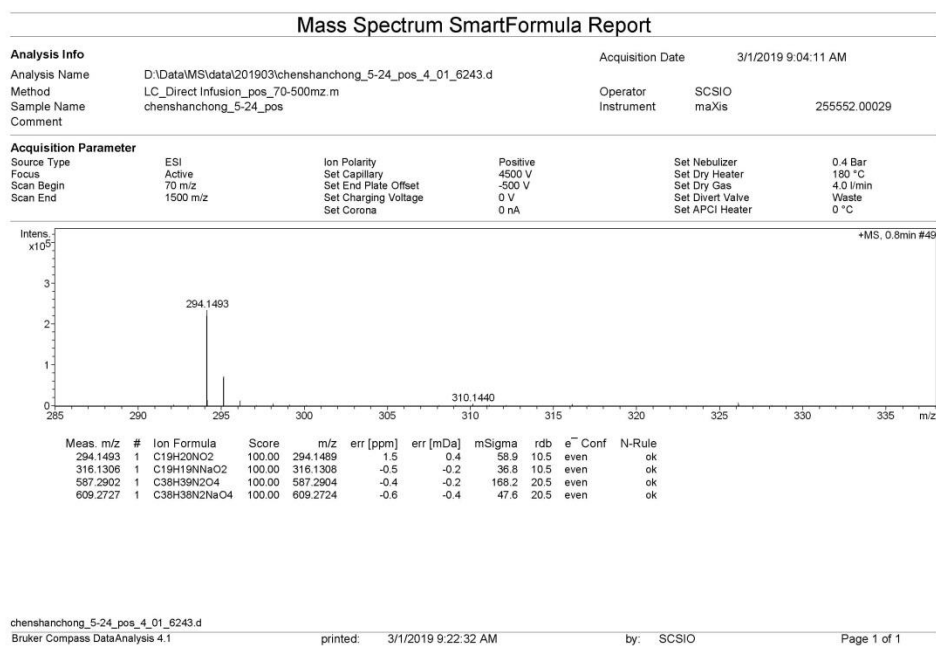

Figure S55. HRESIMS spectrum of **4b**

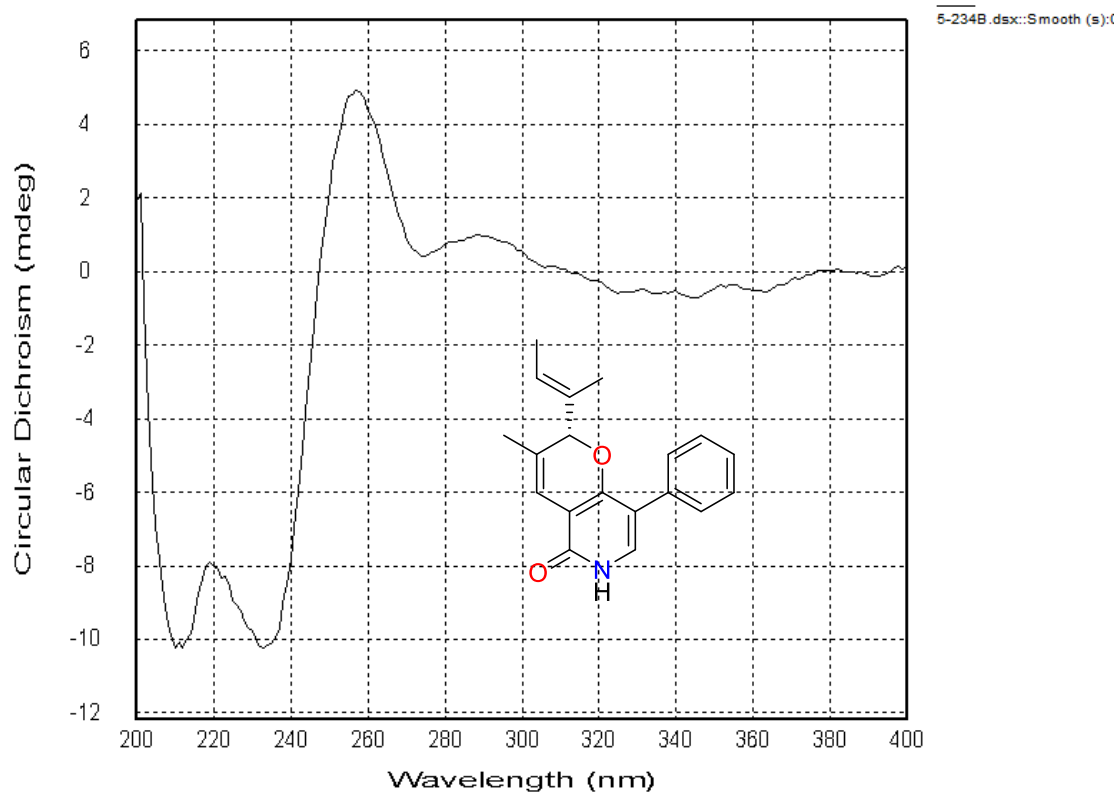

Figure S56. CD spectrum of **4b**

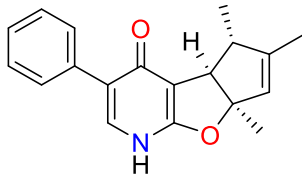

Figure S57.  $^1\text{H}$  NMR spectrum (600 MHz,  $\text{CD}_3\text{OD}$ ) of **5a**

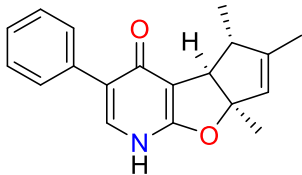

Figure S58.  $^{13}\text{C}$  NMR spectrum (150 MHz,  $\text{CD}_3\text{OD}$ ) of **5a**

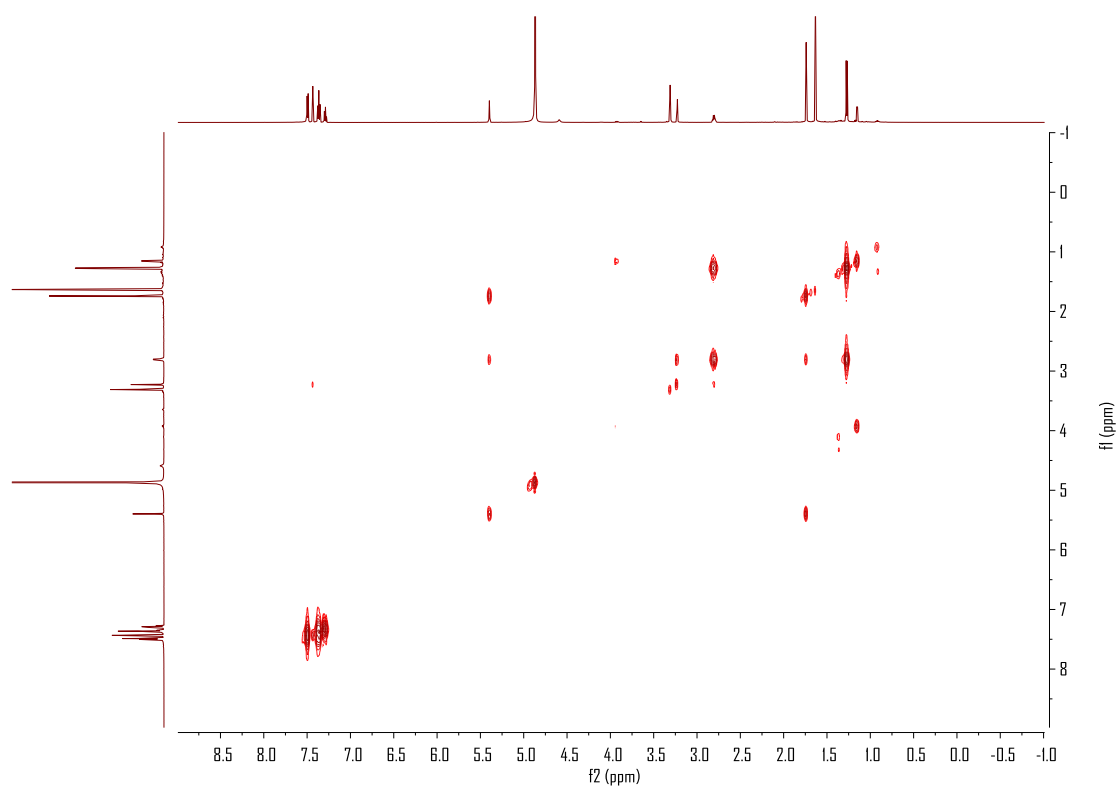

Figure S59.  $^1\text{H}$ - $^1\text{H}$  COSY spectrum of **5a** in  $\text{CD}_3\text{OD}$

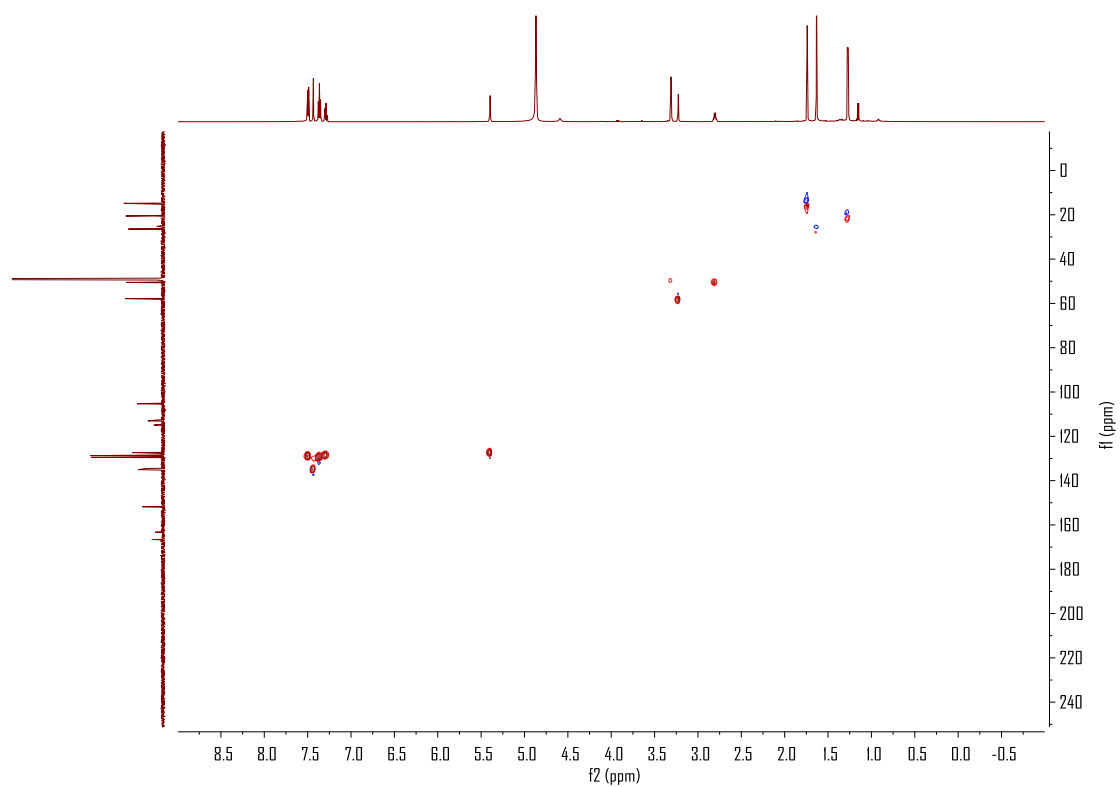

Figure S60. HSQC spectrum of **5a** in  $\text{CD}_3\text{OD}$

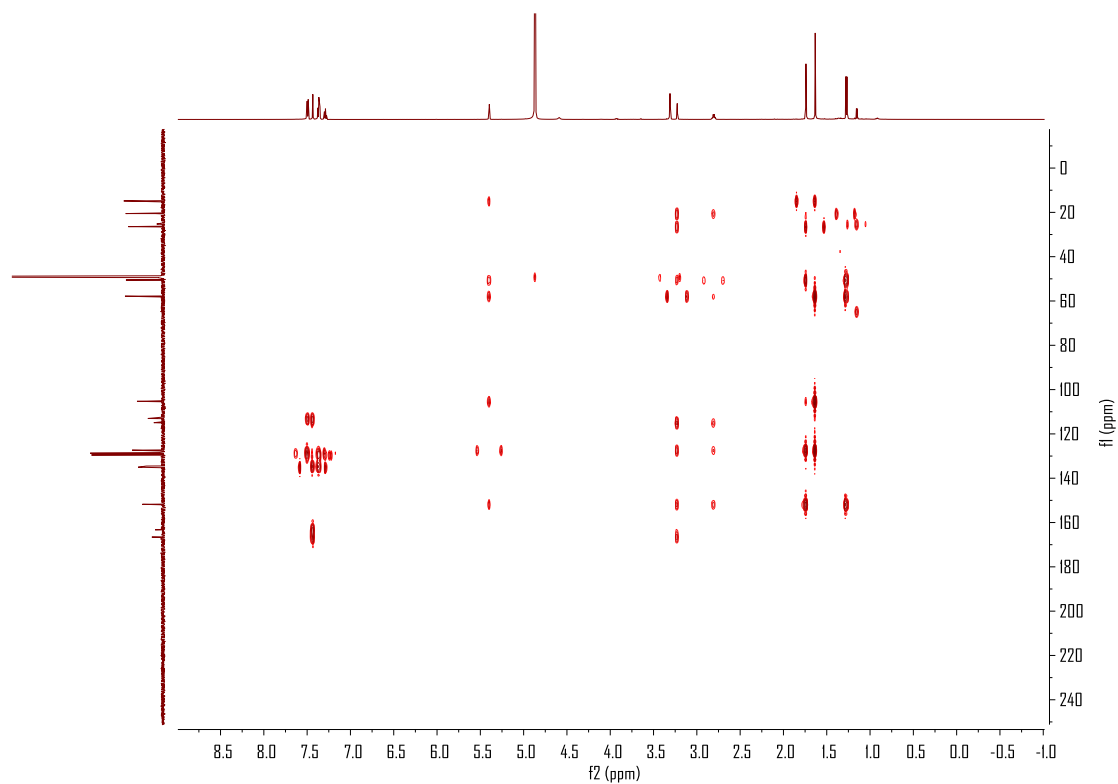

Figure S61. HMBC spectrum of **5a** in CD<sub>3</sub>OD

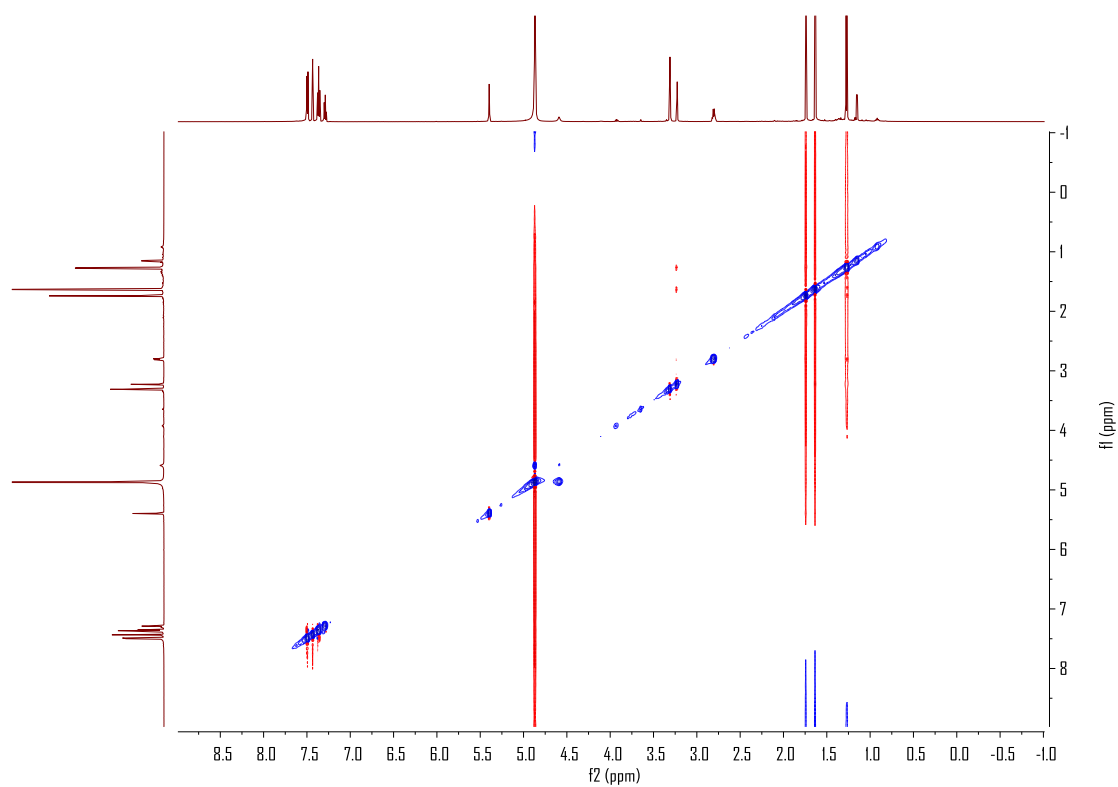

Figure S62. NOESY spectrum of **5a** in CD<sub>3</sub>OD

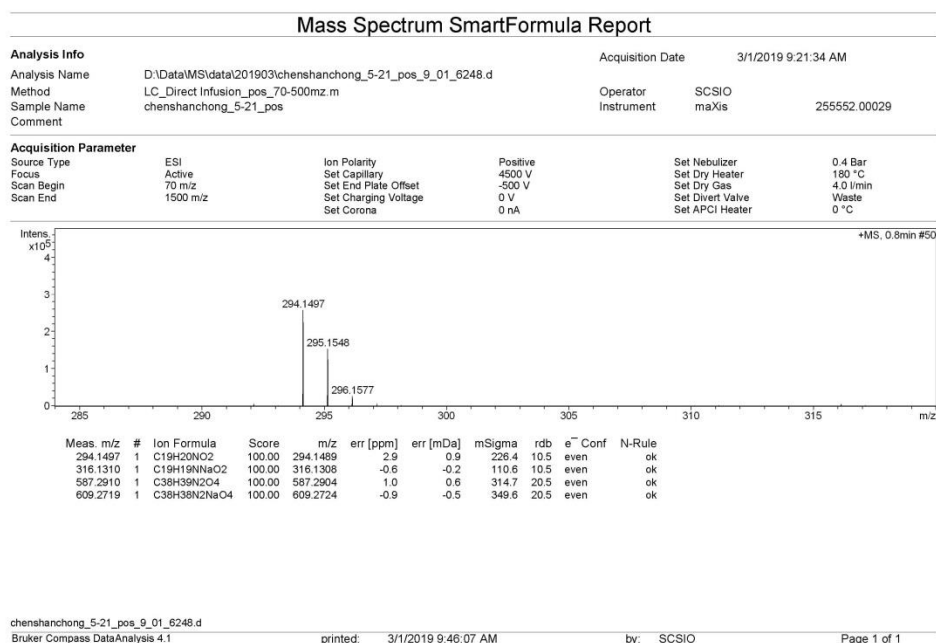

Figure S63. HRESIMS spectrum of **5a**

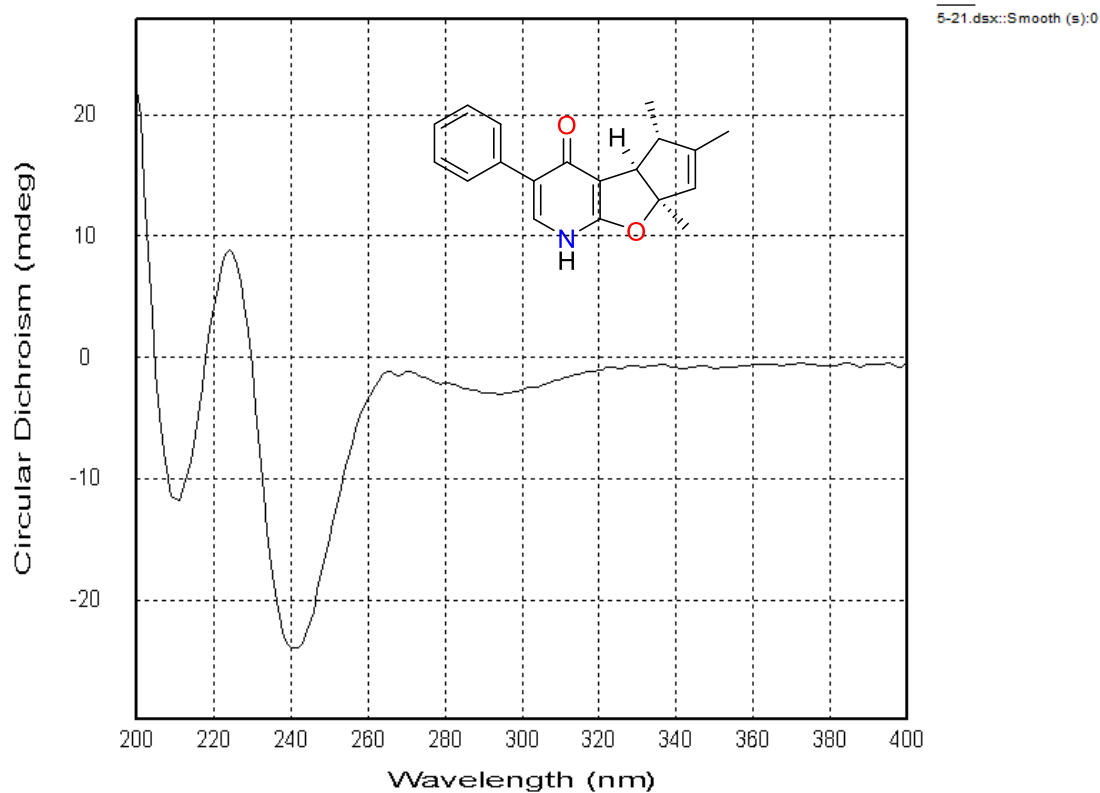

Figure S64. CD spectrum of **5a**



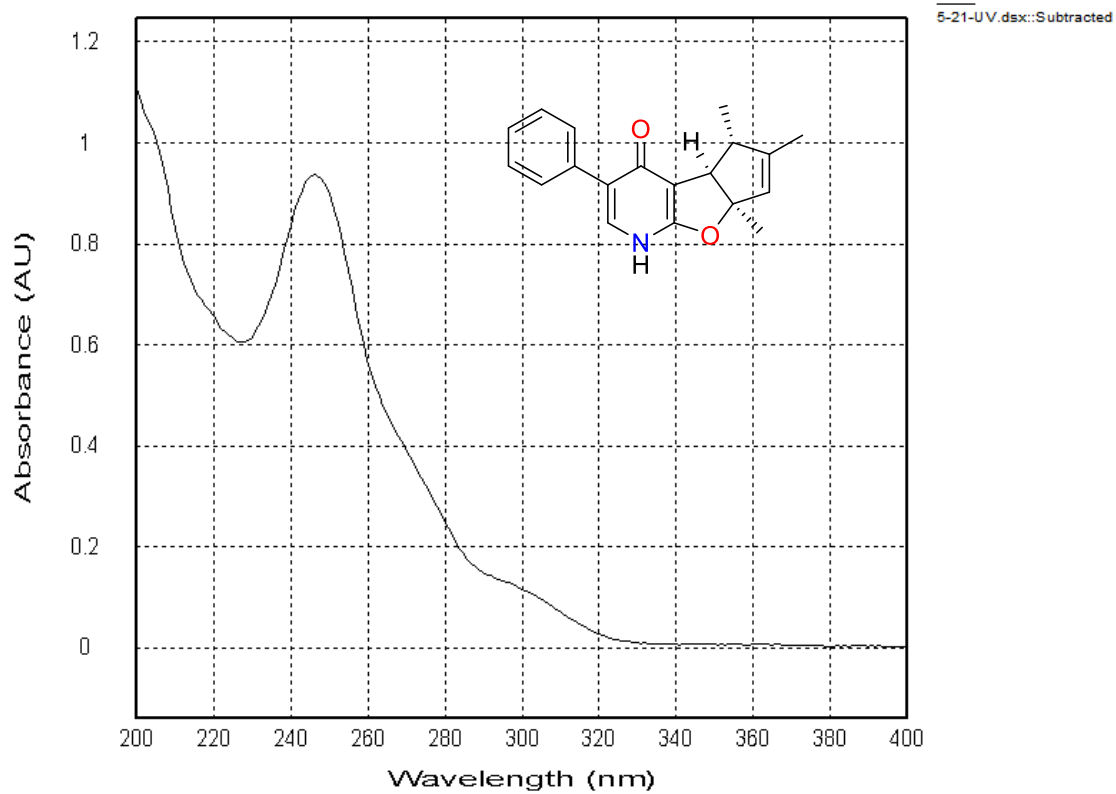

Figure S65. UV spectrum of **5a**

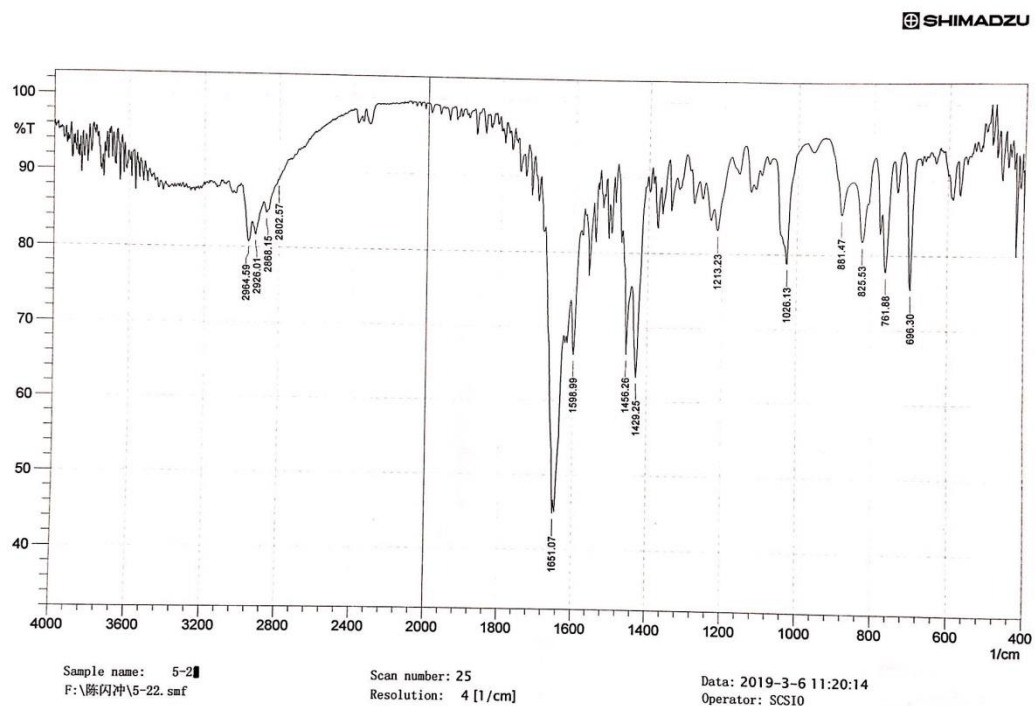

Figure S66. IR spectrum of **5a**

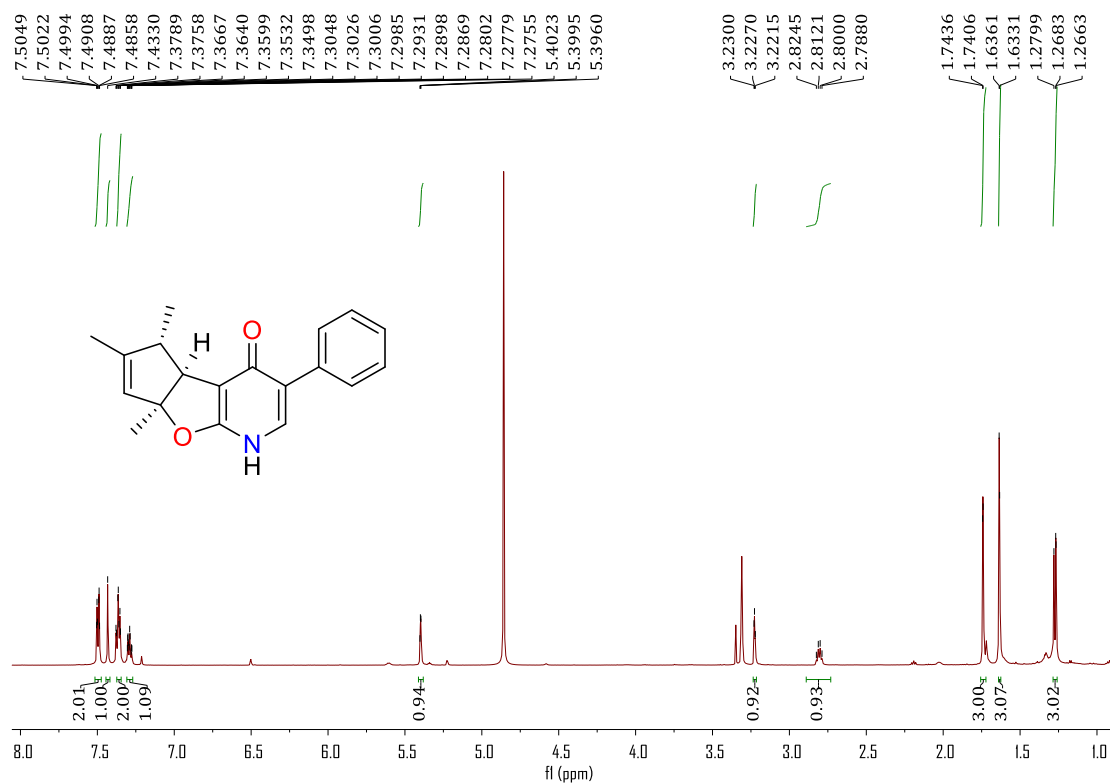

Figure S67. <sup>1</sup>H NMR spectrum (600 MHz, CD<sub>3</sub>OD) of **5b**

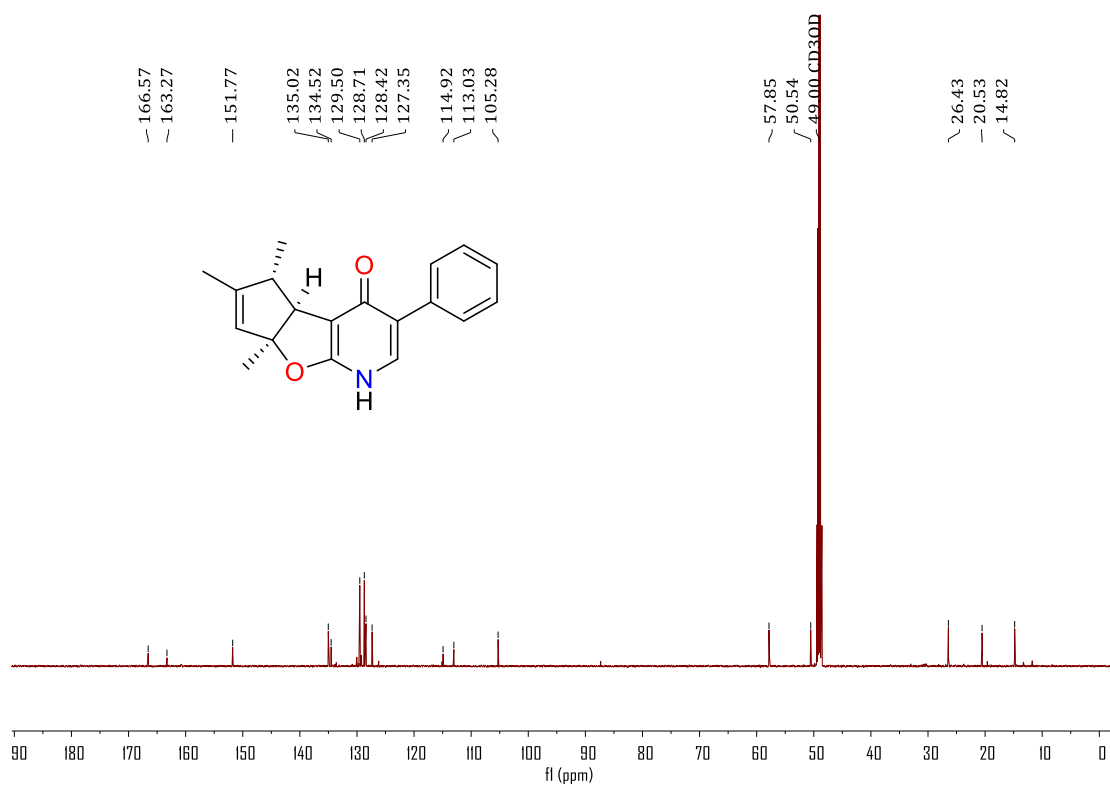

Figure S68. <sup>13</sup>C NMR spectrum (150 MHz, CD<sub>3</sub>OD) of **5b**

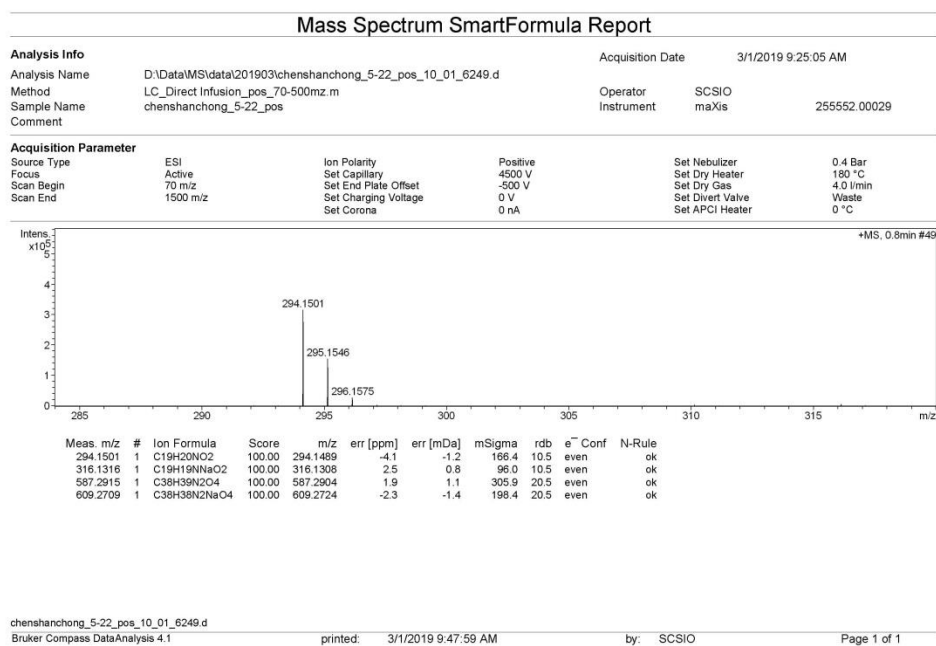

Figure S69. HRESIMS spectrum of **5b**

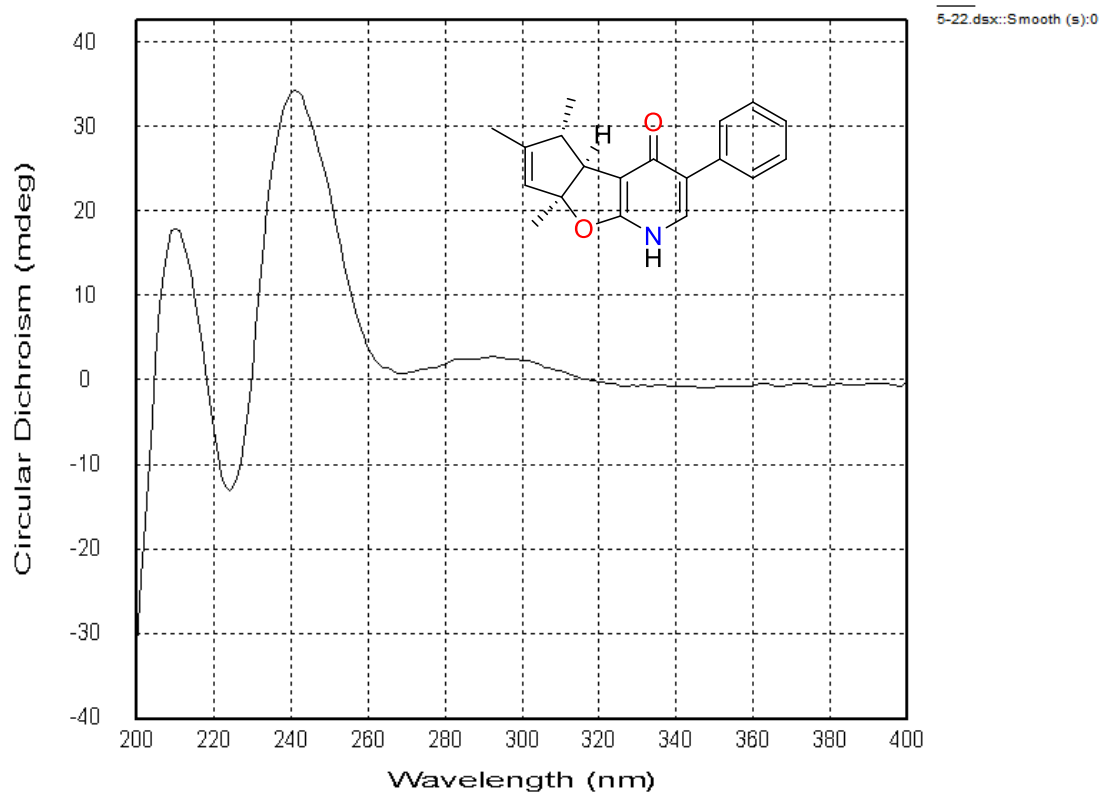

Figure S70. CD spectrum of **5b**

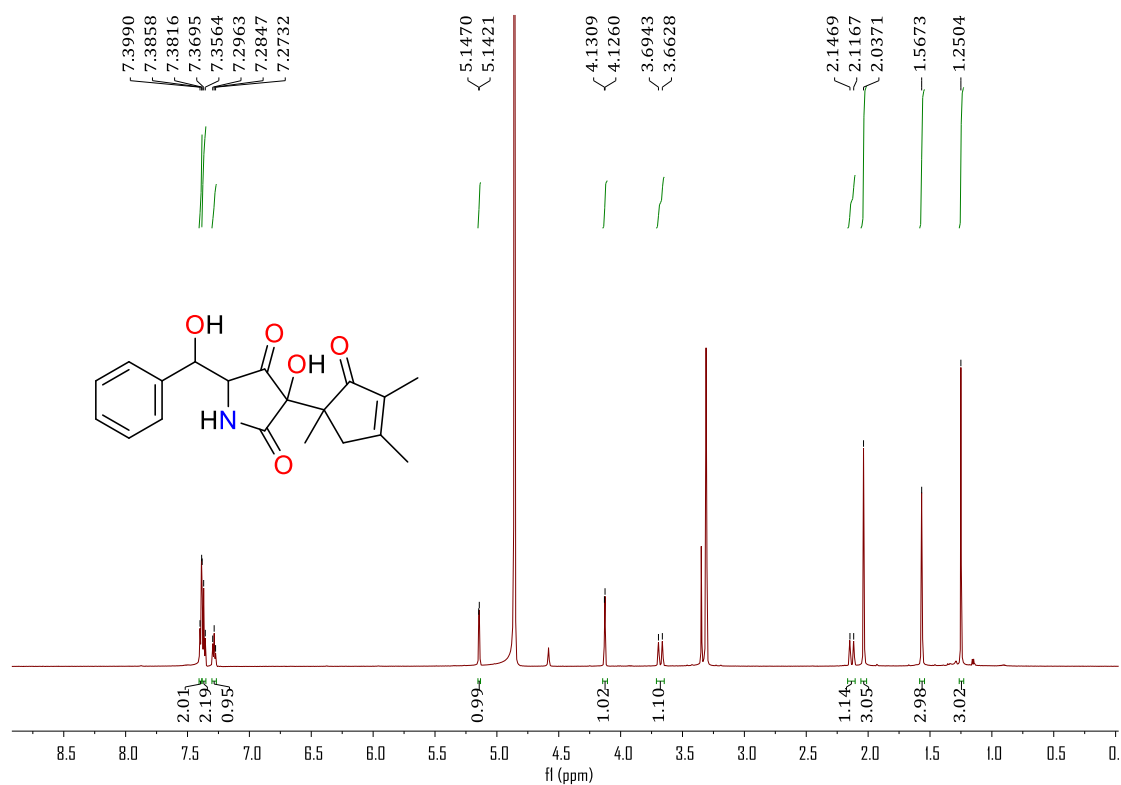

Figure S71. <sup>1</sup>H NMR spectrum (600 MHz, CD<sub>3</sub>OD) of **6**

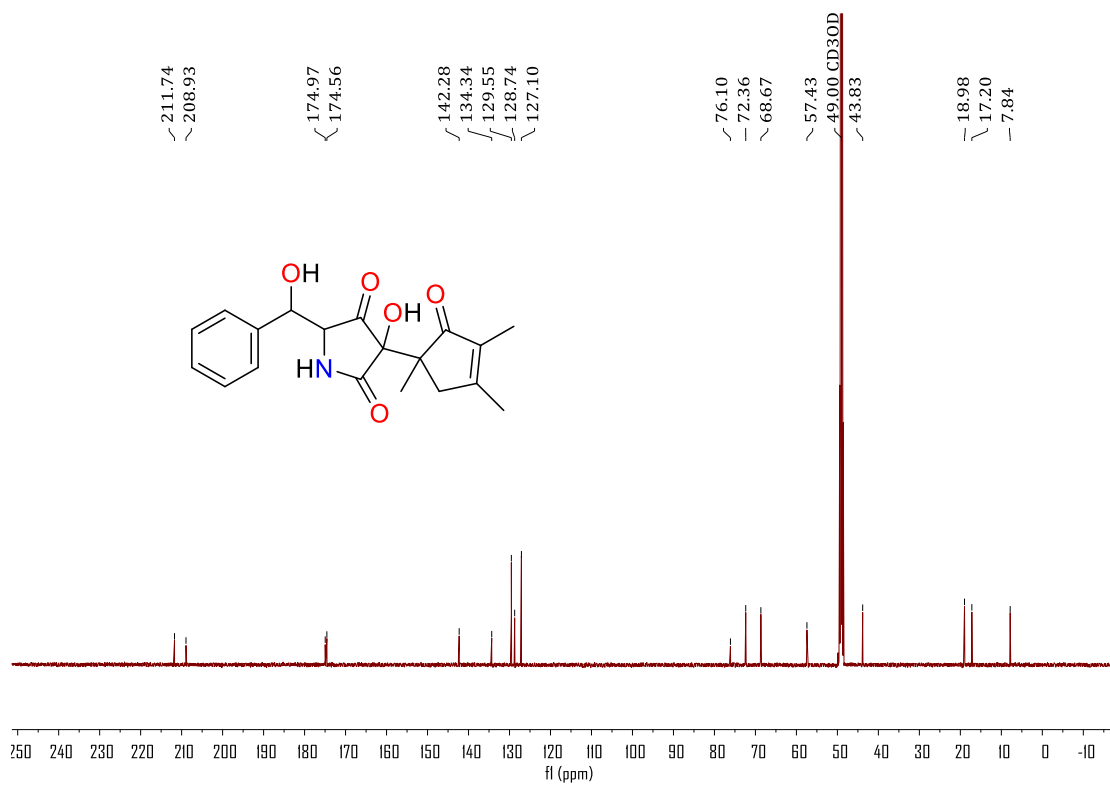

Figure S72. <sup>13</sup>C NMR spectrum (150 MHz, CD<sub>3</sub>OD) of **6**

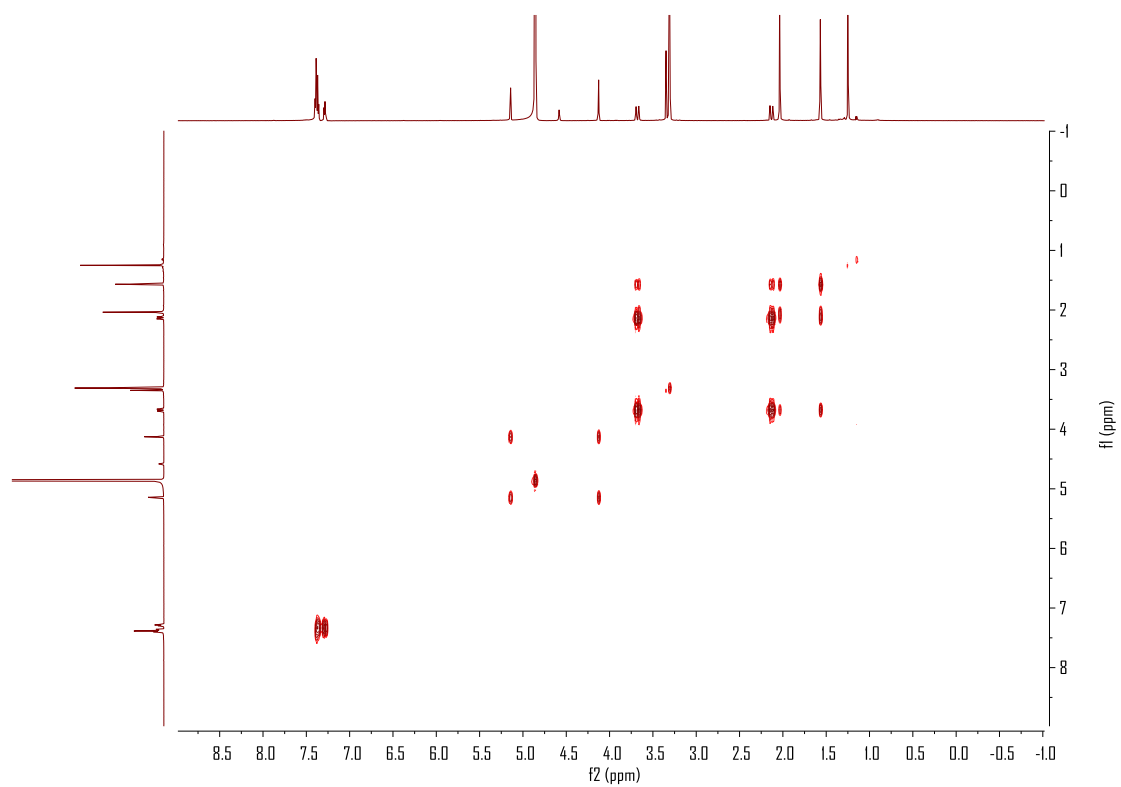

Figure S73.  $^1\text{H}$ - $^1\text{H}$  COSY spectrum of **6** in  $\text{CD}_3\text{OD}$

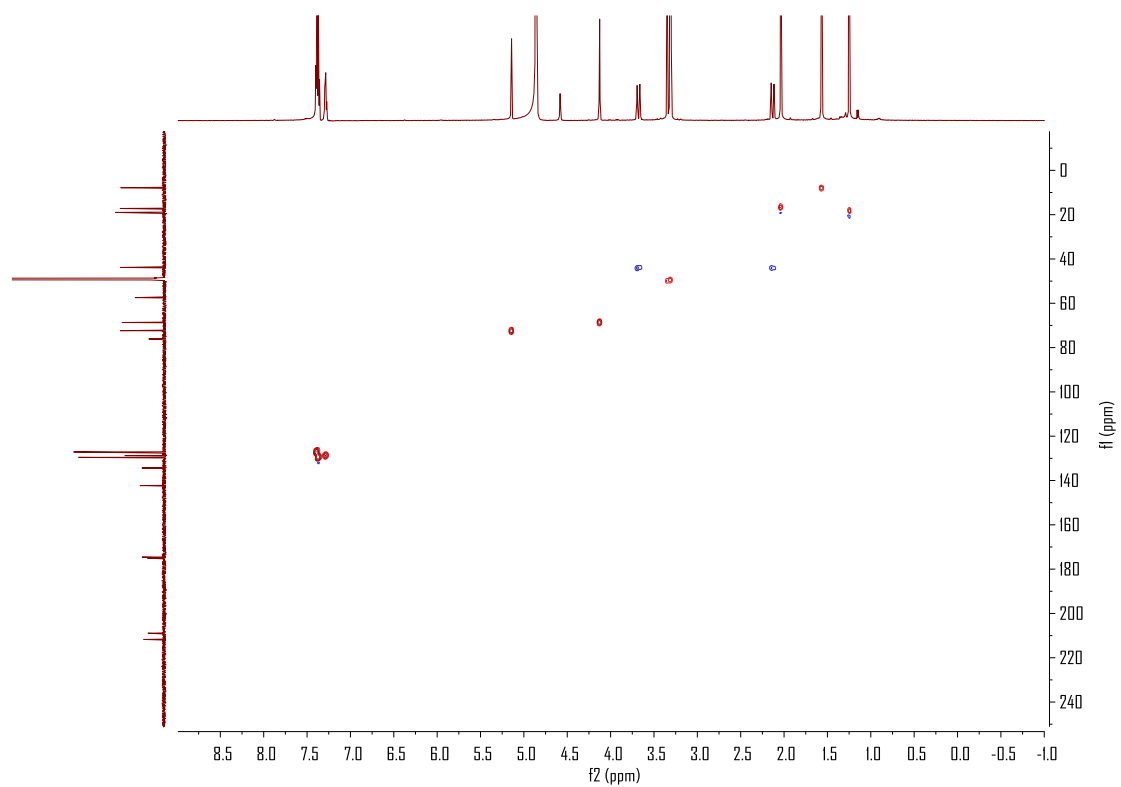

Figure S74. HSQC spectrum of **6** in  $\text{CD}_3\text{OD}$

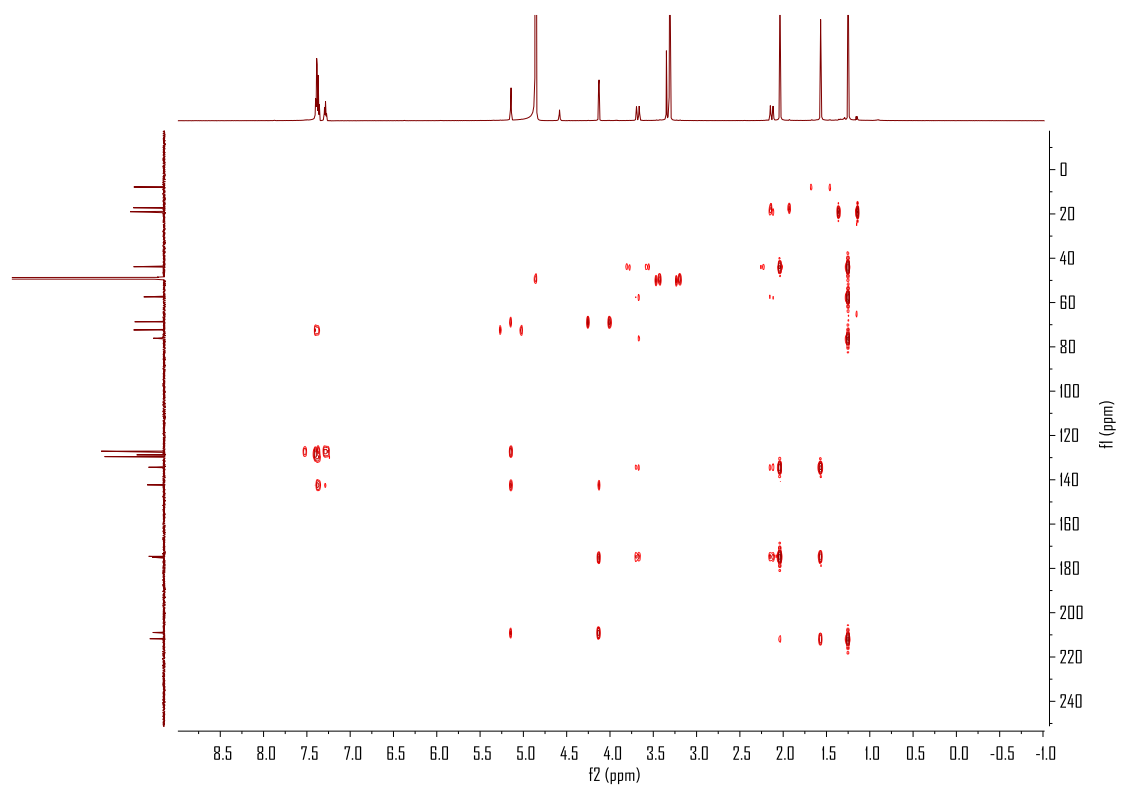

Figure S75. HMBC spectrum of **6** in CD<sub>3</sub>OD

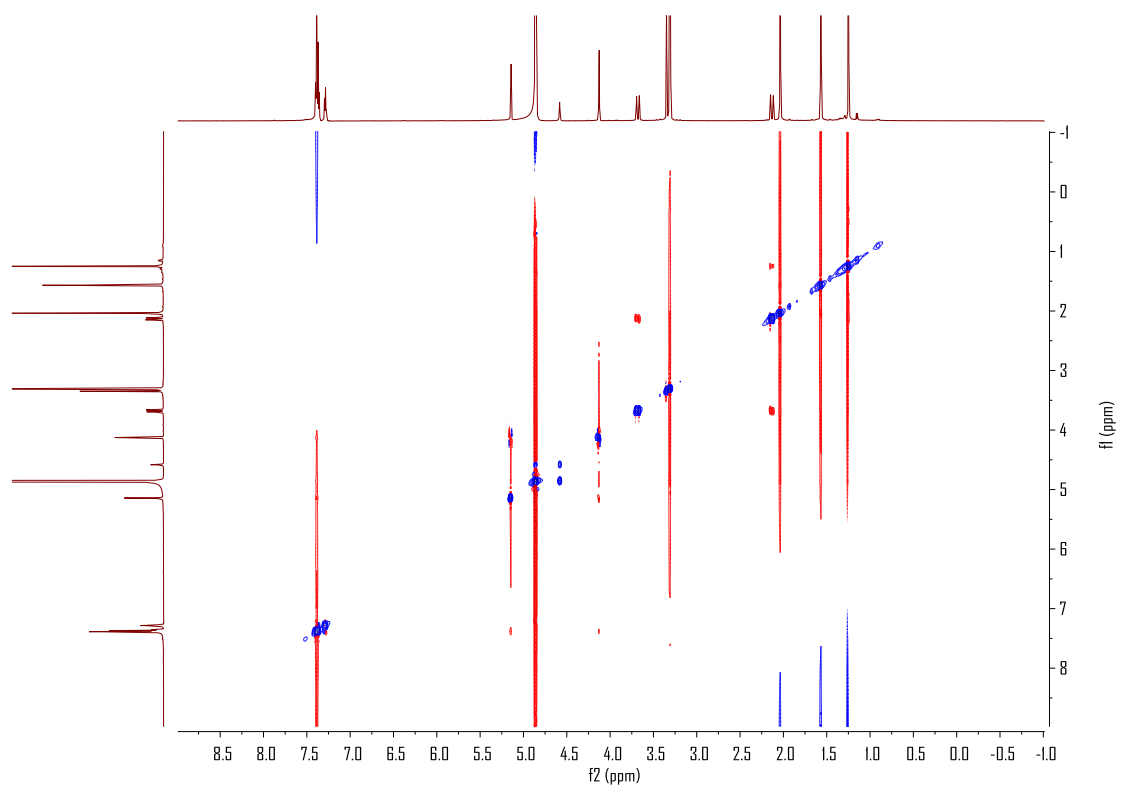

Figure S76. NOESY spectrum of **6** in CD<sub>3</sub>OD

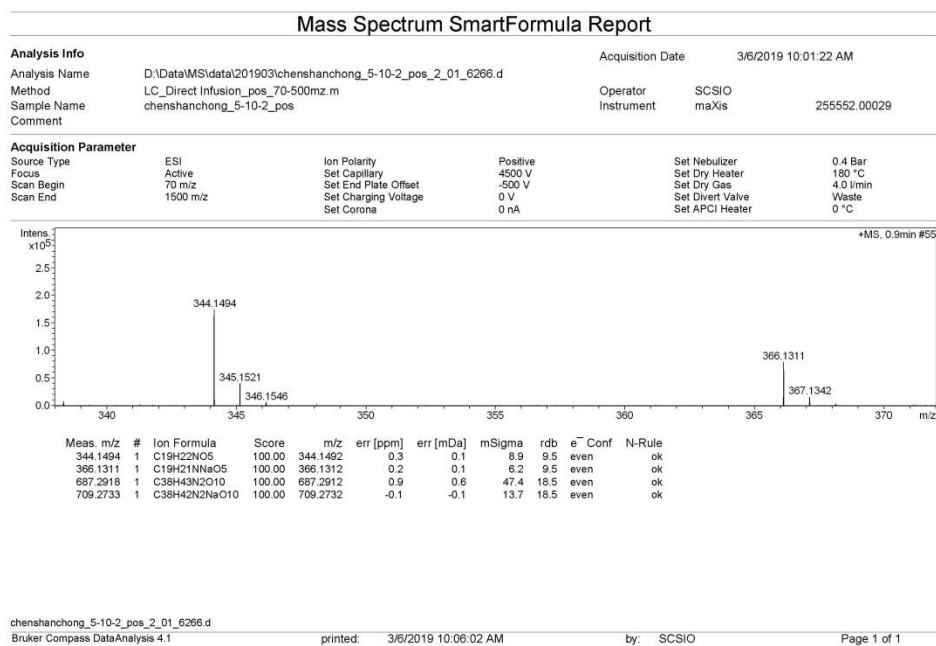

Figure S77. HRESIMS spectrum of **6**

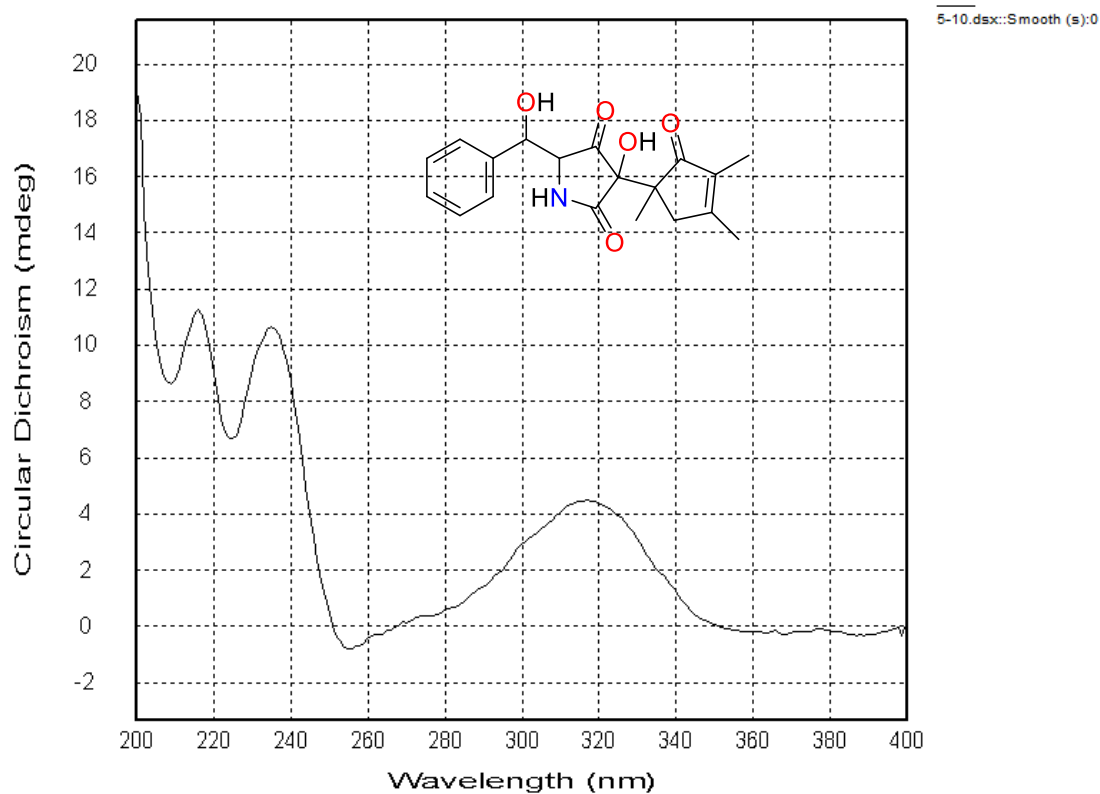

Figure S78. CD spectrum of **6**

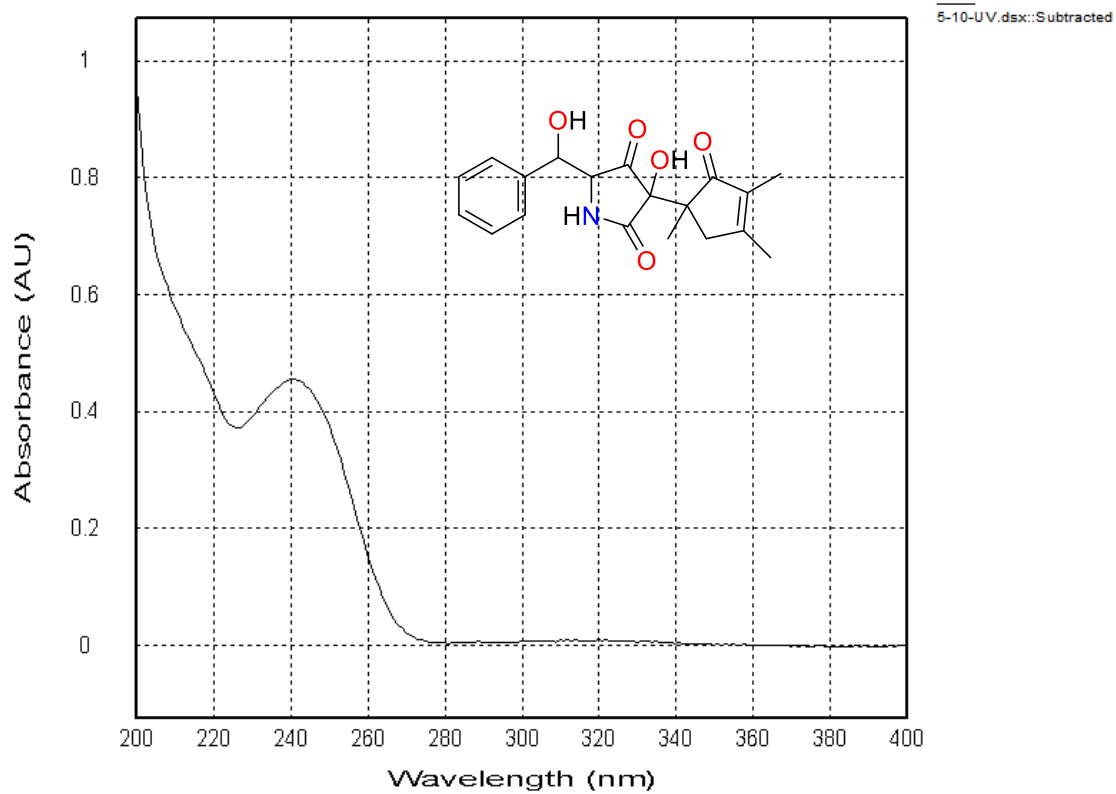

Figure S79. UV spectrum of **6**

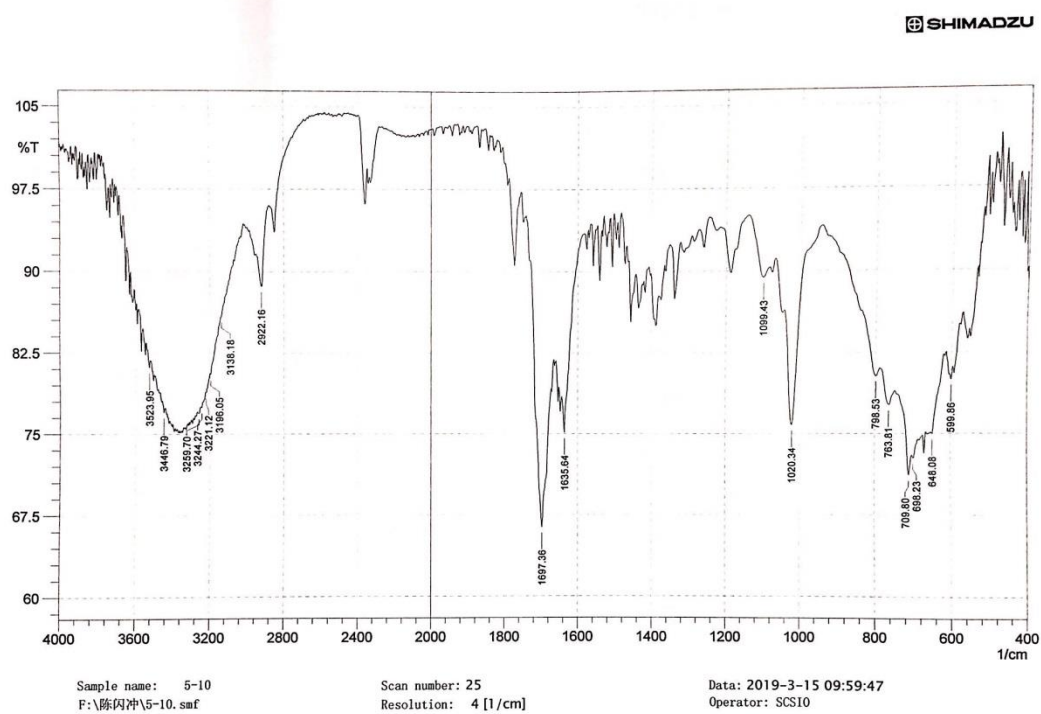

Figure S80. IR spectrum of **6**



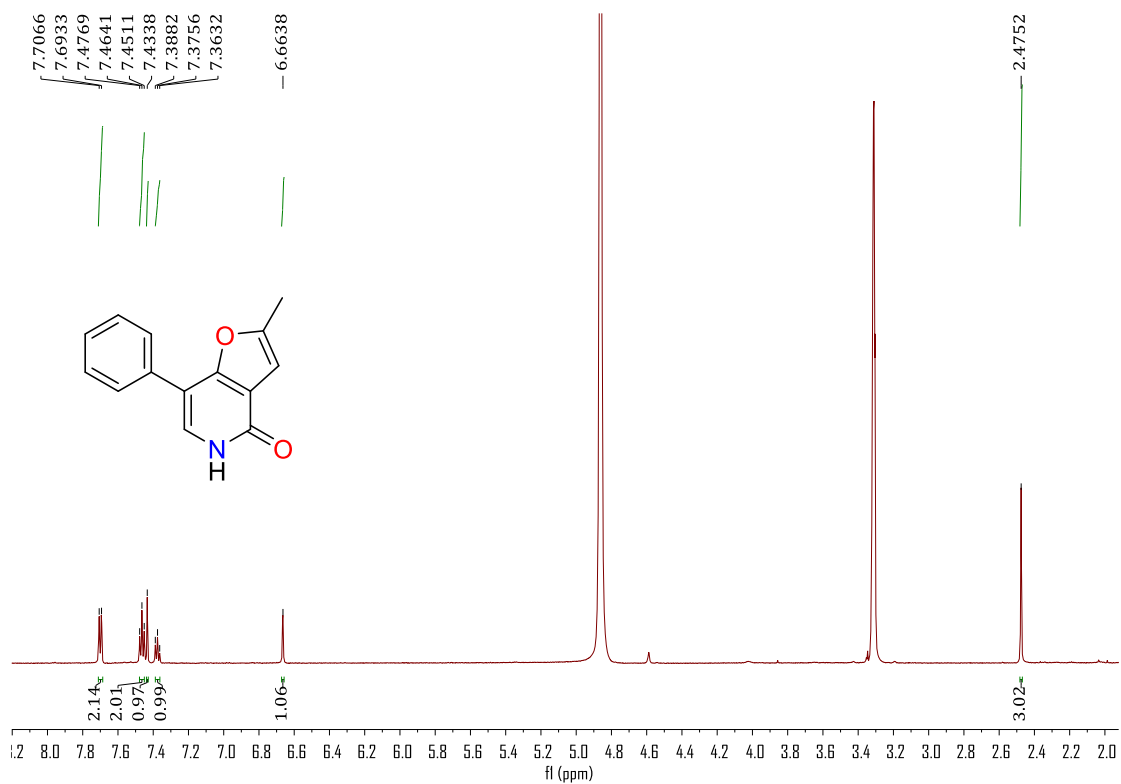

Figure S81. <sup>1</sup>H NMR spectrum (600 MHz, CD<sub>3</sub>OD) of **7**

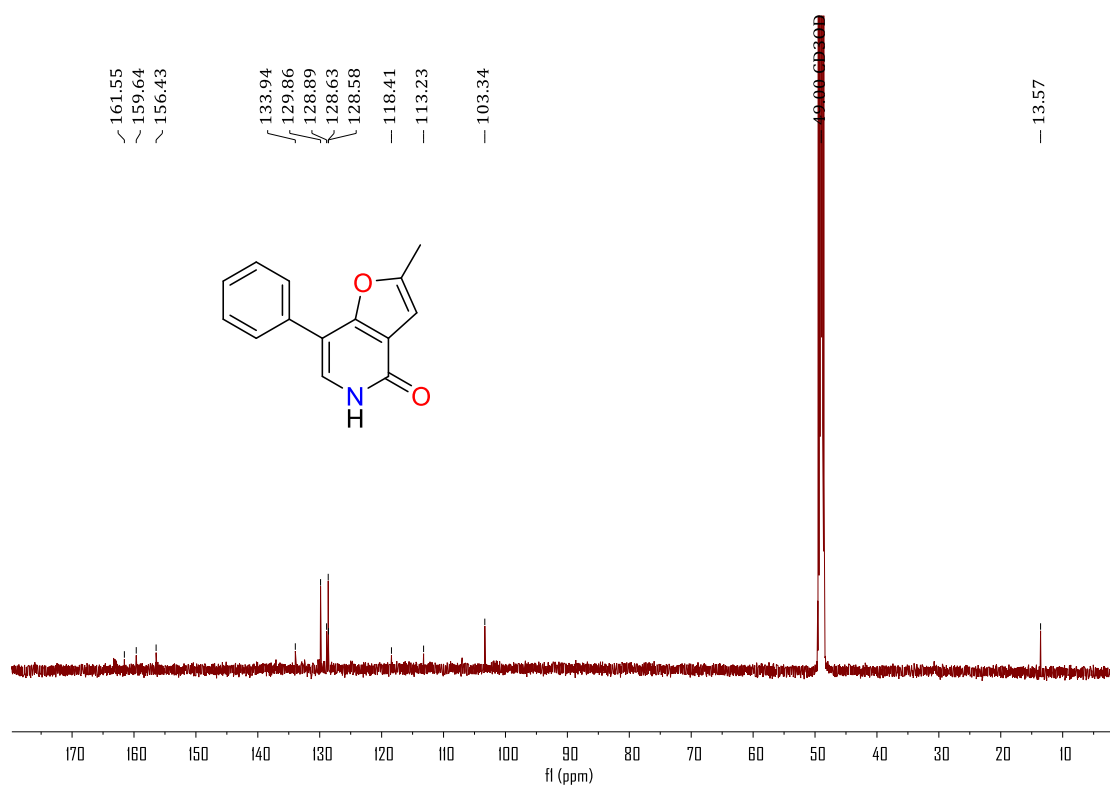

Figure S82. <sup>13</sup>C NMR spectrum (150 MHz, CD<sub>3</sub>OD) of **7**

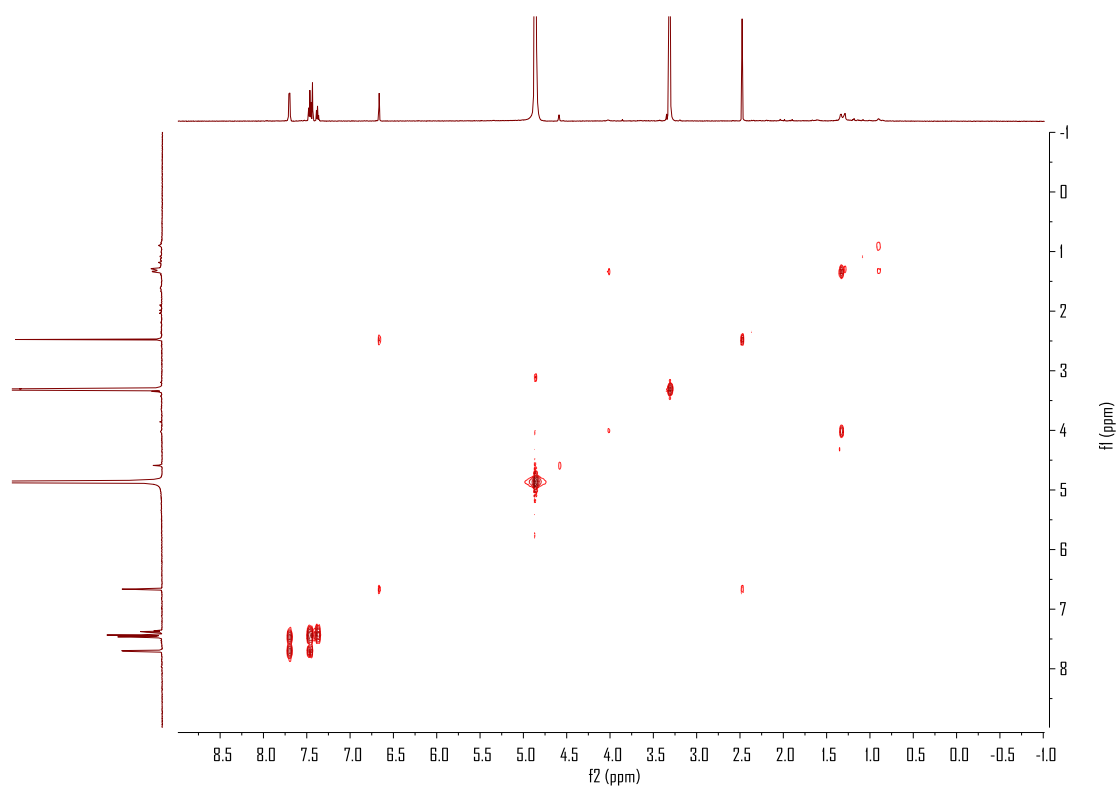

Figure S83.  $^1\text{H}$ - $^1\text{H}$  COSY spectrum of **7** in  $\text{CD}_3\text{OD}$

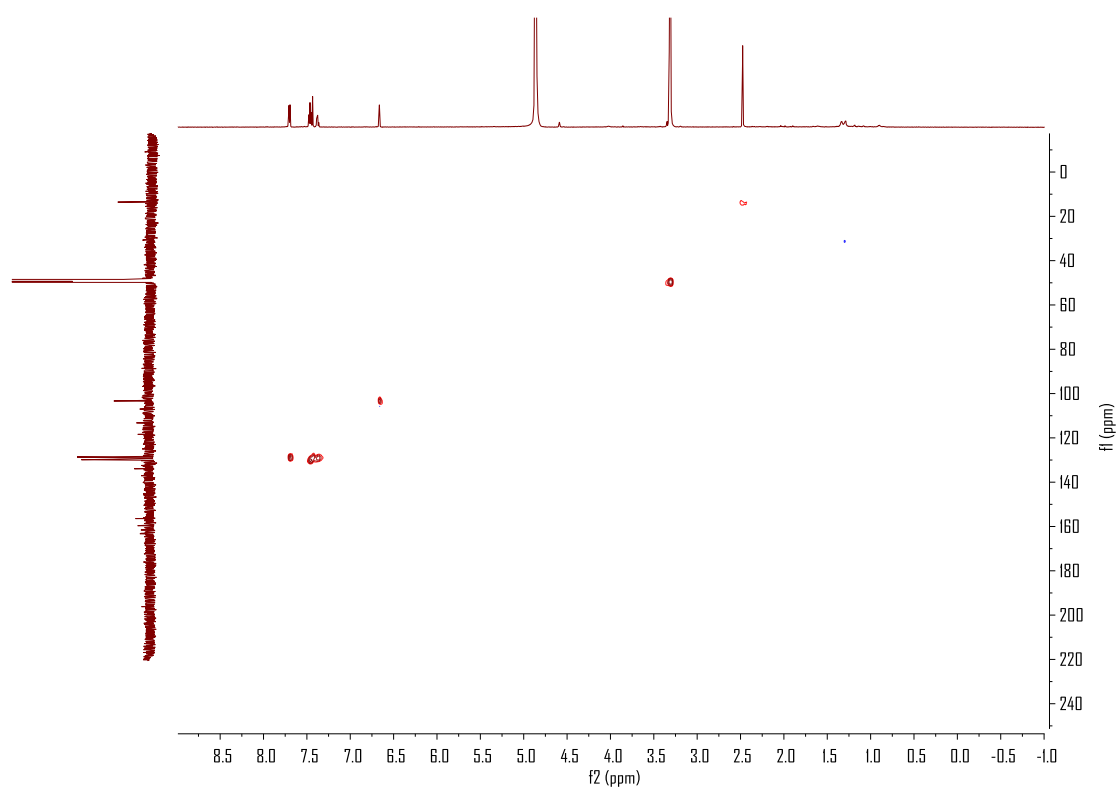

Figure S84. HSQC spectrum of **7** in  $\text{CD}_3\text{OD}$

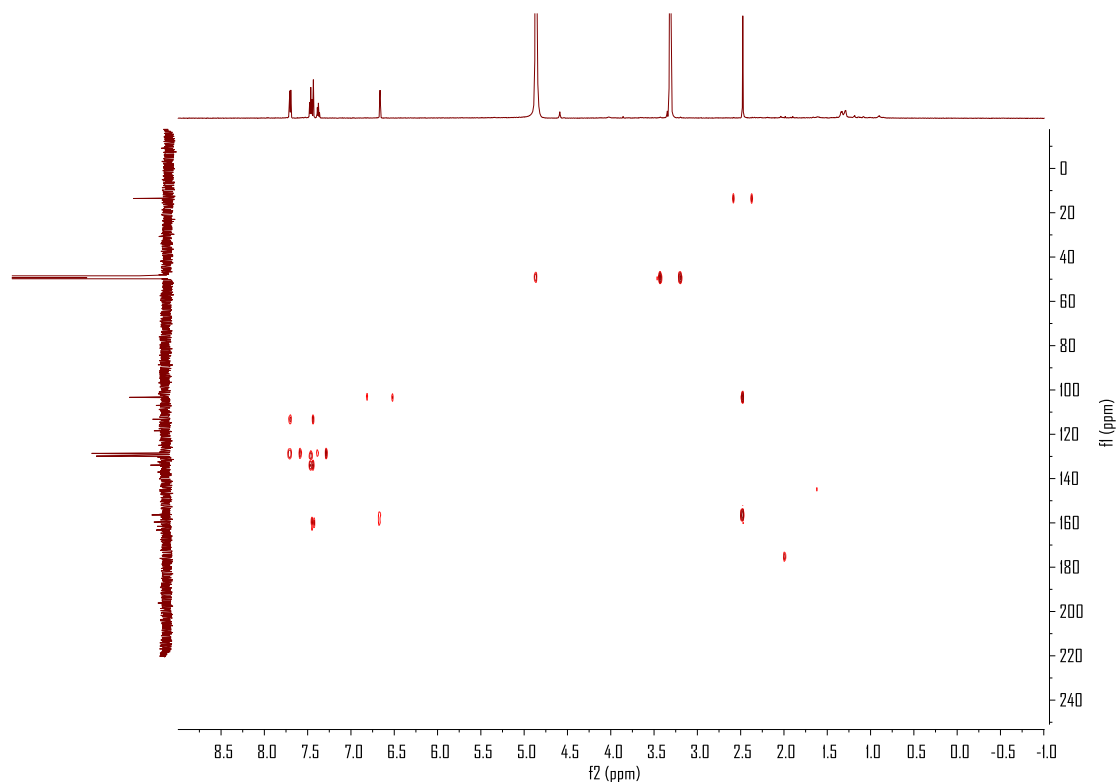

Figure S85. HMBC spectrum of **7** in CD<sub>3</sub>OD

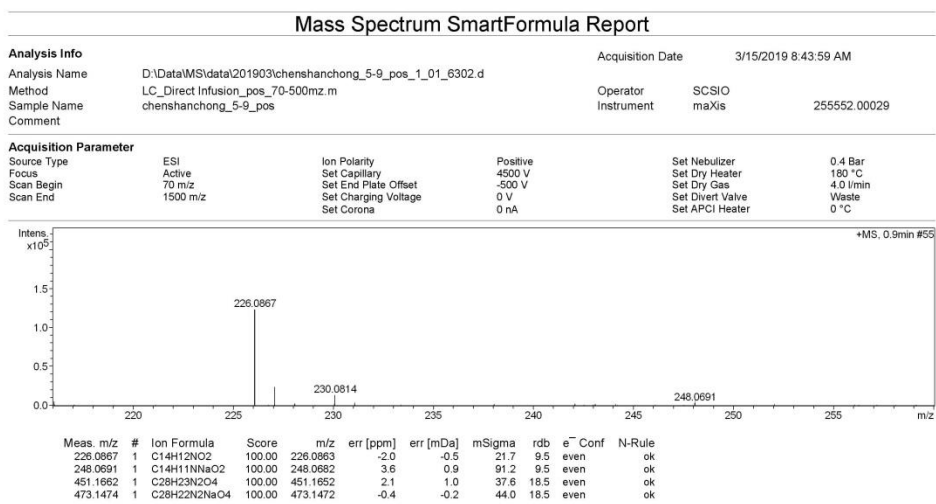

chenshanchong\_5-9\_pos\_1\_01\_6302.d  
Bruker Compass DataAnalysis 4.1

printed: 3/15/2019 8:49:25 AM

by: SCSIO

Page 1 of 1

Figure S86. HRESIMS spectrum of **7**

# 光谱峰值检测报告

2019-03-15 10:37:14

数据集: FS441 5-9 - RawData

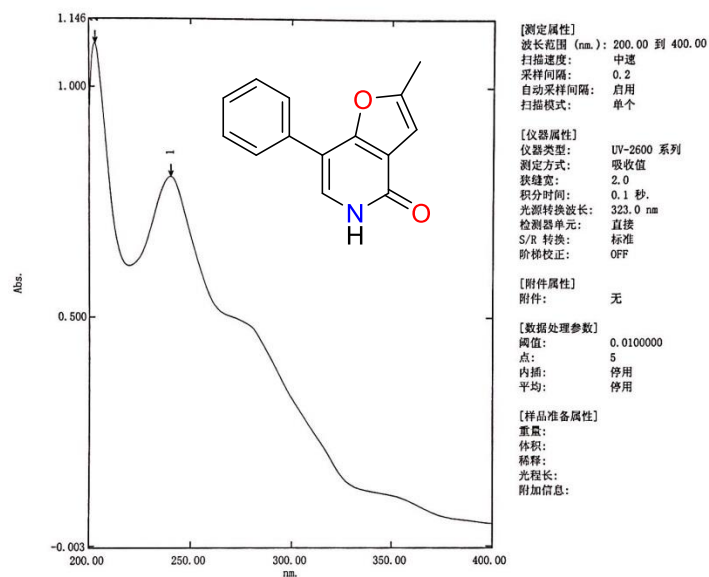

| No. | P/V | 波长 (nm) | 吸收值   | 描述 |
|-----|-----|---------|-------|----|
| 1   | ①   | 240.20  | 0.808 |    |
| 2   | ①   | 203.00  | 1.093 |    |

Figure S87. UV spectrum of 7

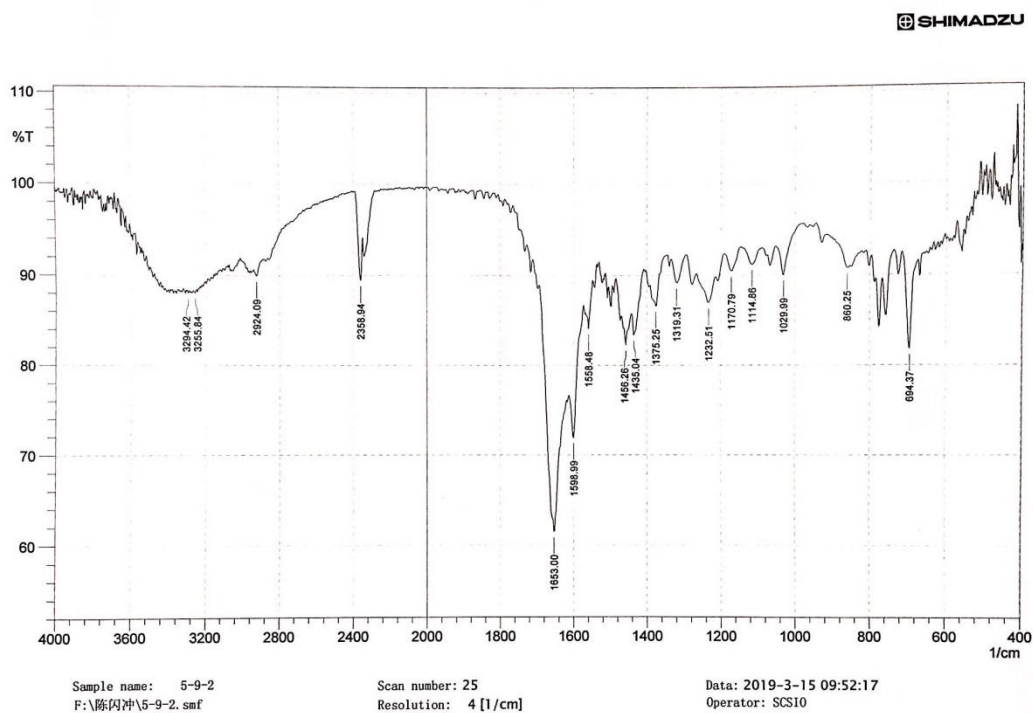

Figure S88. IR spectrum of 7

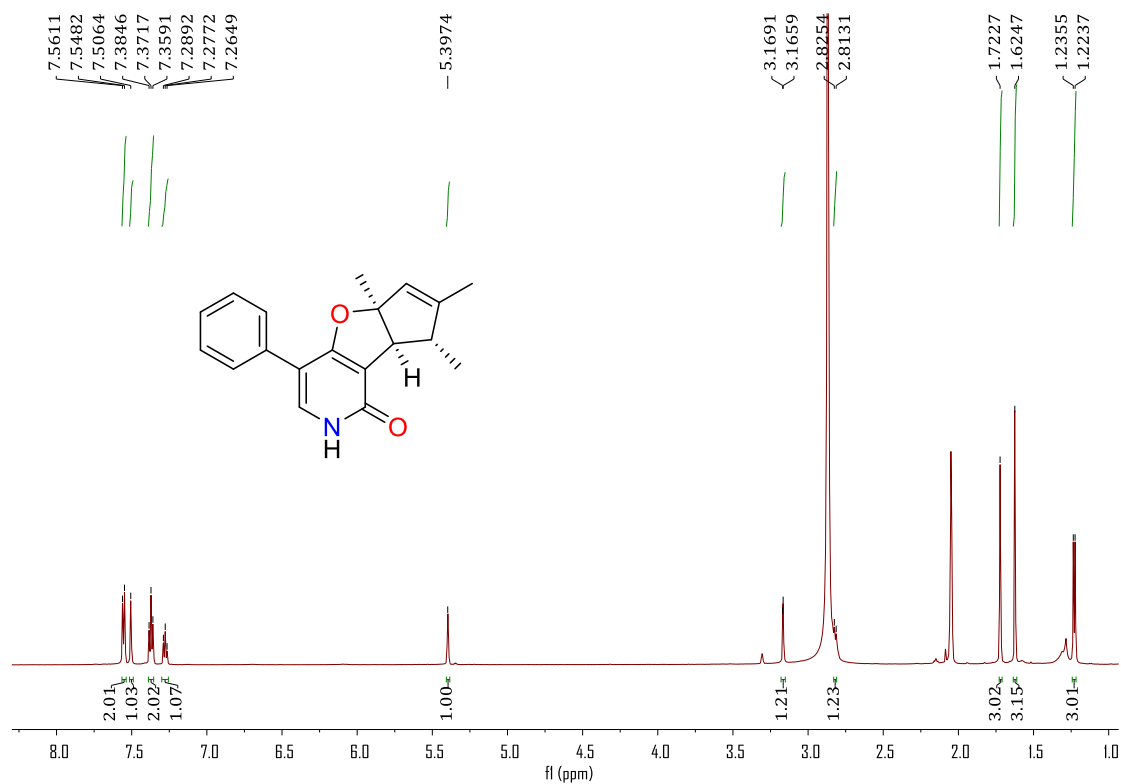

Figure S89. <sup>1</sup>H NMR spectrum (600 MHz, CD<sub>3</sub>OD) of **8a**

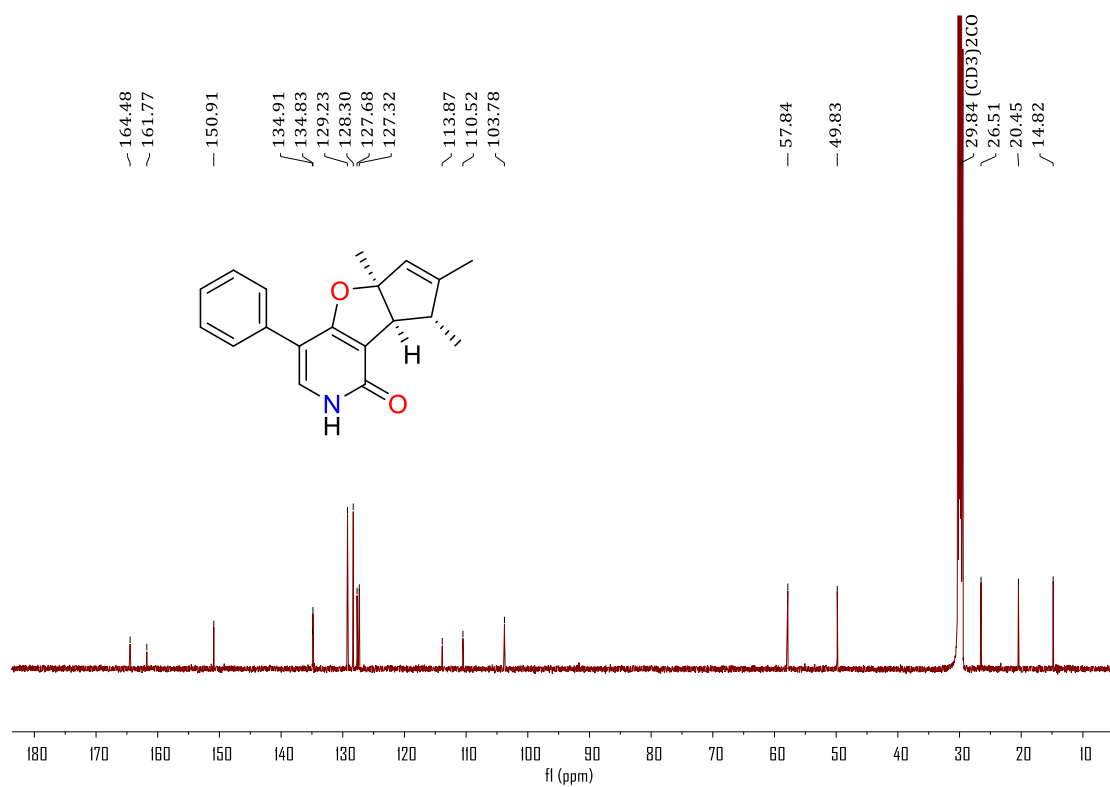

Figure S90. <sup>13</sup>C NMR spectrum (150 MHz, CD<sub>3</sub>OD) of **8a**

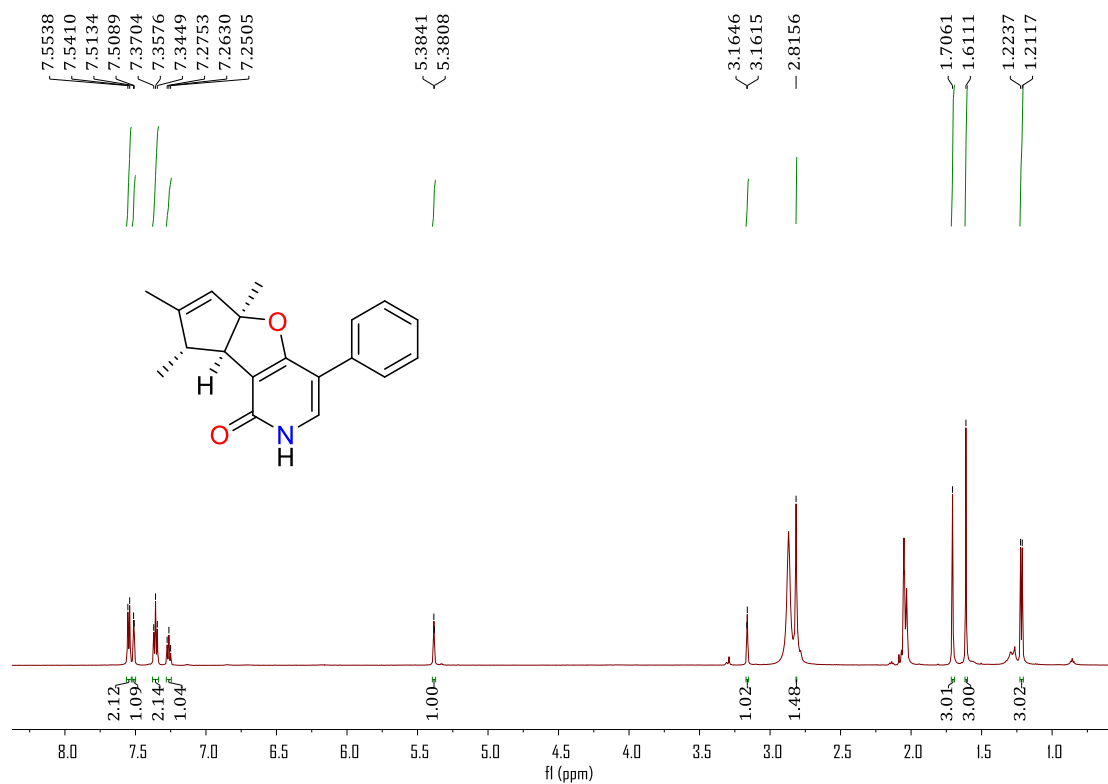

Figure S91. <sup>1</sup>H NMR spectrum (600 MHz, CD<sub>3</sub>OD) of **8b**

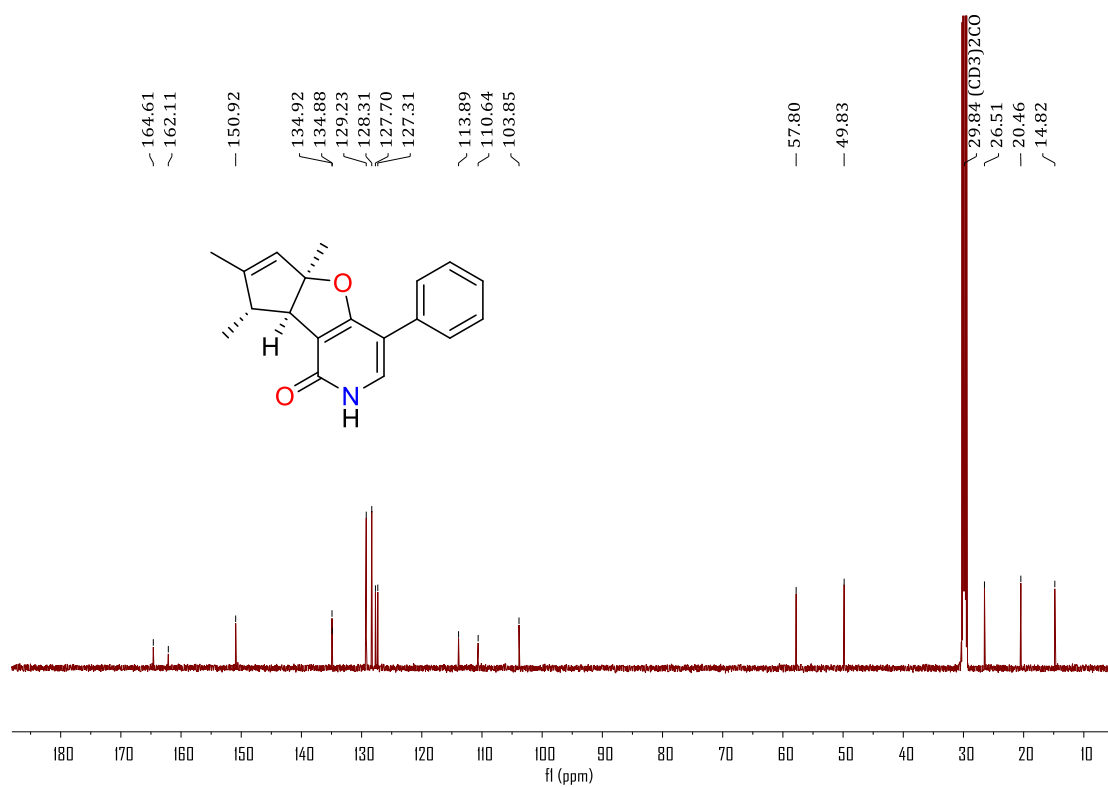

Figure S92. <sup>13</sup>C NMR spectrum (150 MHz, CD<sub>3</sub>OD) of **8b**

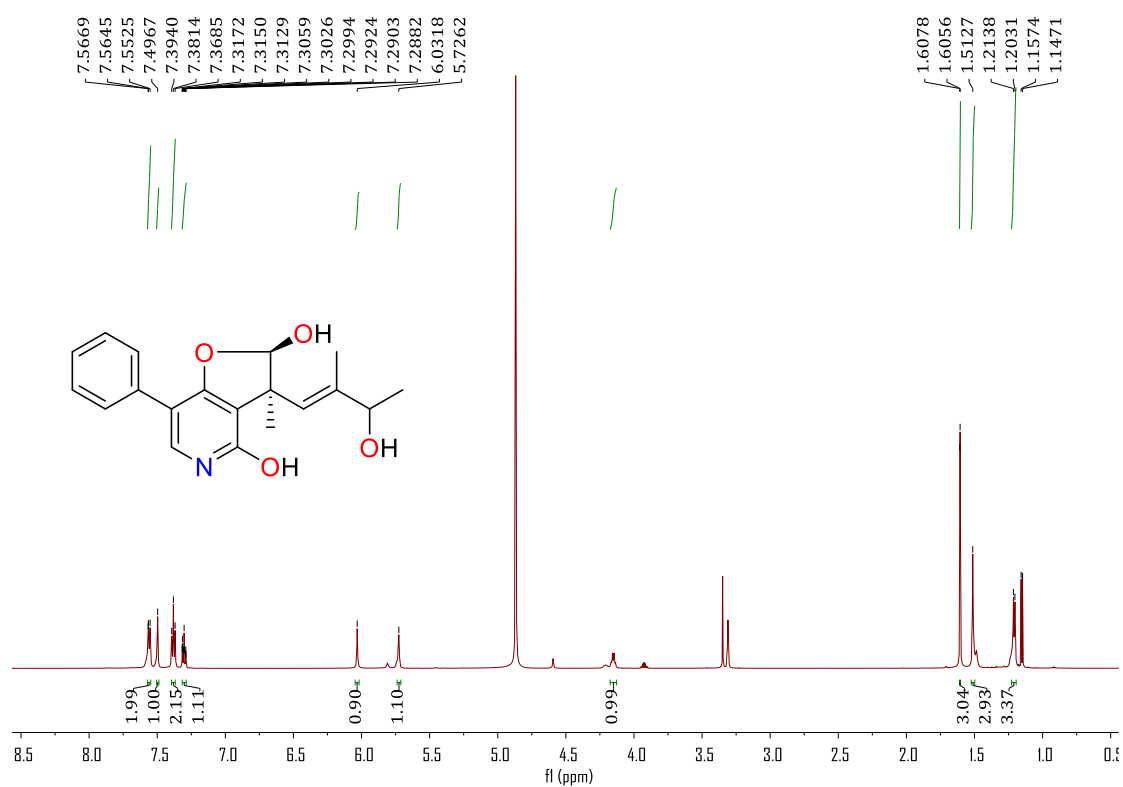

Figure S93. <sup>1</sup>H NMR spectrum (600 MHz, CD<sub>3</sub>OD) of **9**

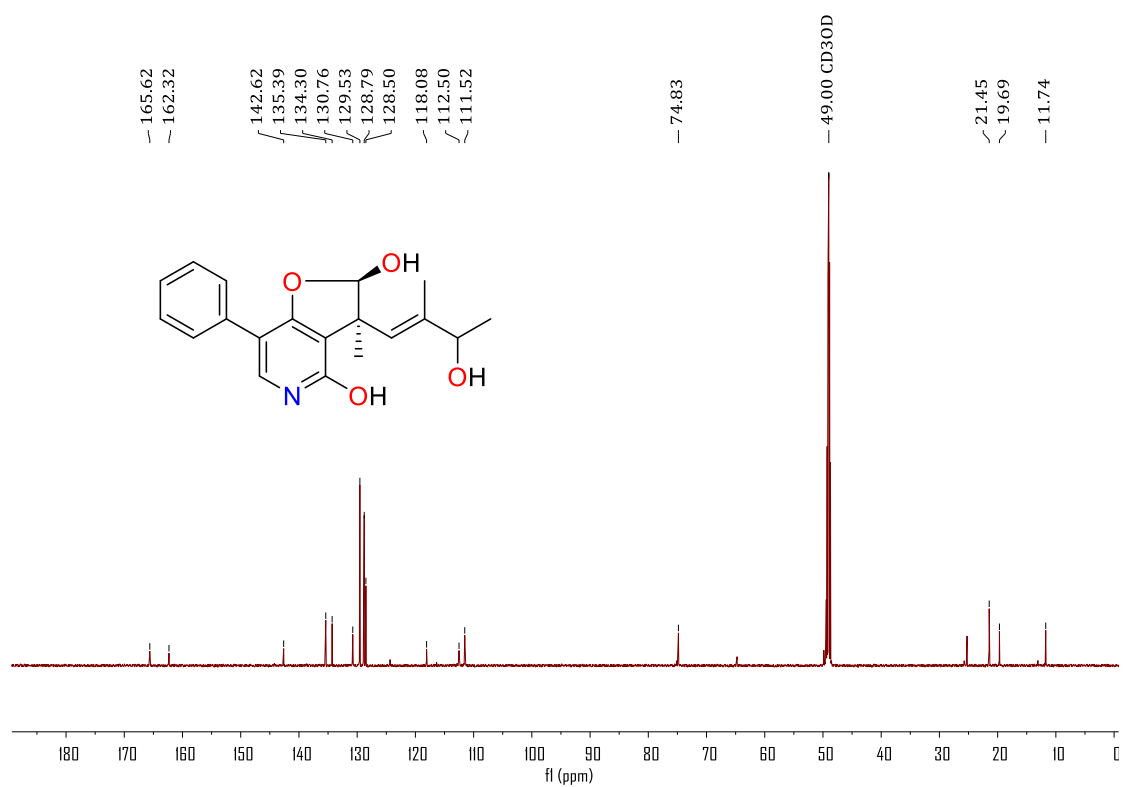

Figure S94. <sup>13</sup>C NMR spectrum (150 MHz, CD<sub>3</sub>OD) of **9**
